# Supplementary material for: Facile synthesis of 3-substituted imidazo[1,2-a]pyridines through formimidamide chemistry
Source: Royal Society of Chemistry journal article supplement (doi:10.1039/c9ra05841a), 2019-01-01
Supplement: c9ra05841a1.pdf [file c9ra05841a1.pdf]

## Supporting Information

### Facile Synthesis of 3-Substituted Imidazo[1,2-a]pyridines Through Formimidamide Chemistry

Sivappa Rasapalli,<sup>a\*</sup> Vamshikrishnareddy Sammeta,<sup>a</sup> Yanchang Huang,<sup>a</sup> James A Golen,<sup>a</sup> and Sergey N Savinov<sup>b</sup>

<sup>a</sup> Department of Chemistry and Biochemistry, University of Massachusetts, 287 Old Westport Rd, N. Dartmouth, MA-02747, USA.

<sup>b</sup> Department of Biochemistry and Molecular Biology, UMass Amherst, Amherst, MA-01003, USA Current address:

[\\*srasapalli@umassd.edu](mailto:srasapalli@umassd.edu)

|                                                                                                      |       |
|------------------------------------------------------------------------------------------------------|-------|
| I- General Information .....                                                                         | 2     |
| II- Experimental Details for the Synthesis of Pyridinium salts .....                                 | 3     |
| III- Experimental Details for the Synthesis of 3-aryl/alkenyl/alkynyl- imidazo[1,2-a]pyridines ..... | 3-7   |
| IV- NMR spectra of synthesised compounds .....                                                       | 8-59  |
| V- X-ray crystallographic data .....                                                                 | 60-71 |

**I: General Information:**

All the reactions were performed in oven-dried glassware. Thin-layer chromatography (TLC) was performed using aluminum backed silica coated plates. TLC plates were visualized under Ultraviolet light. All the  $^1\text{H}$  and  $^{13}\text{C}$  NMRs were recorded on Bruker AVANCE III HD 400 MHz High-Performance Digital NMR spectrometer  $^1\text{H}$  (400 MHz),  $^{13}\text{C}$  (101 MHz) with complete proton decoupling for  $^{13}\text{C}$ . Chemical shifts were analyzed on MestReNova software. Chemical shifts are reported in parts per million with the solvent resonance as the internal standard ( $\text{CDCl}_3$ ,  $^1\text{H}$ :  $\delta$  7.26 ppm,  $^{13}\text{C}$ : 77.16 ppm; DMSO,  $^1\text{H}$ :  $\delta$  2.50 ppm,  $^{13}\text{C}$ :  $\delta$  39.52 ppm). Coupling constants are reported in Hertz (Hz). Abbreviations are used as follows: s = singlet, d = doublet, t = triplet, q = quartet, m = multiplet, dd = doublet of doublet. High Resolution Mass Spectrometry (HRMS) were recorded on a Waters QToF-I spectrometer using electrospray ionization. Melting points were measured on a Standard Melting Point Apparatus and are uncorrected.

## II. General procedure for the Synthesis of (Z)-1-benzyl-2-(((dimethylamino)methylene)amino)pyridin-1-ium bromides:

To the compound imine (**1**) (5g, 33.51mmol) in toluene (45ml) was added benzyl bromide (6.87g, 40.21mmol) and the contents were stirred at 110°C until the starting material disappeared. The salt precipitated was filtered and washed with diethyl ether and dried under vacuum. Yellow colour solid, yield: 82%; <sup>1</sup>H NMR (400 MHz, Deuterium Oxide) δ 8.21 (d, J = 6.5 Hz, 1H), 8.06 (s, 1H), 7.94 (t, J = 8.0 Hz, 1H), 7.43 – 7.14 (m, 9H), 7.12 (t, J = 6.9 Hz, 1H), 5.48 (s, 2H), 3.12 (s, 3H), 3.02 (s, 4H); <sup>13</sup>C NMR (101 MHz, Deuterium Oxide) δ 158.24, 157.62, 144.28, 141.70, 135.02, 128.97, 128.48, 127.88, 117.29, 116.52, 57.01, 41.09, 35.17. **HRMS** (ES+) m/z calc. for [C<sub>15</sub>H<sub>18</sub>N<sub>3</sub><sup>+</sup>+H<sup>+</sup>]: 240.1495; found: 240.0837.

**Note:** All the pyridinium salts (**2a-2o**, **5a-5d** & **8a-8e**) were synthesized using the above procedure. In the case of salts that were semisolids and separate from toluene as a different layer, the toluene was carefully removed and the salt was dried under vacuum.

## III. General procedure for the Synthesis of Imidazopyridines (**3a-3o**, **6a-6d** & **9a-9e**):

To the corresponding pyridinium salt (1g, 1eq) in dry THF (30ml) was added 60% NaH (2eq) and the contents were stirred at 65°C under nitrogen until the disappearance of starting material. The reaction mixture was then subjected to evaporation under reduced pressure and the residue was diluted with DCM (40ml). The organic layer was extracted with saturated NH<sub>4</sub>Cl (20ml) followed by saturated NaCl solution and the organic layer was dried using Na<sub>2</sub>SO<sub>4</sub> and evaporated under reduced pressure. The desired compound was obtained after performing column chromatography on silica gel using hexane : ethyl acetate as eluent.

### 3-phenylimidazo[1,2-a]pyridine (**3a**):

Pale brown solid; Melting point 90 – 93 °C; Yield 44%; <sup>1</sup>H NMR (400 MHz, DMSO-*d*<sup>6</sup>) δ 8.56 (d, J = 7.0 Hz, 1H), 7.78 (s, 1H), 7.67 (d, J = 7.1 Hz, 3H), 7.56 (t, J = 7.7 Hz, 2H), 7.45 (t, J = 7.4 Hz, 1H), 7.31 (ddd, J = 9.0, 6.7, 1.3 Hz, 1H), 6.97 (t, J = 7.3 Hz, 1H); <sup>13</sup>C NMR (101 MHz, DMSO-*d*<sup>6</sup>) δ 169.91, 159.87, 141.49, 141.14, 136.91, 129.08, 128.19, 118.01, 112.70, 54.42. **HRMS** (ES+) m/z calc. for [C<sub>13</sub>H<sub>10</sub>N<sub>2</sub>+H<sup>+</sup>]: 195.0844; found: 195.0256.

### 3-(naphthalen-2-yl)imidazo[1,2-a]pyridine (**3b**):

Straw solid; Melting point 51 – 53 °C; Yield 32.6%; <sup>1</sup>H NMR (400 MHz, DMSO-*d*<sup>6</sup>) δ 8.74 (d, J = 7.0 Hz, 1H), 8.25 (s, 1H), 8.09 (d, J = 8.5 Hz, 1H), 8.07 – 7.95 (m, 2H), 7.92 (s, 1H), 7.81 (dd, J = 8.5, 1.9 Hz, 1H), 7.71 (d, J = 9.1 Hz, 1H), 7.63 – 7.53 (m, 2H), 7.35 (ddd, J = 9.1, 6.7, 1.2 Hz, 1H), 7.02 (t, J = 7.3 Hz, 1H); <sup>13</sup>C NMR (101 MHz, DMSO-*d*<sup>6</sup>) δ 146.21, 133.75, 133.60, 132.74, 129.32, 128.55, 128.12, 127.14, 126.89, 126.83, 126.12, 126.06, 125.51, 125.23, 124.78, 118.09, 113.50. **HRMS** (ES+) m/z calc. for [C<sub>17</sub>H<sub>12</sub>N<sub>2</sub>+H<sup>+</sup>]: 245.1000; found: 245.0322.

### 3-(2-chlorophenyl)imidazo[1,2-a]pyridine (**3c**):

Light yellow Oil; Yield 40.6%; <sup>1</sup>H NMR (400 MHz, DMSO-*d*<sup>6</sup>) δ 8.00 (d, J = 6.9 Hz, 1H), 7.73 (s, 1H), 7.72 – 7.67 (m, 2H), 7.65 – 7.48 (m, 3H), 7.34 (ddd, J = 9.1, 6.7, 1.2 Hz, 1H), 6.96 (t, J = 7.3 Hz, 1H); <sup>13</sup>C NMR (101 MHz, DMSO-*d*<sup>6</sup>) δ 145.57, 133.99, 133.40, 131.29, 130.54, 128.29, 128.04, 125.29, 125.27, 122.69, 117.79, 113.04. **HRMS** (ES+) m/z calc. for [C<sub>13</sub>H<sub>9</sub>ClN<sub>2</sub>+H<sup>+</sup>]: 229.0454; found: 229.0067.

### 3-(2-(trifluoromethyl)phenyl)imidazo[1,2-a]pyridine (**3d**):

Off-white solid; Melting point 99 – 101 °C; Yield 54.1%; <sup>1</sup>H NMR (400 MHz, DMSO-*d*<sup>6</sup>) δ 7.99 (d, J = 7.8 Hz, 1H), 7.94 (d, J = 6.9 Hz, 1H), 7.87 (t, J = 7.3 Hz, 1H), 7.78 (t, J = 7.6 Hz, 1H), 7.72 – 7.64 (m, 2H), 7.62 (s, 1H), 7.32 (ddd, J = 9.0, 6.7, 1.2 Hz, 1H), 6.91 (t, J = 6.3 Hz, 1H); <sup>13</sup>C NMR (101 MHz, DMSO-*d*<sup>6</sup>) δ 145.30, 134.06, 133.93 (d, J = 2.2 Hz), 133.54, 130.49, 129.88 (q, J = 29.0 Hz), 127.25 (q, J = 5.2 Hz), 125.59, 125.26, 124.73, 122.87, 120.90, 117.60, 113.23. **HRMS** (ES+) m/z calc. for [C<sub>14</sub>H<sub>9</sub>F<sub>3</sub>N<sub>2</sub>+H<sup>+</sup>]: 263.0718; found: 262.9951.

### 3-(3-nitrophenyl)imidazo[1,2-a]pyridine (3e):

Yellow solid; Melting point 133 – 134 °C; Yield 70.5%; <sup>1</sup>H NMR (400 MHz, DMSO-*d*<sup>6</sup>) δ 8.67 (d, J = 7.0 Hz, 1H), 8.44 (t, J = 2.0 Hz, 1H), 8.25 (ddd, J = 8.3, 2.3, 1.0 Hz, 1H), 8.15 (dd, J = 7.7, 0.8 Hz, 1H), 7.96 (s, 1H), 7.83 (t, J = 8.0 Hz, 1H), 7.71 (d, J = 9.1 Hz, 1H), 7.37 (ddd, J = 9.0, 6.7, 1.2 Hz, 1H), 7.03 (t, J = 7.3 Hz, 1H); <sup>13</sup>C NMR (101 MHz, DMSO-*d*<sup>6</sup>) δ 148.94, 146.57, 134.36, 134.11, 131.28, 131.00, 125.83, 124.71, 123.52, 122.75, 122.20, 118.10, 113.80. HRMS (ES+) m/z calc. for [C<sub>13</sub>H<sub>9</sub>N<sub>3</sub>O<sub>2</sub>+H<sup>+</sup>]: 240.0695; found: 239.9997.

### 3-(3-(trifluoromethyl)phenyl)imidazo[1,2-a]pyridine (3f):

Straw solid; Melting point 68 – 71 °C; Yield 65.9%; <sup>1</sup>H NMR (400 MHz, DMSO-*d*<sup>6</sup>) δ 8.59 (d, J = 7.0 Hz, 1H), 8.06 – 7.96 (m, 2H), 7.91 (s, 1H), 7.79 (d, J = 5.2 Hz, 2H), 7.69 (d, J = 9.1 Hz, 1H), 7.35 (ddd, J = 9.1, 6.7, 1.2 Hz, 1H), 7.02 (t, J = 7.3 Hz, 1H); <sup>13</sup>C NMR (101 MHz, DMSO-*d*<sup>6</sup>) δ 146.40, 134.03, 131.69, 130.86, 130.74, 130.52, 130.42, 125.60, 124.86, 124.82, 124.63, 124.46, 124.42, 124.12, 118.05, 113.67. <sup>13</sup>C NMR (101 MHz, DMSO-*d*<sup>6</sup>) δ 146.40, 134.03, 131.69, 130.86, 130.52, 125.87, 125.60, 124.84 (q, J = 3.9 Hz), 124.63, 124.44 (q, J = 3.8 Hz), 124.12, 123.16, 118.05, 113.67.

HRMS (ES+) m/z calc. for [C<sub>14</sub>H<sub>9</sub>F<sub>3</sub>N<sub>2</sub>+H<sup>+</sup>]: 263.0718; found: 262.9951.

### 3-(3-chlorophenyl)imidazo[1,2-a]pyridine (3g):

Light yellow Oil; Yield 45.2%; <sup>1</sup>H NMR (400 MHz, DMSO-*d*<sup>6</sup>) δ 8.59 (d, J = 7.0 Hz, 1H), 7.86 (s, 1H), 7.74 (t, J = 1.9 Hz, 1H), 7.71 – 7.63 (m, 2H), 7.57 (t, J = 7.8 Hz, 1H), 7.49 (ddd, J = 8.0, 2.2, 1.2 Hz, 1H), 7.34 (ddd, J = 9.1, 6.7, 1.2 Hz, 1H), 7.00 (t, J = 7.3 Hz, 1H); <sup>13</sup>C NMR (101 MHz, DMSO-*d*<sup>6</sup>) δ 146.32, 134.43, 133.83, 131.54, 131.49, 128.14, 127.48, 126.35, 125.46, 124.74, 124.13, 118.03, 113.58. HRMS (ES+) m/z calc. for [C<sub>13</sub>H<sub>9</sub>ClN<sub>2</sub>+H<sup>+</sup>]: 229.0454; found: 228.9779.

### 3-(3-fluorophenyl)imidazo[1,2-a]pyridine (3h):

Straw solid; Melting point 44 – 46 °C; Yield 55.1%; <sup>1</sup>H NMR (400 MHz, DMSO-*d*<sup>6</sup>) δ 8.63 (d, J = 7.0 Hz, 1H), 7.85 (s, 1H), 7.68 (d, J = 9.1 Hz, 1H), 7.63 – 7.50 (m, 3H), 7.34 (ddd, J = 9.1, 6.7, 1.2 Hz, 1H), 7.31 – 7.24 (m, 1H), 7.00 (t, J = 7.2 Hz, 1H); <sup>13</sup>C NMR (101 MHz, DMSO-*d*<sup>6</sup>) δ 164.28, 161.85, 146.31, 133.78, 131.69 (dd, J = 12.8, 8.8 Hz), 125.42, 124.80, 124.35 (d, J = 2.6 Hz), 123.84 (d, J = 2.9 Hz), 118.03, 115.06 (d, J = 21.1 Hz), 114.54 (d, J = 22.6 Hz), 113.56. HRMS (ES+) m/z calc. for [C<sub>13</sub>H<sub>9</sub>FN<sub>2</sub>+H<sup>+</sup>]: 213.0750; found: 213.0141.

### 3-(4-bromophenyl)imidazo[1,2-a]pyridine (3i):

Off-white solid; Melting point 114 – 116 °C Yield 45.6%; <sup>1</sup>H NMR (400 MHz, Methanol-*d*<sup>4</sup>) δ 8.52 (d, J = 7.0 Hz, 1H), 7.75 (s, 1H), 7.73 (d, J = 3.0 Hz, 2H), 7.65 (d, J = 9.2 Hz, 1H), 7.59 (d, J = 8.3 Hz, 2H), 7.45 – 7.36 (m, 1H), 7.03 (t, J = 6.8 Hz, 1H); <sup>13</sup>C NMR (101 MHz, Methanol-*d*<sup>4</sup>) δ 146.04, 132.18, 131.16, 129.38, 127.78, 125.57, 124.90, 123.74, 121.87, 116.69, 113.20. HRMS (ES+) m/z calc. for [C<sub>13</sub>H<sub>9</sub>BrN<sub>2</sub>+H<sup>+</sup>]: 272.9949; found: 272.9240.

### 3-(4-fluorophenyl)imidazo[1,2-a]pyridine (3j):

Light yellow Oil; Yield 30.8%; <sup>1</sup>H NMR (400 MHz, DMSO-*d*<sup>6</sup>) δ 8.51 (d, J = 6.9 Hz, 1H), 7.76 (s, 1H), 7.72 (dd, J = 8.6, 5.5 Hz, 2H), 7.67 (d, J = 9.1 Hz, 1H), 7.40 (t, J = 8.8 Hz, 2H), 7.35 – 7.27 (m, 1H), 6.97 (t, J = 6.7 Hz, 1H); <sup>13</sup>C NMR (101 MHz, DMSO-*d*<sup>6</sup>) δ 163.42, 160.98, 145.90, 133.02, 130.38 (d, J = 8.3 Hz), 125.85 (d, J = 3.0 Hz), 125.07, 124.45, 117.99, 116.71 (d, J = 21.6 Hz), 113.35. HRMS (ES+) m/z calc. for [C<sub>13</sub>H<sub>9</sub>FN<sub>2</sub>+H<sup>+</sup>]: 213.0750; found: 213.0140.

### 3-(3-chloro-4-fluorophenyl)imidazo[1,2-a]pyridine (3k):

Off-white solid; Melting point 128 – 130 °C; Yield 68.6%; <sup>1</sup>H NMR (400 MHz, DMSO-*d*<sup>6</sup>) δ 8.55 (d, J = 7.0 Hz, 1H), 7.91 (dd, J = 7.1, 2.2 Hz, 1H), 7.82 (s, 1H), 7.74 – 7.64 (m, 2H), 7.59 (t, J = 8.9 Hz, 1H), 7.33 (ddd, J = 9.1, 6.7, 1.2 Hz, 1H), 6.99 (t, J = 7.3 Hz, 1H); <sup>13</sup>C NMR (101 MHz, DMSO-*d*<sup>6</sup>) δ 158.43, 155.97, 146.16, 133.73,

130.13, 128.83 (d, J = 7.4 Hz), 127.30 (d, J = 3.9 Hz), 125.42, 124.70, 123.38, 120.91 (d, J = 18.0 Hz), 118.01 (d, J = 10.9 Hz), 113.51. **HRMS** (ES+) m/z calc. for [C<sub>13</sub>H<sub>8</sub>ClFN<sub>2</sub>+H<sup>+</sup>]: 247.0360; found: 246.9800.

**3-(4-(trifluoromethyl)phenyl)imidazo[1,2-a]pyridine (3l):**

Off-white solid; Melting point 150 – 152 °C; Yield 58.1%; **<sup>1</sup>H NMR** (400 MHz, DMSO-*d*<sup>6</sup>) δ 8.68 (d, J = 7.0 Hz, 1H), 7.93 (t, J = 4.2 Hz, 3H), 7.89 (d, J = 8.4 Hz, 2H), 7.71 (d, J = 9.1 Hz, 1H), 7.36 (ddd, J = 9.0, 6.7, 1.2 Hz, 1H), 7.02 (t, J = 7.3 Hz, 1H); **<sup>13</sup>C NMR** (101 MHz, DMSO-*d*<sup>6</sup>) δ 146.67, 134.38, 133.54, 128.16, 126.57 (q, J = 3.8 Hz), 126.04, 125.76, 124.85, 124.21, 123.34, 118.13, 113.75. **HRMS** (ES+) m/z calc. for [C<sub>14</sub>H<sub>9</sub>F<sub>3</sub>N<sub>2</sub>+H<sup>+</sup>]: 263.0718; found: 263.0054.

**3-(3,5-bis(trifluoromethyl)phenyl)imidazo[1,2-a]pyridine (3m):**

Off-white solid; Melting point 90 – 92 °C; Yield 94.7%; **<sup>1</sup>H NMR** (400 MHz, DMSO-*d*<sup>6</sup>) δ 8.64 (d, J = 6.9 Hz, 1H), 8.35 (s, 2H), 8.13 (s, 1H), 8.04 (s, 1H), 7.72 (d, J = 9.0 Hz, 1H), 7.40 (t, J = 6.7 Hz, 1H), 7.06 (t, J = 6.7 Hz, 1H); **<sup>13</sup>C NMR** (101 MHz, DMSO-*d*<sup>6</sup>) δ 146.73, 135.06, 131.84 (q), 128.36, 126.19, 125.06, 124.90, 122.91, 122.34, 121.50, 117.96, 113.92. **HRMS** (ES+) m/z calc. for [C<sub>15</sub>H<sub>8</sub>F<sub>6</sub>N<sub>2</sub>+H<sup>+</sup>]: 331.0592; found: 330.9663.

**3-(3,5-difluorophenyl)imidazo[1,2-a]pyridine (3n):**

White solid; Melting point 114 – 115 °C; Yield 86.3%; **<sup>1</sup>H NMR** (400 MHz, Methanol-*d*<sup>4</sup>) δ 8.58 (d, J = 7.0 Hz, 1H), 7.79 (s, 1H), 7.66 (d, J = 9.1 Hz, 1H), 7.51 – 7.37 (m, 1H), 7.31 (d, J = 6.3 Hz, 2H), 7.14 – 6.94 (m, 2H); **<sup>13</sup>C NMR** (101 MHz, Methanol-*d*<sup>4</sup>) δ 164.90 (d, J = 13.5 Hz), 162.43 (d, J = 13.5 Hz), 146.41, 132.07, 126.02, 123.99, 116.76, 113.50, 110.41 (d, J = 7.7 Hz), 110.21 (d, J = 7.7 Hz), 103.01 (t, J = 25.8 Hz). **HRMS** (ES+) m/z calc. for [C<sub>13</sub>H<sub>8</sub>F<sub>2</sub>N<sub>2</sub>+H<sup>+</sup>]: 231.0656; found: 231.0055.

**3-(2-chloro-6-fluorophenyl)imidazo[1,2-a]pyridine (3o):**

Yellow solid; Melting point 96 – 99 °C; Yield 43.6%; **<sup>1</sup>H NMR** (400 MHz, Methanol-*d*<sup>4</sup>) δ 7.71 (d, J = 6.9 Hz, 1H), 7.67 (s, 2H), 7.65 (s, 1H), 7.40 (q, J = 9.5, 8.9 Hz, 4H), 7.17 (dd, J = 16.4, 8.1 Hz, 3H), 6.95 (t, J = 7.1 Hz, 2H); **<sup>13</sup>C NMR** (101 MHz, Methanol-*d*<sup>4</sup>) δ 155.21, 145.08, 136.37, 133.23, 130.69, 125.23, 124.89, 122.02, 121.12, 118.97, 116.77, 116.06, 112.22. **HRMS** (ES+) m/z calc. for [C<sub>13</sub>H<sub>8</sub>ClFN<sub>2</sub>+H<sup>+</sup>]: 247.0360; found: 247.0000.

**6-chloro-3-phenylimidazo[1,2-a]pyridine (6a):**

Straw solid; Melting point 51 – 54 °C; Yield 41%; **<sup>1</sup>H NMR** (400 MHz, DMSO-*d*<sup>6</sup>) δ 8.60 (s, 1H), 7.84 (s, 1H), 7.76 – 7.67 (m, 3H), 7.57 (t, J = 7.6 Hz, 2H), 7.47 (t, J = 7.7 Hz, 1H), 7.36 (dd, J = 9.6, 1.9 Hz, 1H); **<sup>13</sup>C NMR** (101 MHz, DMSO-*d*<sup>6</sup>) δ 146.11, 144.42, 141.09, 133.97, 129.83, 128.78, 128.16, 125.91, 122.33, 120.46, 118.88. **HRMS** (ES+) m/z calc. for [C<sub>13</sub>H<sub>9</sub>ClN<sub>2</sub>+H<sup>+</sup>]: 229.0454; found: 229.0259.

**6-bromo-3-phenylimidazo[1,2-a]pyridine (6b):**

Camel solid; Melting point 65 – 67 °C; Yield 40.8%; **<sup>1</sup>H NMR** (400 MHz, DMSO-*d*<sup>6</sup>) δ 8.64 (s, 1H), 7.81 (s, 1H), 7.72 – 7.63 (m, 3H), 7.57 (t, J = 7.6 Hz, 2H), 7.47 (t, J = 7.4 Hz, 1H), 7.42 (dd, J = 9.5, 1.8 Hz, 1H); **<sup>13</sup>C NMR** (101 MHz, DMSO-*d*<sup>6</sup>) δ 144.45, 133.76, 129.83, 128.78, 128.73, 128.20, 127.98, 126.23, 124.27, 119.14, 107.47. **HRMS** (ES+) m/z calc. for [C<sub>13</sub>H<sub>9</sub>BrN<sub>2</sub>+H<sup>+</sup>]: 272.9949; found: 272.9345.

**6-methyl-3-phenylimidazo[1,2-a]pyridine (6c):**

Light yellow Oil; Yield 33.2%; **<sup>1</sup>H NMR** (400 MHz, Methanol-*d*<sup>4</sup>) δ 8.24 (s, 1H), 7.65 – 7.49 (m, 6H), 7.46 (t, J = 7.2 Hz, 1H), 7.23 (d, J = 10.3 Hz, 1H), 2.34 (s, 3H); **<sup>13</sup>C NMR** (101 MHz, Methanol-*d*<sup>4</sup>) δ 144.80, 130.59, 129.00, 128.85, 128.37, 128.09, 127.84, 125.78, 123.10, 121.13, 115.94, 16.81. **HRMS** (ES+) m/z calc. for [C<sub>14</sub>H<sub>12</sub>N<sub>2</sub>+H<sup>+</sup>]: 209.1000; found: 209.0377.

### 3-phenyl-6-(trifluoromethyl)imidazo[1,2-a]pyridine (6d):

Off-white solid; Melting point 121 – 123 °C; Yield 26.5%; <sup>1</sup>H NMR (400 MHz, Methanol-*d*<sup>4</sup>) δ 8.77 (s, 1H), 7.83 (d, J = 8.2 Hz, 2H), 7.73 – 7.45 (m, 6H); <sup>13</sup>C NMR (101 MHz, Methanol-*d*<sup>4</sup>) δ 145.48, 132.61, 129.28, 128.89, 128.10, 127.72 (d, J = 5.8 Hz), 124.98, 122.95 (d, J = 5.9 Hz), 122.30, 120.77 (q, J = 2.4 Hz), 117.85, 117.05 (q, J = 34.0 Hz). **HRMS** (ES+) *m/z* calc. for [C<sub>14</sub>H<sub>9</sub>F<sub>3</sub>N<sub>2</sub>+H<sup>+</sup>]: 263.0718; found: 262.9951.

### 3-ethynylimidazo[1,2-a]pyridine (9a):

Pale brown solid; Melting point 76 – 79 °C; Yield 24.2%; <sup>1</sup>H NMR (400 MHz, DMSO-*d*<sup>6</sup>) δ 8.46 (d, J = 6.8 Hz, 1H), 7.96 (s, 1H), 7.71 (d, J = 9.0 Hz, 1H), 7.42 (t, J = 6.8 Hz, 1H), 7.12 (t, J = 6.8 Hz, 1H), 5.09 (s, 1H); <sup>13</sup>C NMR (101 MHz, DMSO-*d*<sup>6</sup>) δ 145.42, 138.87, 126.88, 125.96, 117.90, 114.27, 107.67, 91.68, 71.74. **HRMS** (ES+) *m/z* calc. for [C<sub>9</sub>H<sub>6</sub>N<sub>2</sub>+H<sup>+</sup>]: 143.0531; found: 143.0097.

### 3-vinylimidazo[1,2-a]pyridine (9b):

Red brown solid; Melting point 38 – 41 °C; Yield 21.1%; <sup>1</sup>H NMR (400 MHz, DMSO-*d*<sup>6</sup>) δ 8.63 (d, J = 6.9 Hz, 1H), 7.90 (s, 1H), 7.60 (d, J = 9.0 Hz, 1H), 7.33 – 7.23 (m, 1H), 7.09 (dd, J = 17.6, 11.5 Hz, 1H), 6.99 (t, J = 6.8 Hz, 1H), 5.84 (d, J = 17.6 Hz, 1H), 5.31 (d, J = 11.6 Hz, 1H); <sup>13</sup>C NMR (101 MHz, DMSO-*d*<sup>6</sup>) δ 145.69, 132.24, 125.09, 124.90, 124.16, 122.80, 117.80, 113.29, 113.21. **HRMS** (ES+) *m/z* calc. for [C<sub>9</sub>H<sub>8</sub>N<sub>2</sub>+H<sup>+</sup>]: 145.0687; found: 145.0249.

### 3-(prop-1-en-2-yl)imidazo[1,2-a]pyridine (9c):

Light yellow Oil; Yield 13.6%; <sup>1</sup>H NMR (400 MHz, Methanol-*d*<sub>4</sub>) δ 8.61 (d, J = 7.0 Hz, 1H), 7.62 (s, 1H), 7.59 (d, J = 9.1 Hz, 1H), 7.35 (t, J = 6.7 Hz, 1H), 7.01 (t, J = 6.8 Hz, 1H), 5.44 (d, J = 10.8 Hz, 2H), 2.26 (s, 3H); <sup>13</sup>C NMR (101 MHz, Methanol-*d*<sup>4</sup>) δ 146.14, 132.45, 131.18, 126.24, 125.41, 125.18, 116.58, 112.94, 112.27, 21.94. **HRMS** (ES+) *m/z* calc. for [C<sub>10</sub>H<sub>10</sub>N<sub>2</sub>+H<sup>+</sup>]: 159.0844; found: 159.0301.

### (E)-3-(prop-1-en-1-yl)imidazo[1,2-a]pyridine (9d):

Brown solid; Melting point 59 – 61 °C; Yield 48.2%; <sup>1</sup>H NMR (400 MHz, DMSO-*d*<sup>6</sup>) δ 8.53 (d, J = 6.9 Hz, 1H), 7.75 (s, 1H), 7.56 (d, J = 9.0 Hz, 1H), 7.22 (ddd, J = 9.1, 6.7, 1.2 Hz, 1H), 6.94 (td, J = 6.8, 1.3 Hz, 1H), 6.77 (dd, J = 15.9, 1.9 Hz, 1H), 6.31 (dq, J = 15.8, 6.7 Hz, 1H), 1.94 (dd, J = 6.8, 1.7 Hz, 3H); <sup>13</sup>C NMR (101 MHz, DMSO-*d*<sup>6</sup>) δ 145.03, 133.45, 130.80, 126.11, 124.75, 124.21, 117.71, 116.97, 112.85, 19.14. **HRMS** (ES+) *m/z* calc. for [C<sub>10</sub>H<sub>10</sub>N<sub>2</sub>+H<sup>+</sup>]: 159.0844; found: 159.0301.

### (E)-3-(2,6-dimethylhepta-1,5-dien-1-yl)imidazo[1,2-a]pyridine (9e):

Light yellow Oil; Yield 24.2%; <sup>1</sup>H NMR (400 MHz, DMSO-*d*<sup>6</sup>) δ 8.42 (d, J = 7.0 Hz, 1H), 7.61 (s, 1H), 7.58 (d, J = 9.0 Hz, 1H), 7.29 – 7.20 (m, 1H), 6.95 (t, J = 7.2 Hz, 1H), 6.45 (s, 1H), 5.17 (t, J = 6.7 Hz, 1H), 2.38 – 2.11 (m, 4H), 1.93 (s, 3H), 1.64 (d, J = 22.2 Hz, 6H); <sup>13</sup>C NMR (101 MHz, DMSO-*d*<sup>6</sup>) δ 144.34, 140.34, 132.65, 131.67, 124.67, 124.48, 124.29, 122.80, 117.59, 112.65, 110.57, 40.53, 26.83, 25.97, 19.34, 18.10. **HRMS** (ES+) *m/z* calc. for [C<sub>16</sub>H<sub>20</sub>N<sub>2</sub>+H<sup>+</sup>]: 241.1626; found: 241.1004.

### Procedure for one-pot synthesis of 3-phenylimidazo[1,2-a]pyridine (3a):

Aminopyridine (1g, 0.0106 mol), DMF DMA (1.58g, 0.133 mol) and benzyl bromide (1.82g, 0.0106mol) were added to a pressure tube and the contents were stirred at 120°C on a hot plate until the disappearance of starting materials (typically ~1hr). Then while on heating 60% sodium hydride (0.51g, 0.021 mol) was added portion wise over a period of 5 min and the stirring was continued for 15 min. The contents were then cooled, diluted with 30 ml DCM and then extracted with saturated NH<sub>4</sub>Cl (20ml). The aqueous layer was again extracted with 2 more portions of DCM (15ml) and the organic layer was dried using Na<sub>2</sub>SO<sub>4</sub> and evaporated under reduced pressure to afford

crude product. The crude product was purified on silica gel column using DCM : MeOH as eluent to yield compound **3a** as a yellow oil, Yield 58%.

**Procedure for synthesis of 1-benzylpyridin-2(1H)-imine (7):**

(Z)-1-benzyl-2-(((dimethylamino)methylene)amino)pyridin-1-ium bromide (**2a**, 0.25g, 0.78mmol) was dissolved in water, to the above solution was added NaOH (0.94mmol, 38mg) and the contents were stirred at RT until the disappearance of the starting material (~45 min). The reaction mixture was extracted with DCM (10ml) twice then the organic layer was washed with brine, dried under Na<sub>2</sub>SO<sub>4</sub>. The resulting organic layer was reduced under pressure to afford crude product which was purified on silica gel column using DCM:MeOH as eluent to yield desired product in 41% yield; **<sup>1</sup>H NMR** (400 MHz, DMSO-*d*<sup>6</sup>) δ 8.93 (s, 1H), 8.23 (d, J = 5.5 Hz, 1H), 7.75 (t, J = 8.8 Hz, 1H), 7.67 (d, J = 9.0 Hz, 1H), 7.40 – 7.27 (m, 5H), 6.81 (t, J = 6.7 Hz, 1H), 5.50 (s, 2H); **<sup>13</sup>C NMR** (101 MHz, DMSO-*d*<sup>6</sup>) δ 169.91, 159.87, 141.49, 141.14, 136.91, 129.08, 128.19, 118.01, 112.70, 54.42. **HRMS** (ES+) m/z calc. for [C<sub>12</sub>H<sub>12</sub>N<sub>2</sub>+H<sup>+</sup>]: 185.1000; found: 185.0596.

**<sup>1</sup>H NMR of 1-benzyl-2-(((dimethylamino)methylene)amino)pyridin-1-ium bromide (2a):**

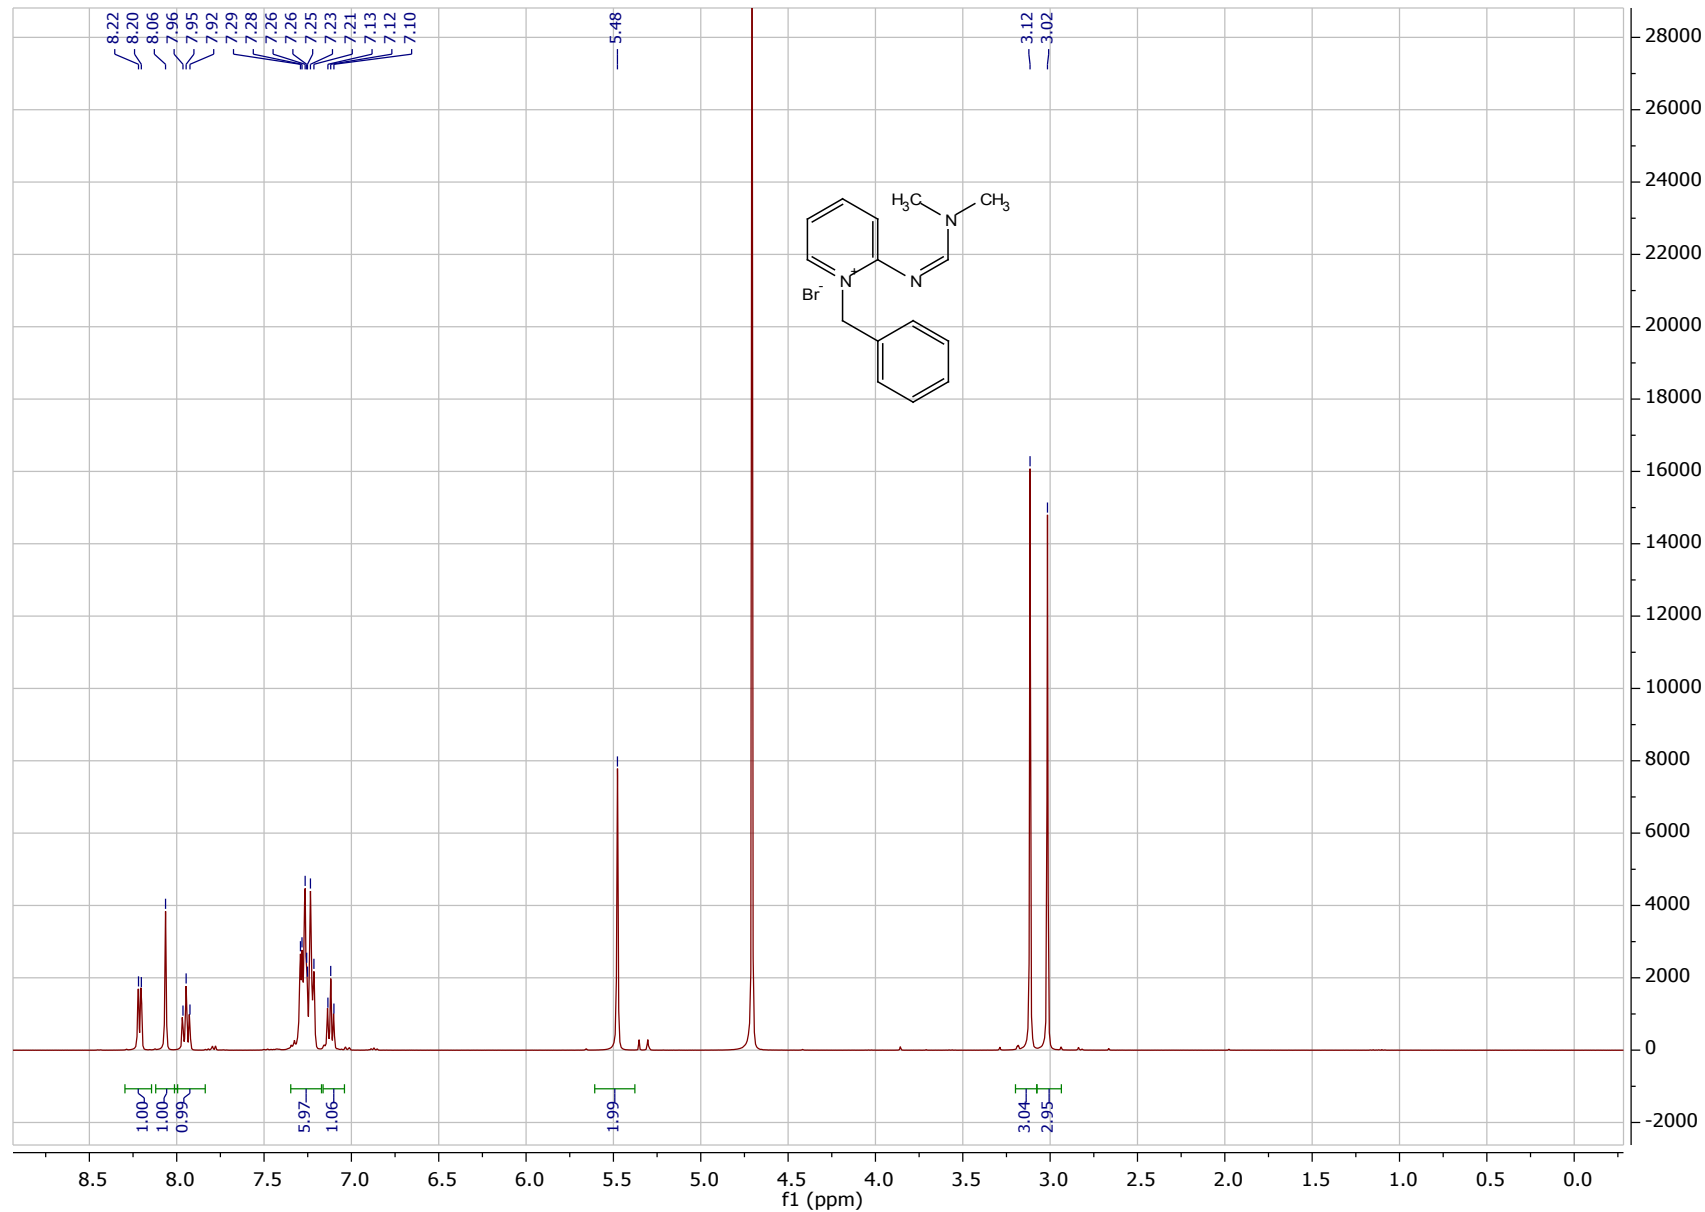



**<sup>13</sup>C NMR of (Z)-1-benzyl-2-(((dimethylamino)methylene)amino)pyridin-1-ium bromide (2a):**

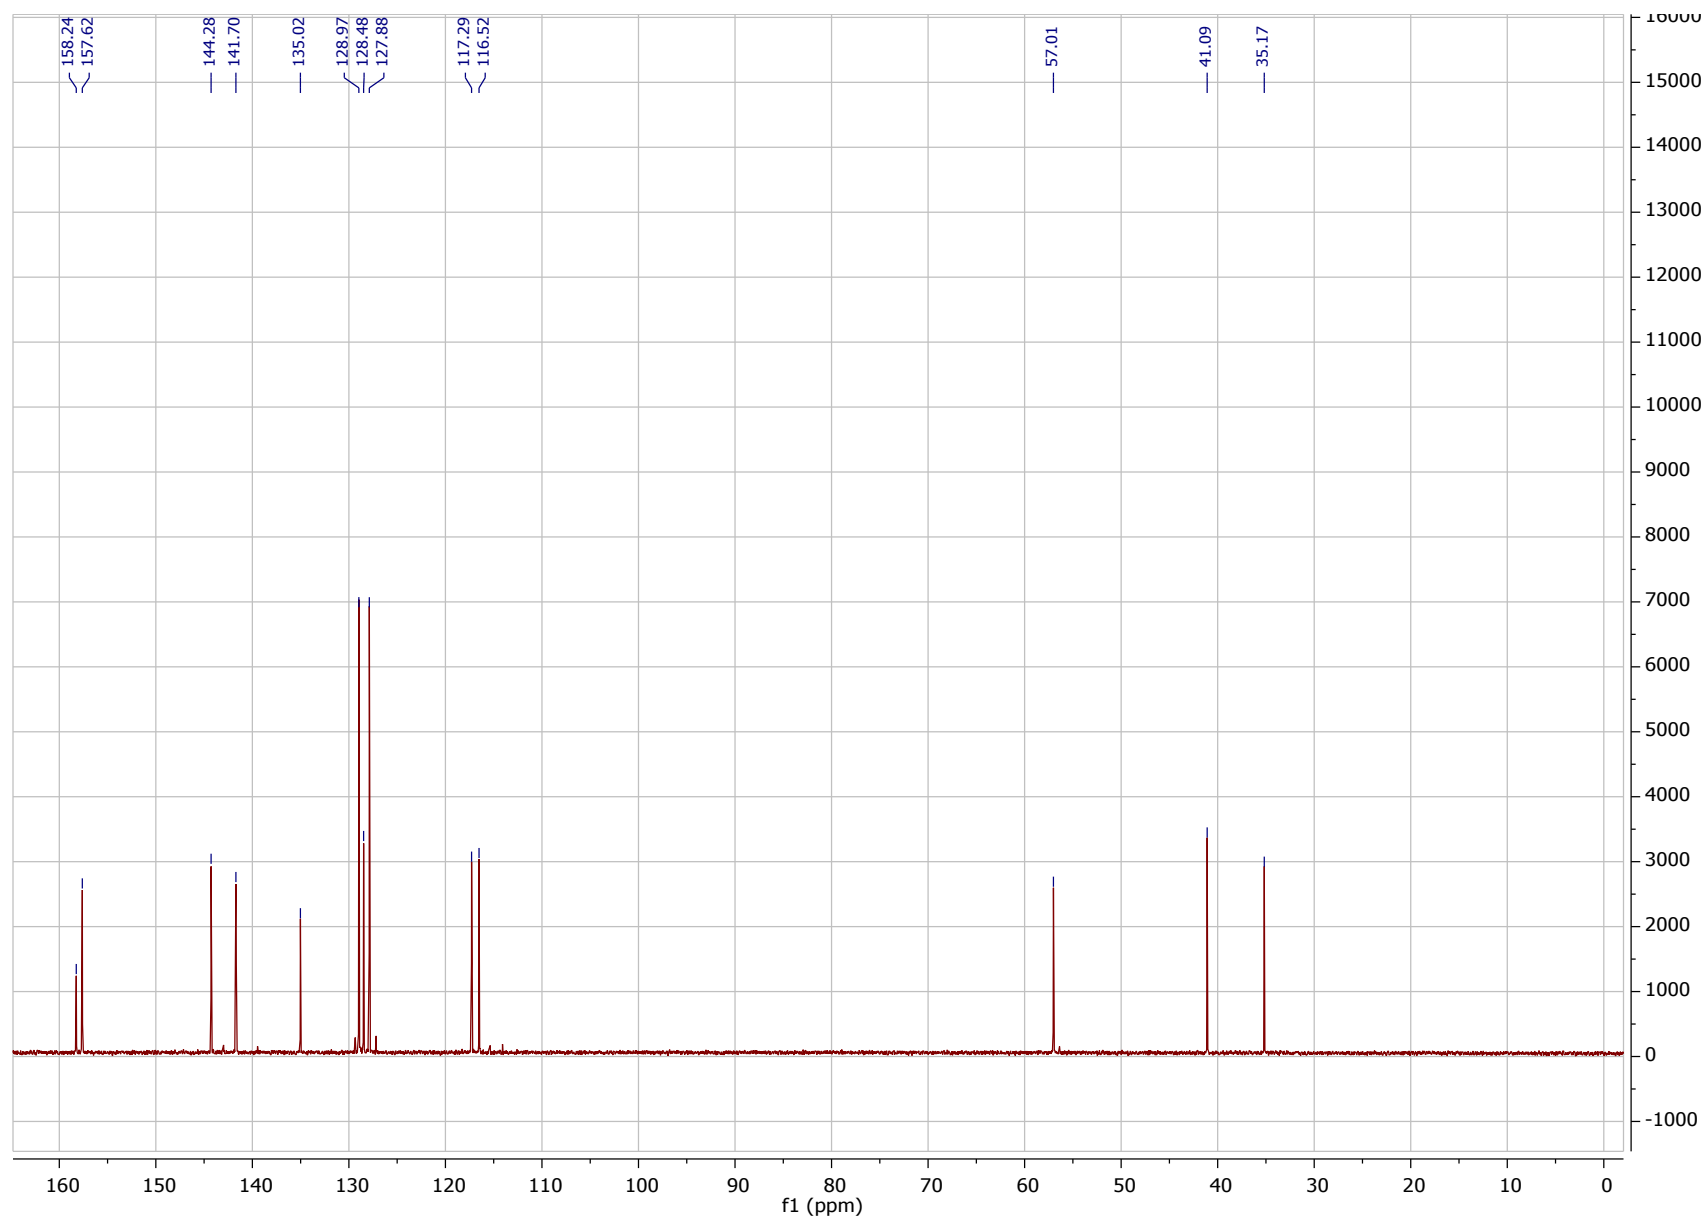

**<sup>1</sup>H NMR of 3-phenylimidazo[1,2-a]pyridine (3a):**

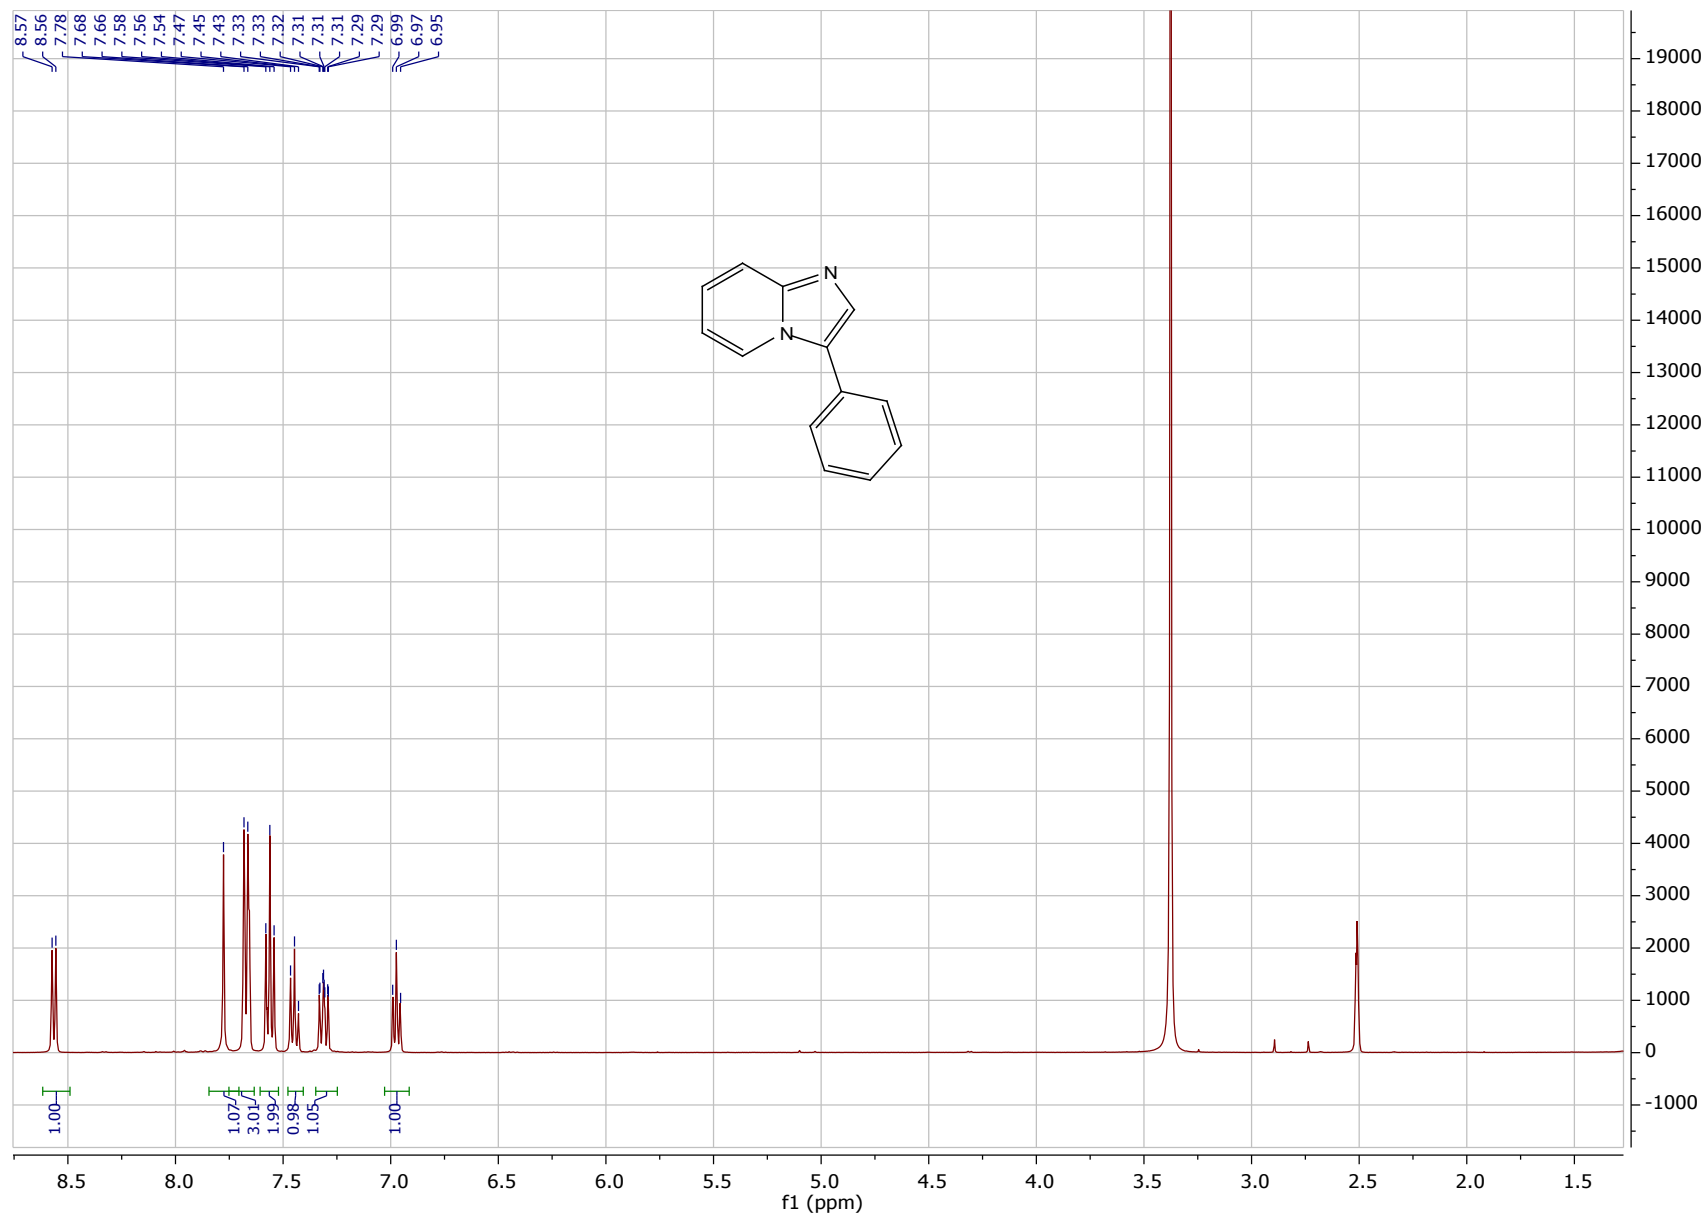

**<sup>13</sup>C NMR of 3-phenylimidazo[1,2-a]pyridine (3a):**

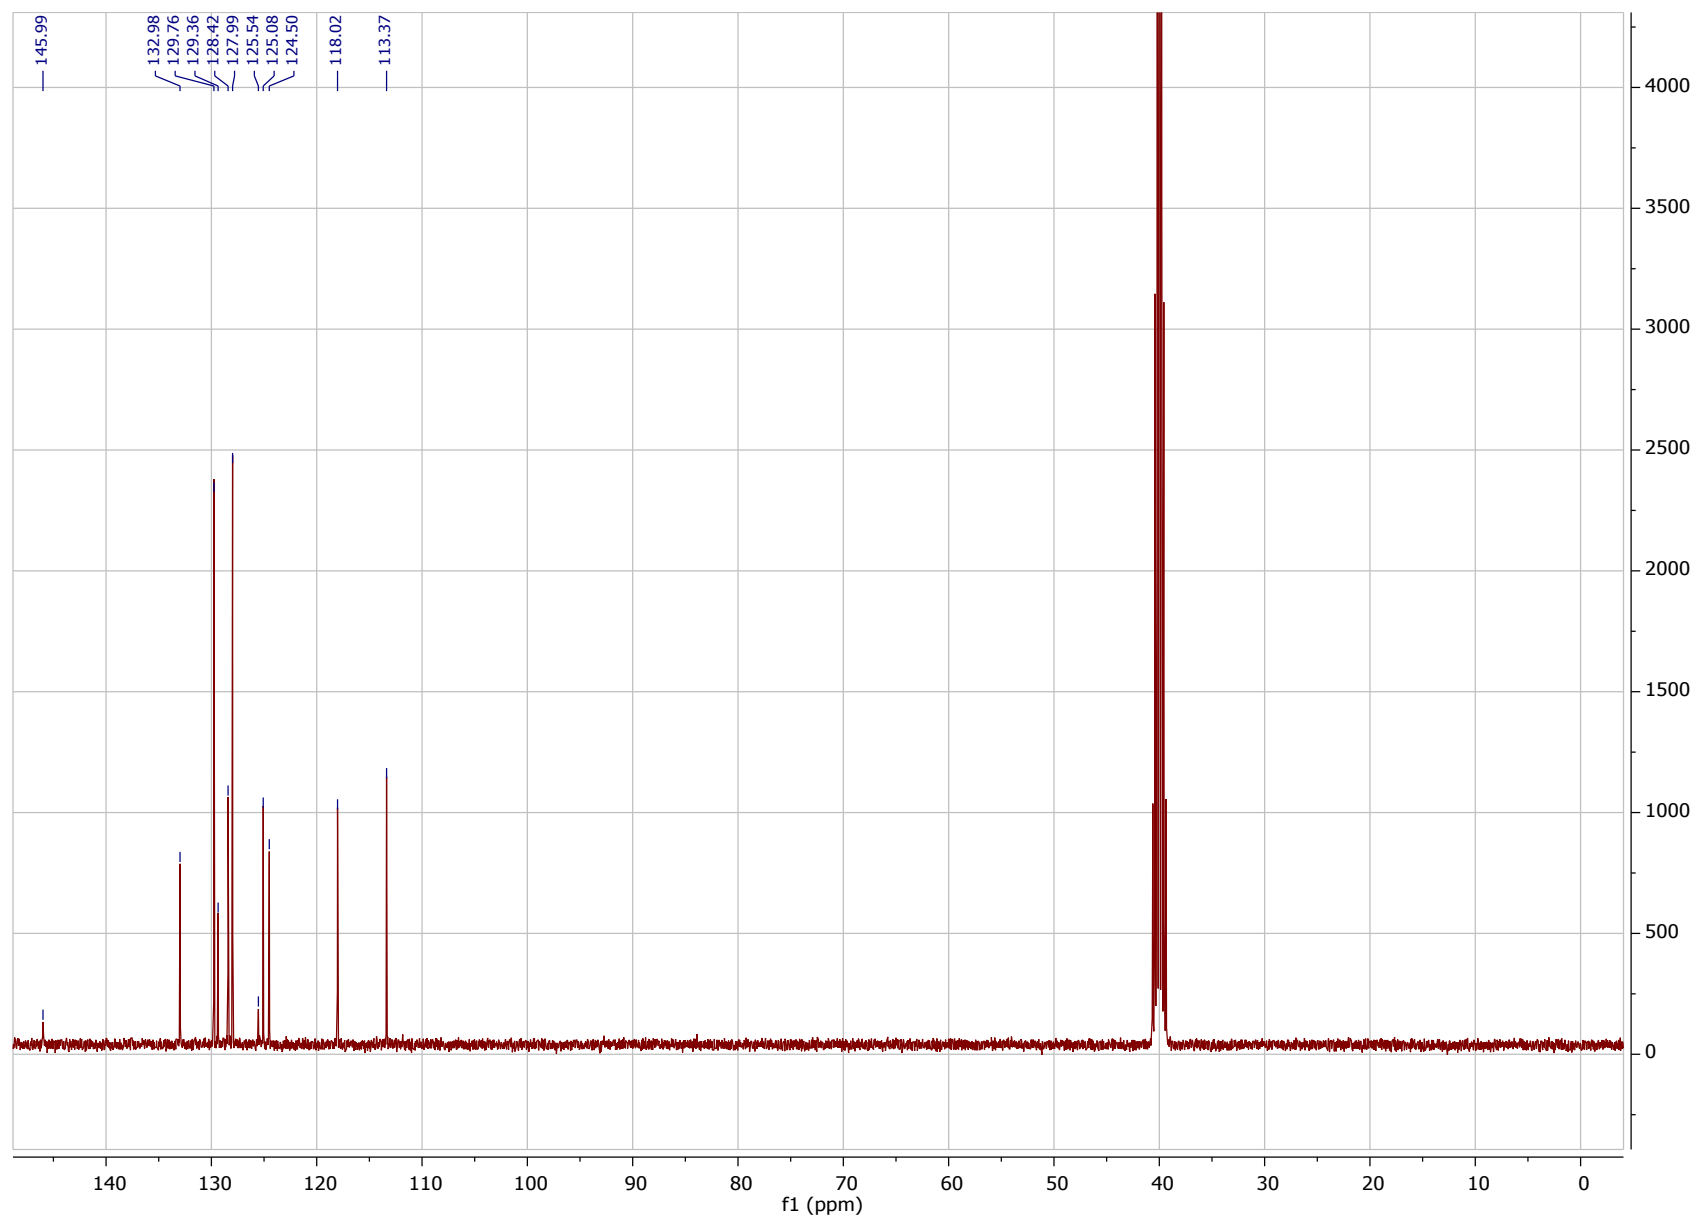

**<sup>1</sup>H NMR of 3-(naphthalen-2-yl)imidazo[1,2-a]pyridine (3b):**

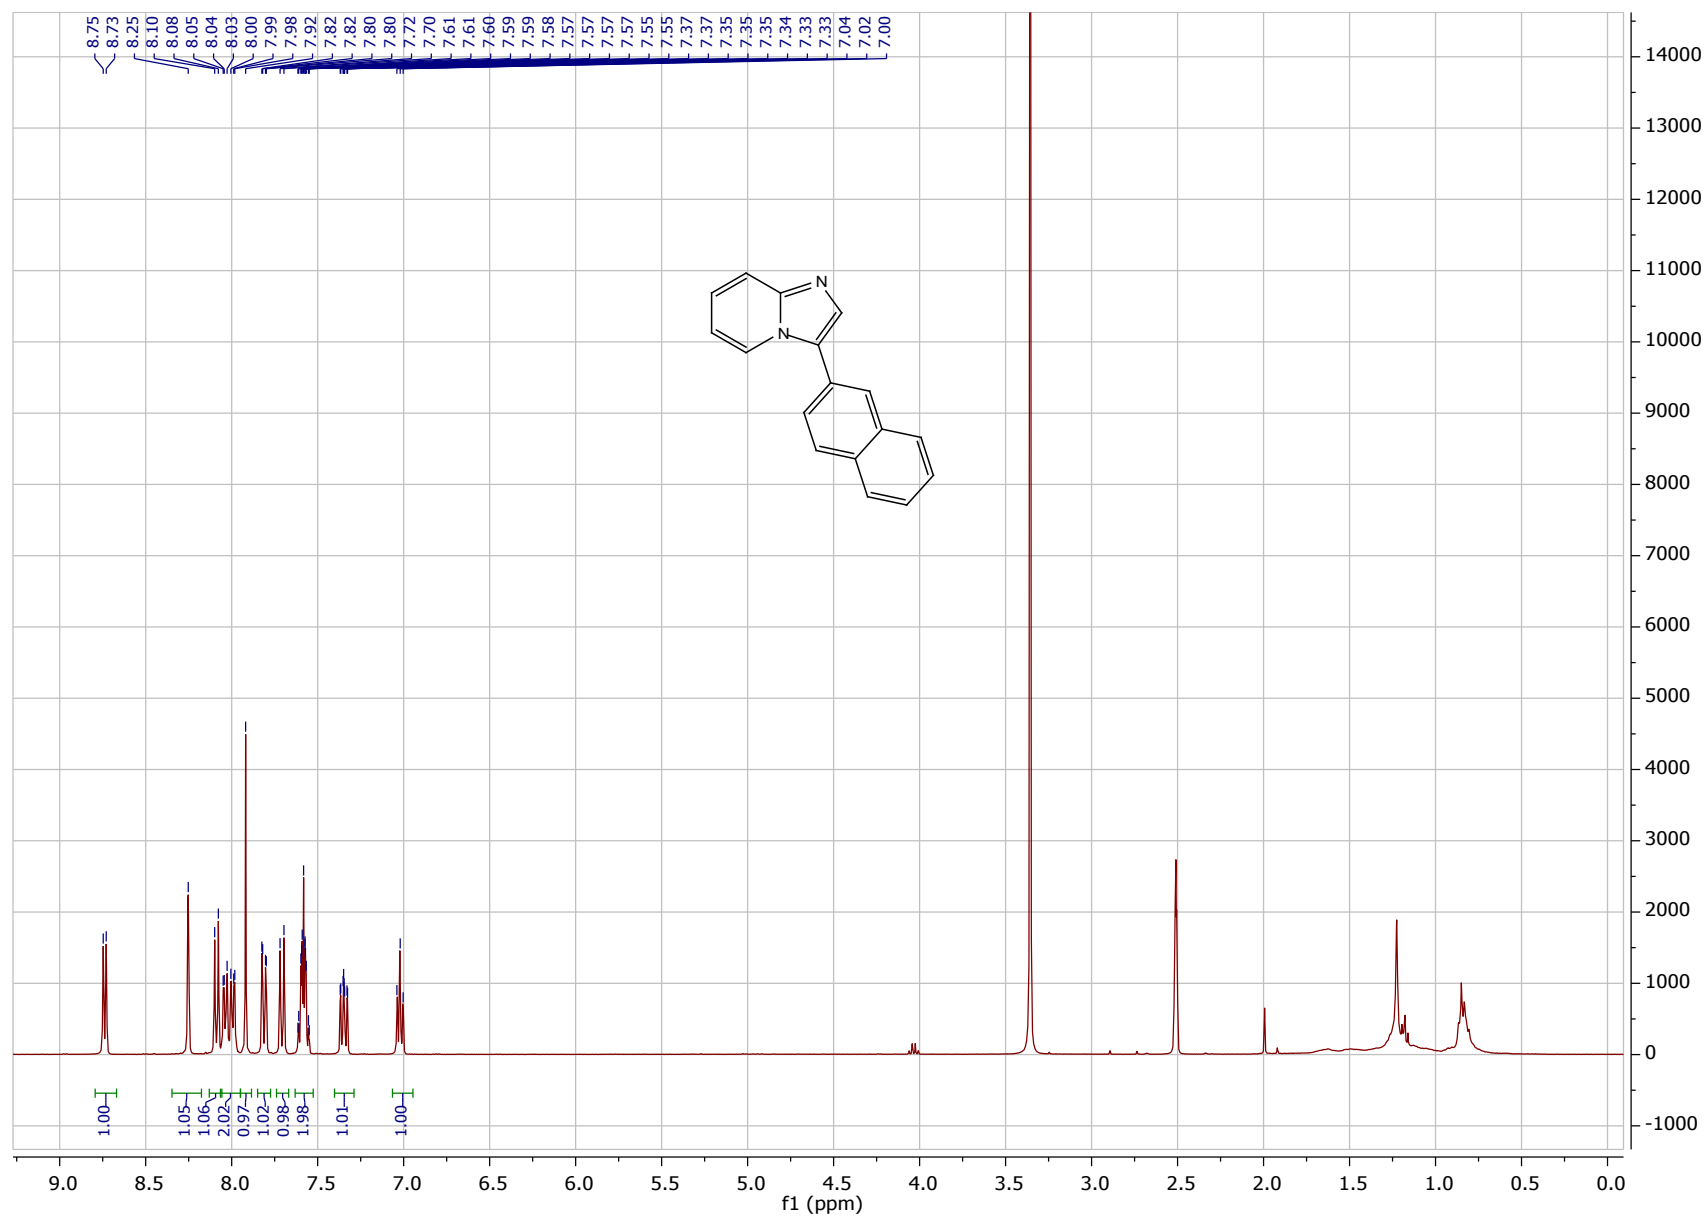

**<sup>13</sup>C NMR of 3-(naphthalen-2-yl)imidazo[1,2-a]pyridine (3b):**

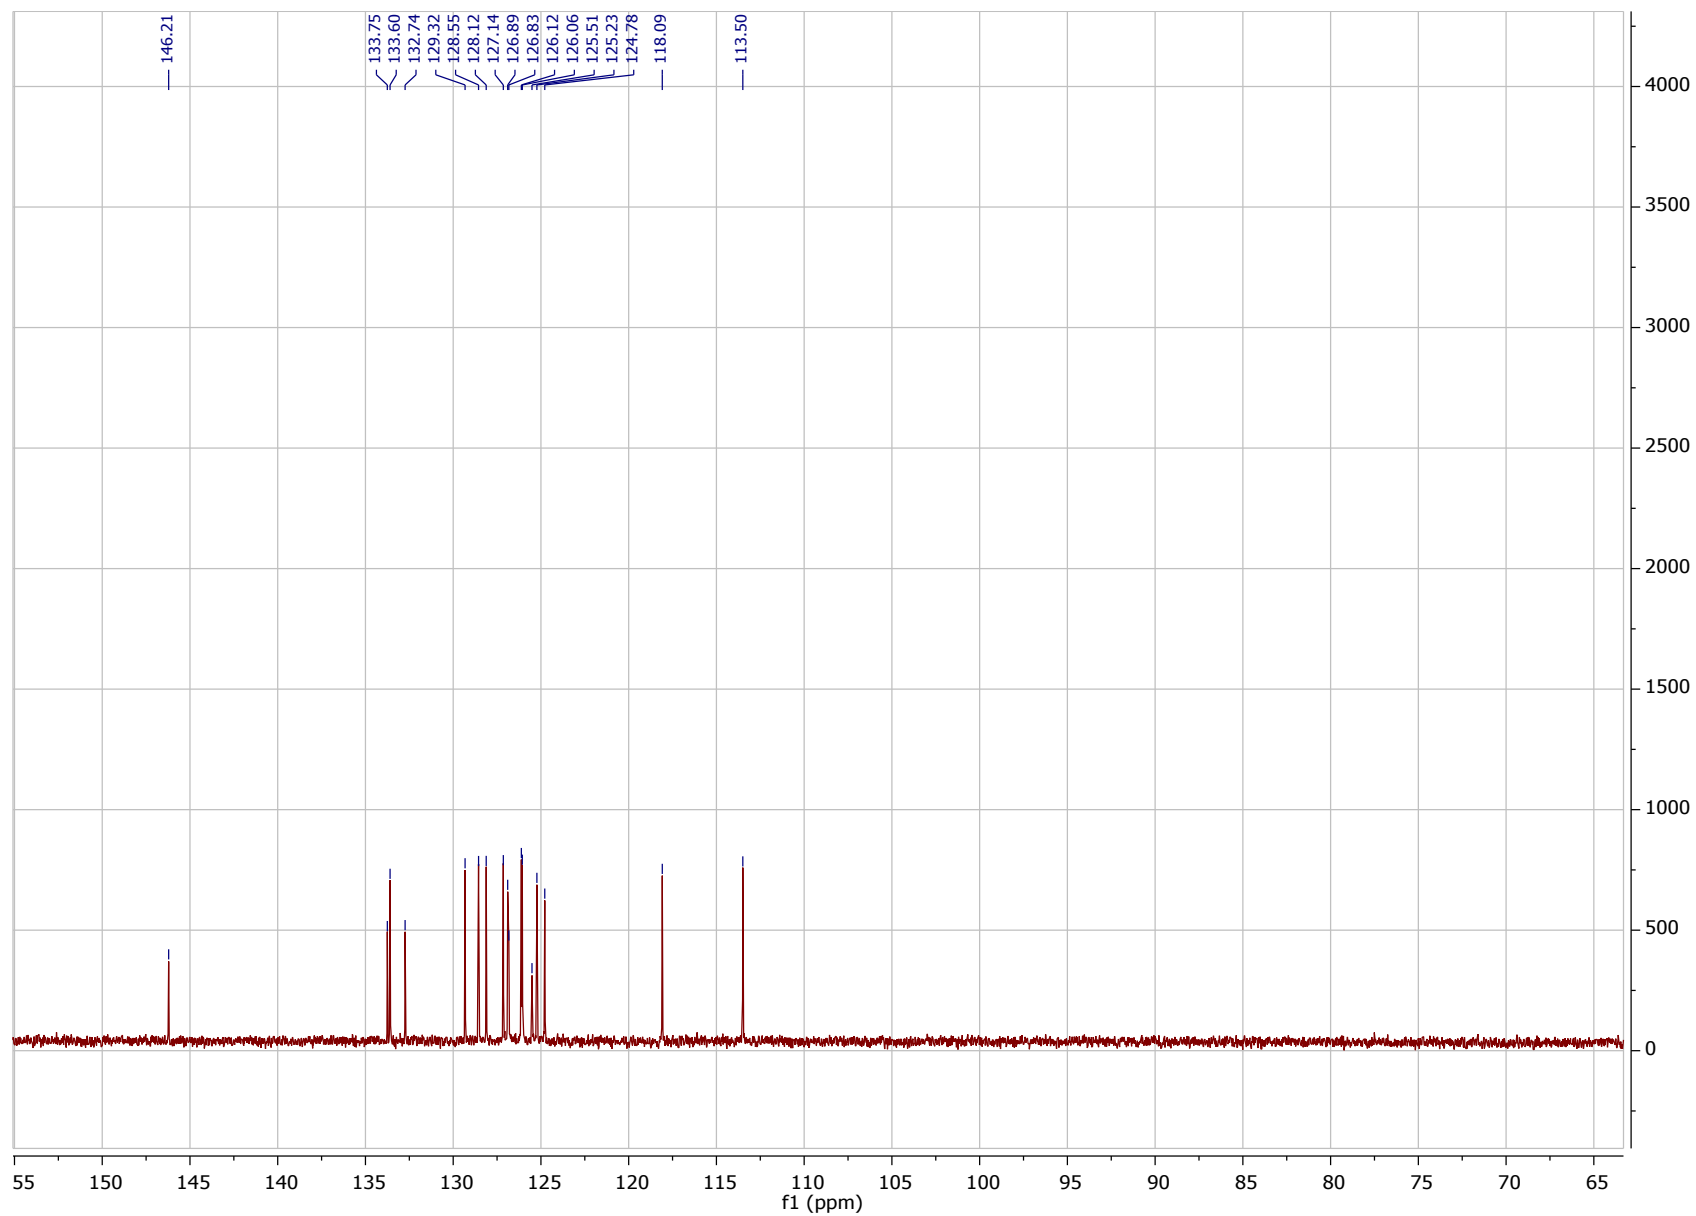

**<sup>1</sup>H NMR of 3-(2-chlorophenyl)imidazo[1,2-a]pyridine (3c):**

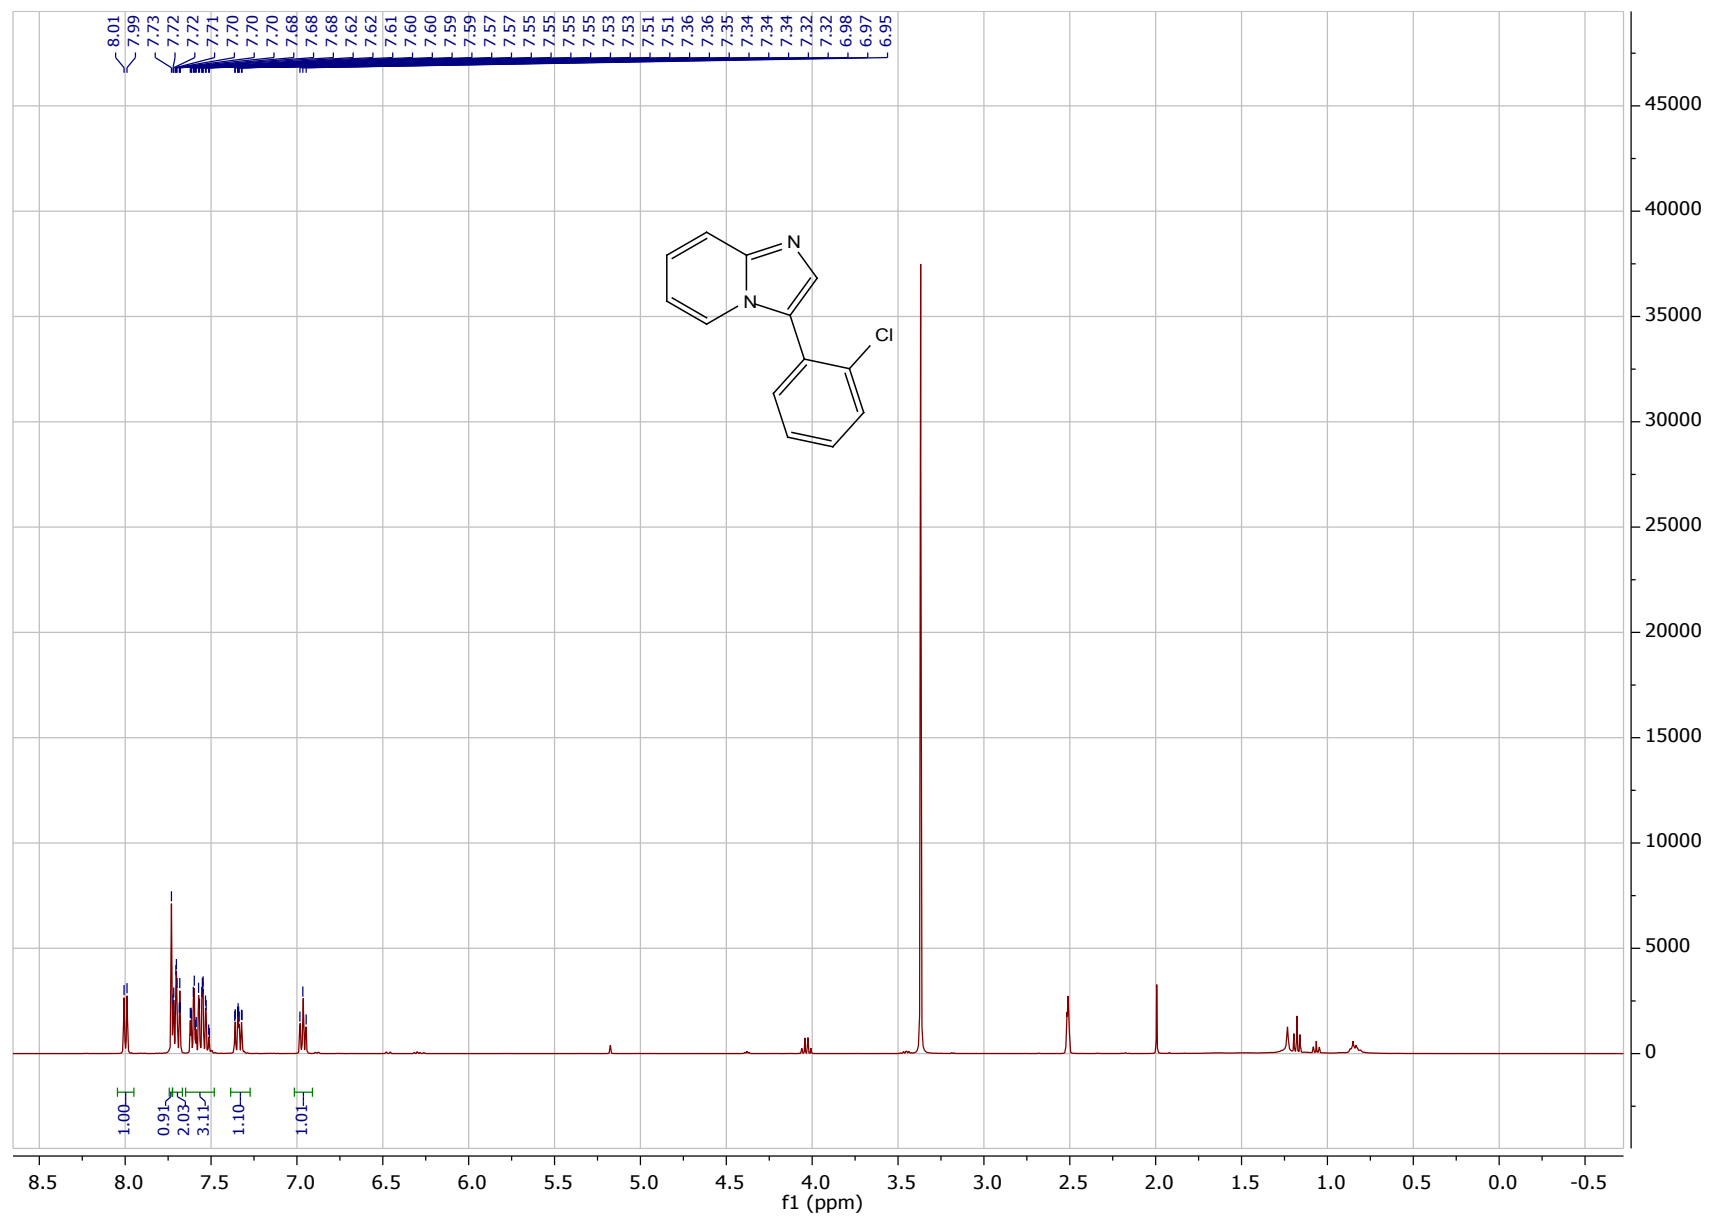

**<sup>13</sup>C NMR of 3-(2-chlorophenyl)imidazo[1,2-a]pyridine (3c):**

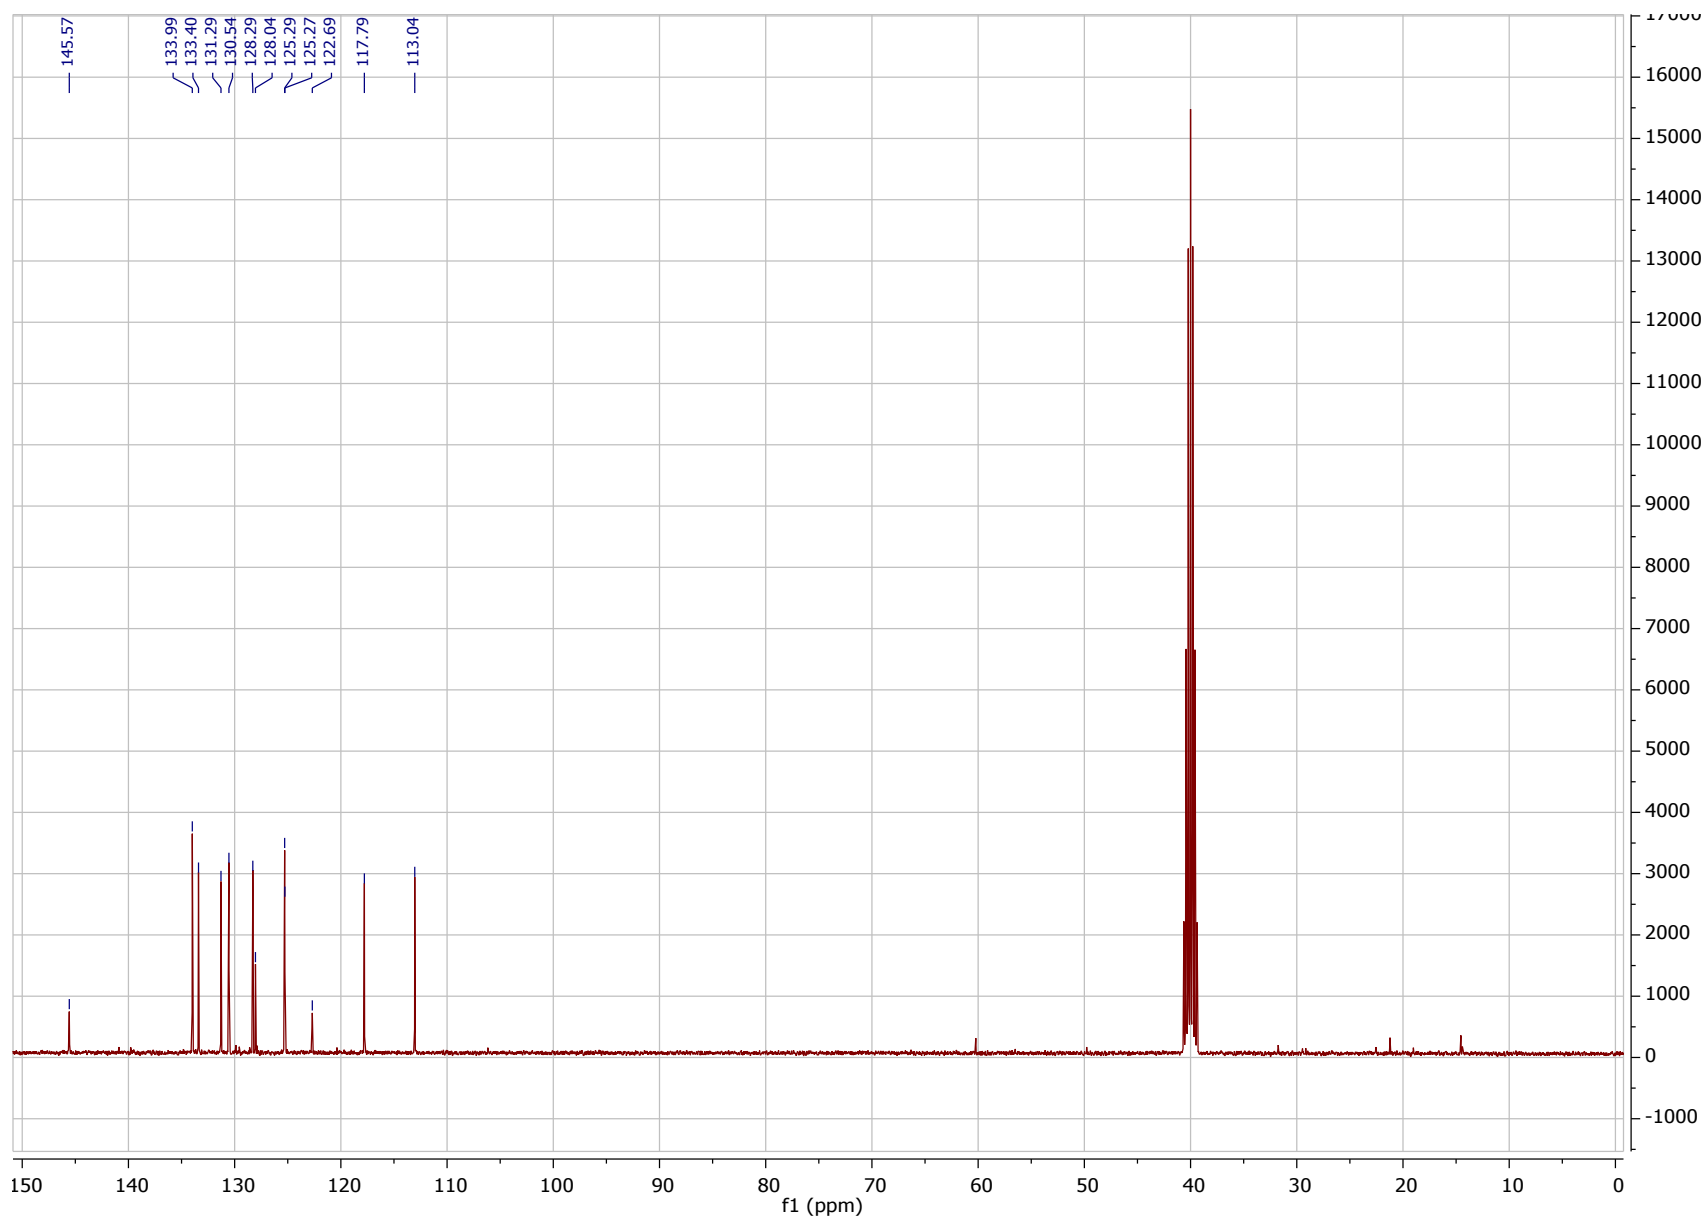

**<sup>1</sup>H NMR of 3-(2-(trifluoromethyl)phenyl)imidazo[1,2-a]pyridine (3d):**

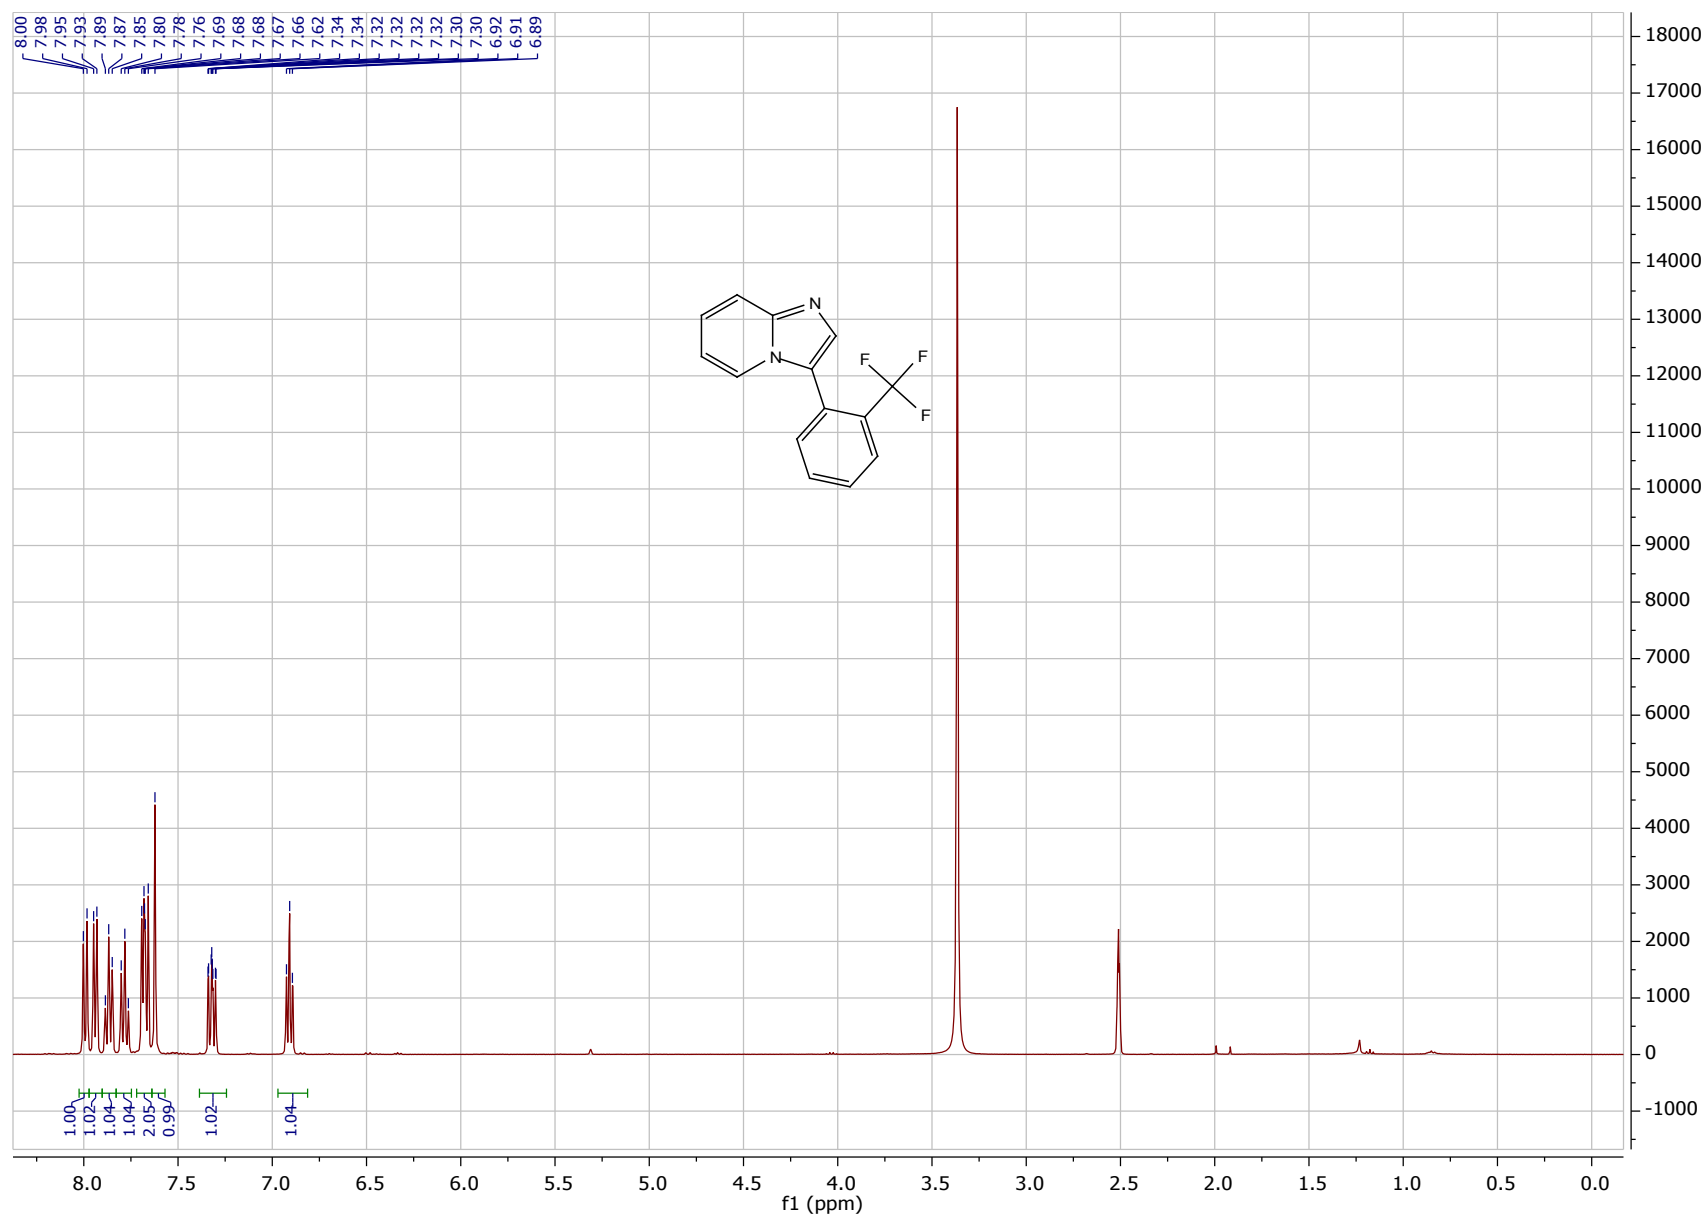



**<sup>13</sup>C NMR of 3-(2-(trifluoromethyl)phenyl)imidazo[1,2-a]pyridine (3d):**

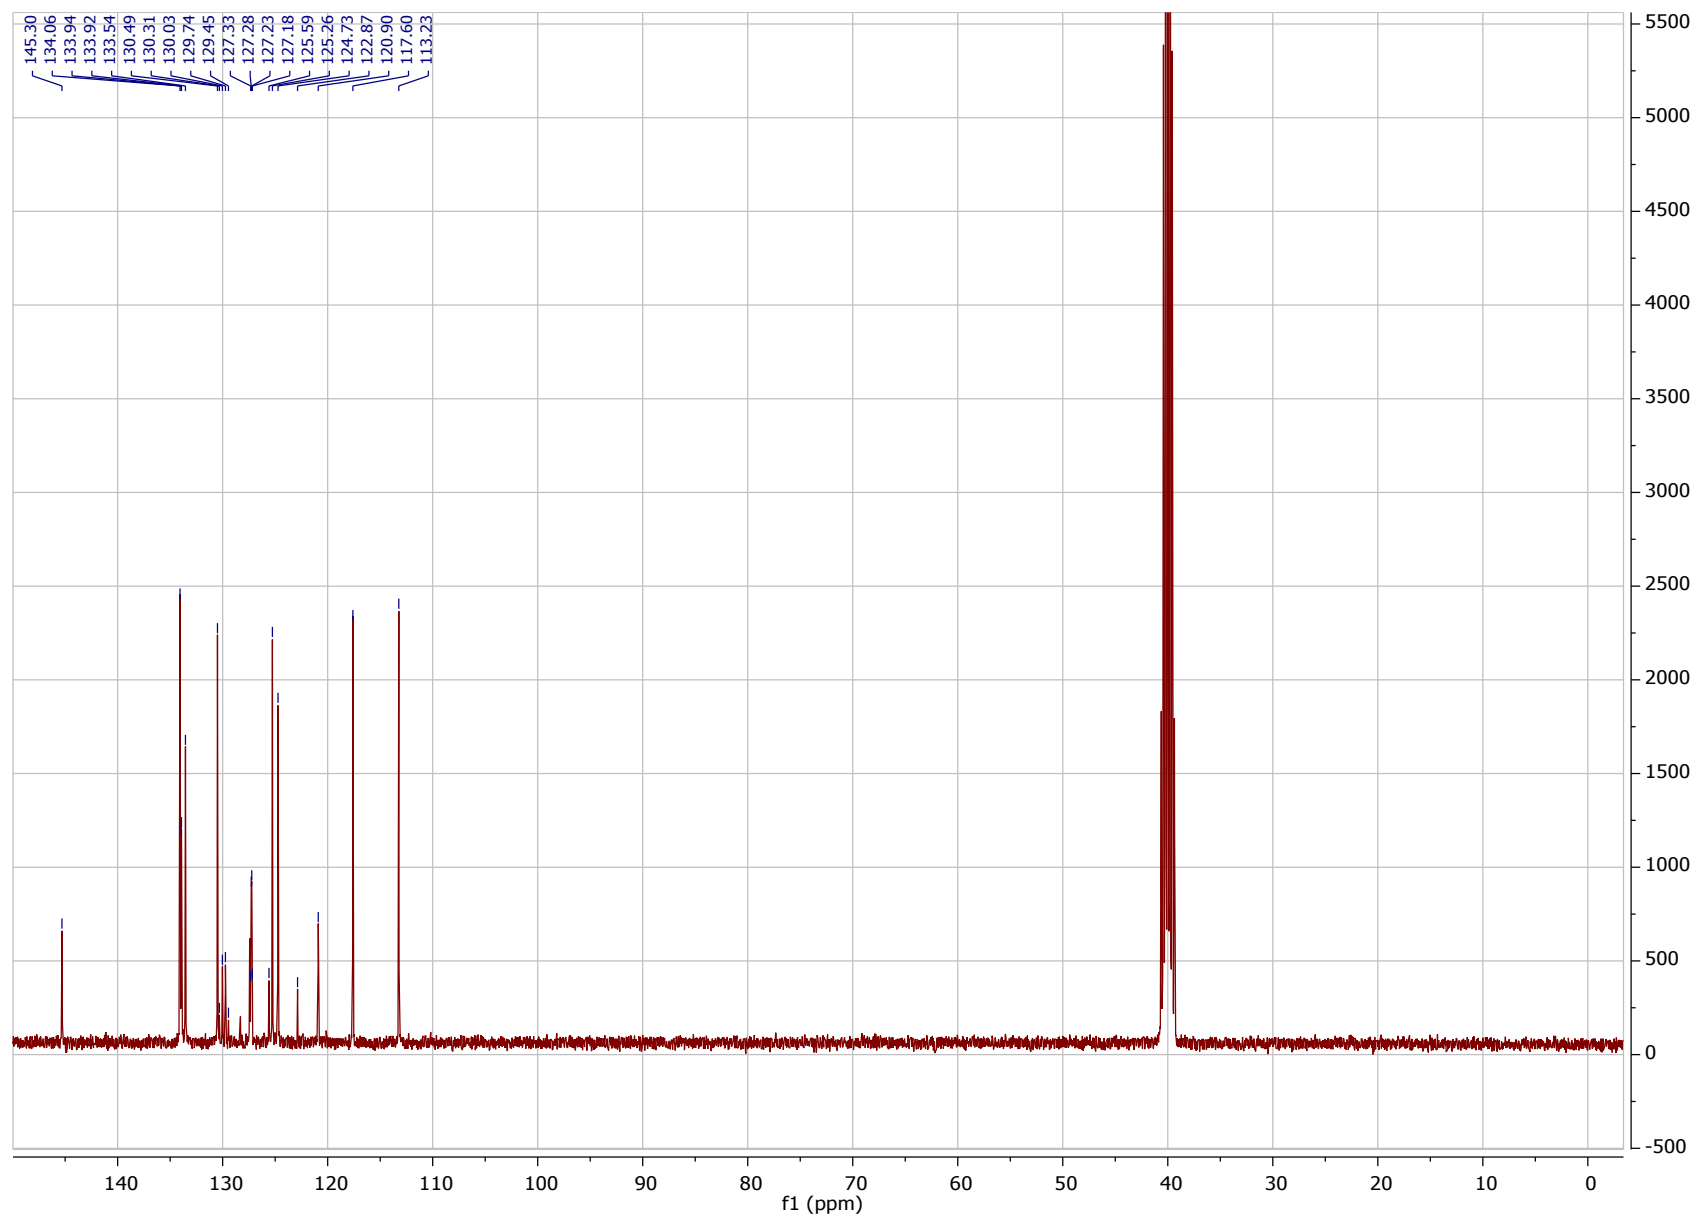

**<sup>1</sup>H NMR of 3-(3-nitrophenyl)imidazo[1,2-a]pyridine (3e):**

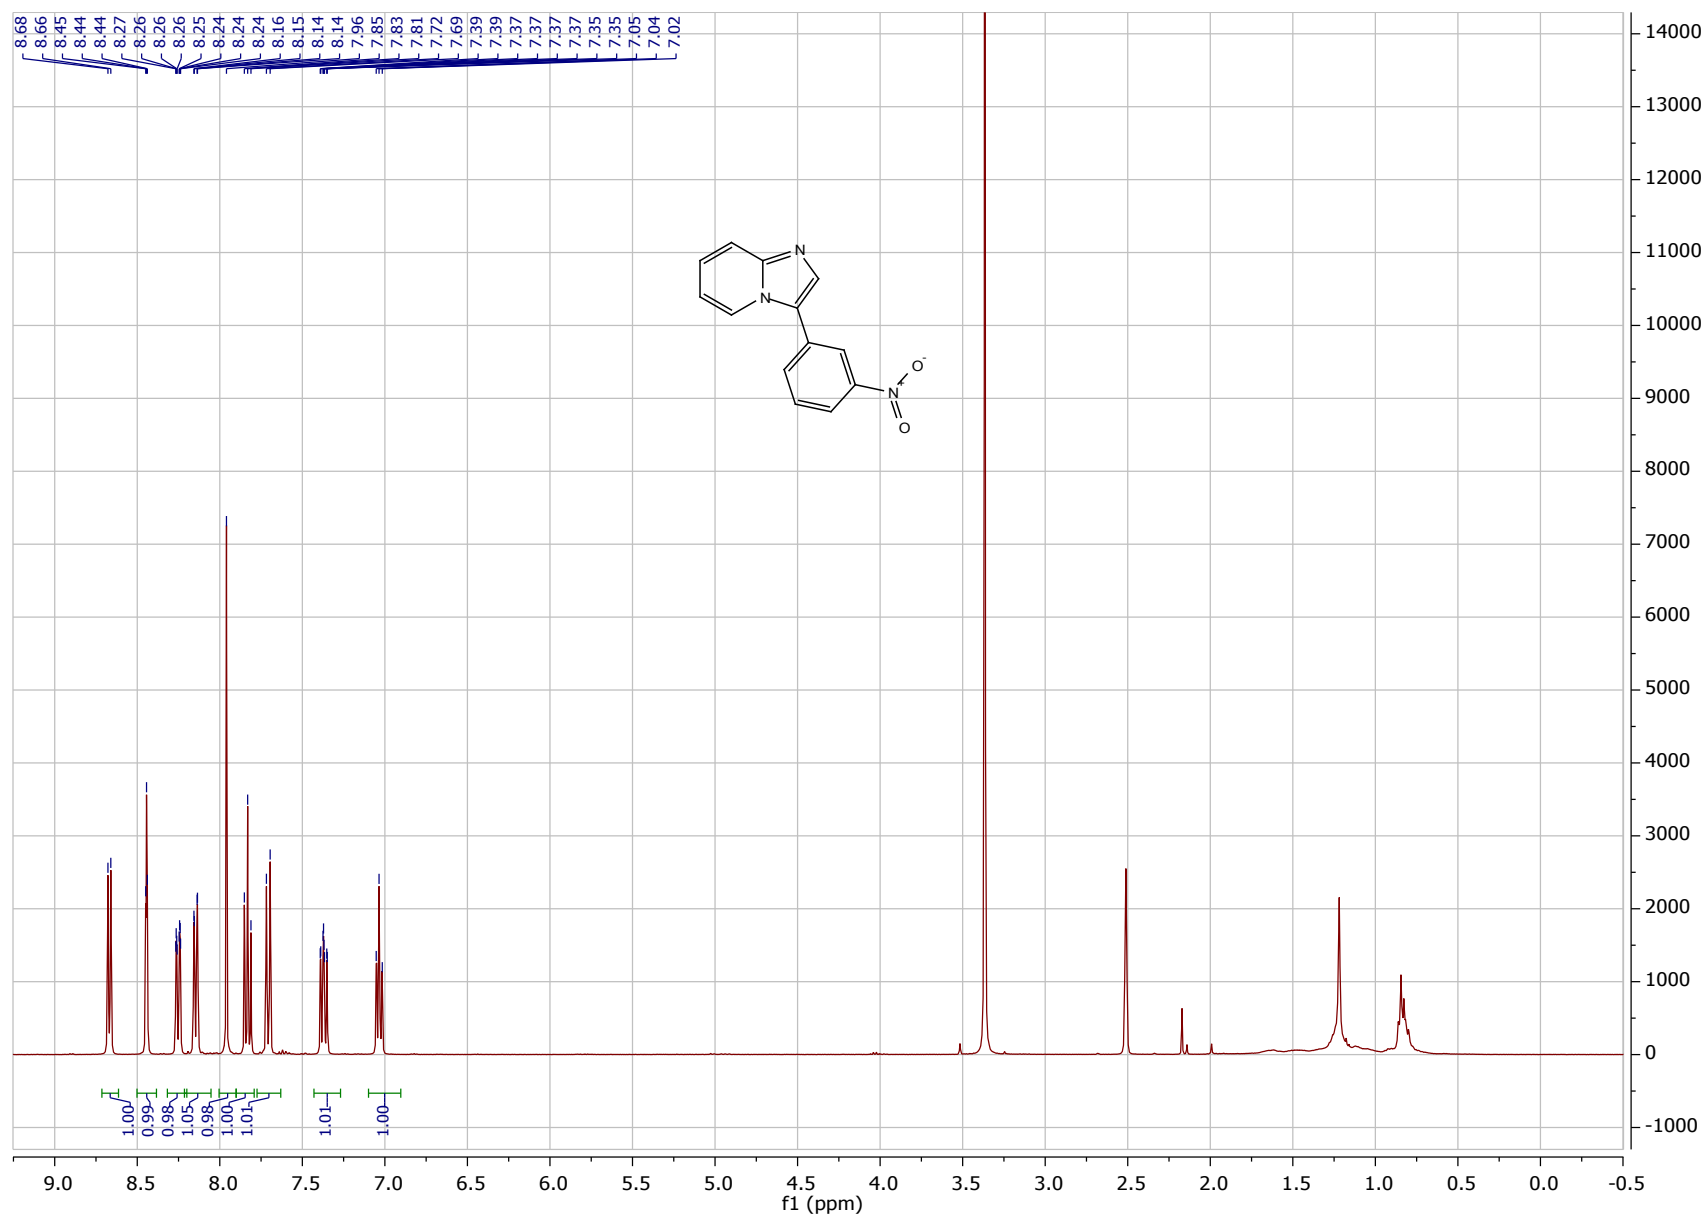

**<sup>13</sup>C NMR of 3-(3-nitrophenyl)imidazo[1,2-a]pyridine (3e):**

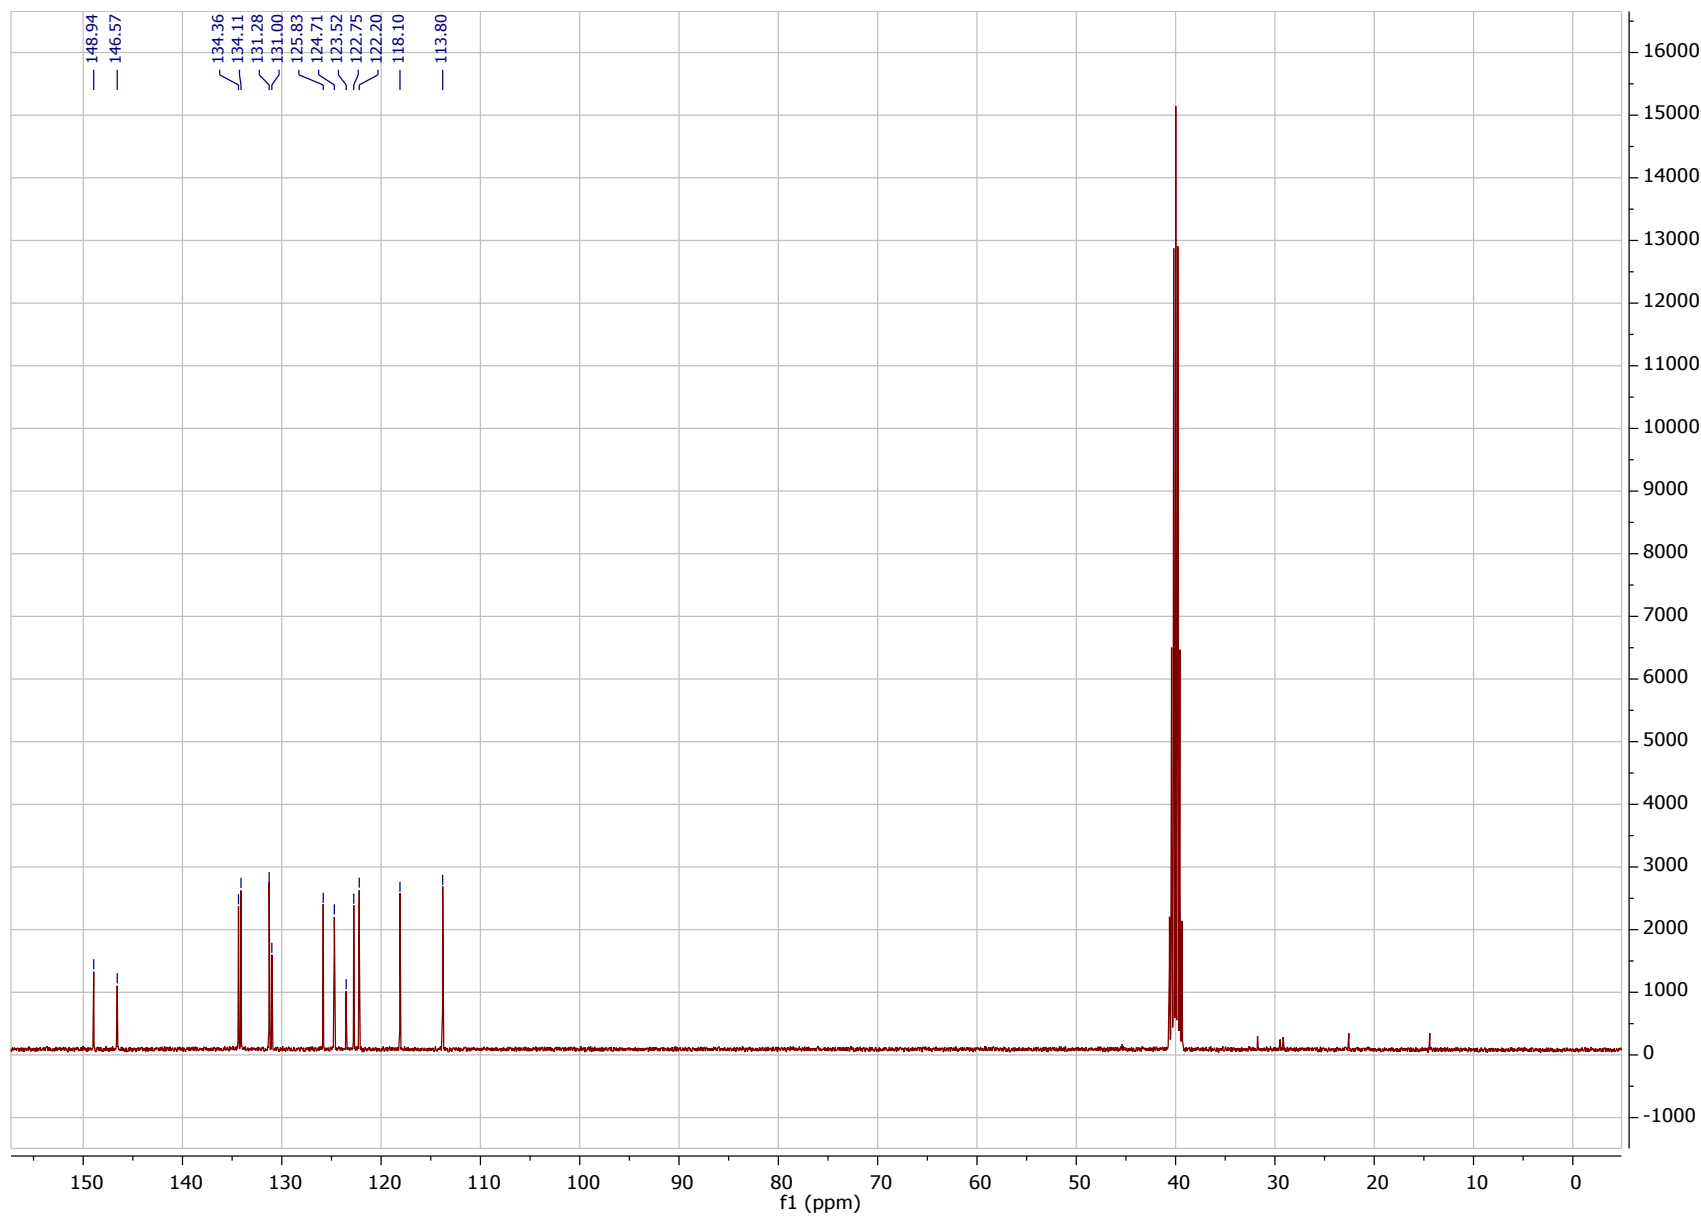

**<sup>1</sup>H NMR of 3-(3-(trifluoromethyl)phenyl)imidazo[1,2-a]pyridine (3f):**

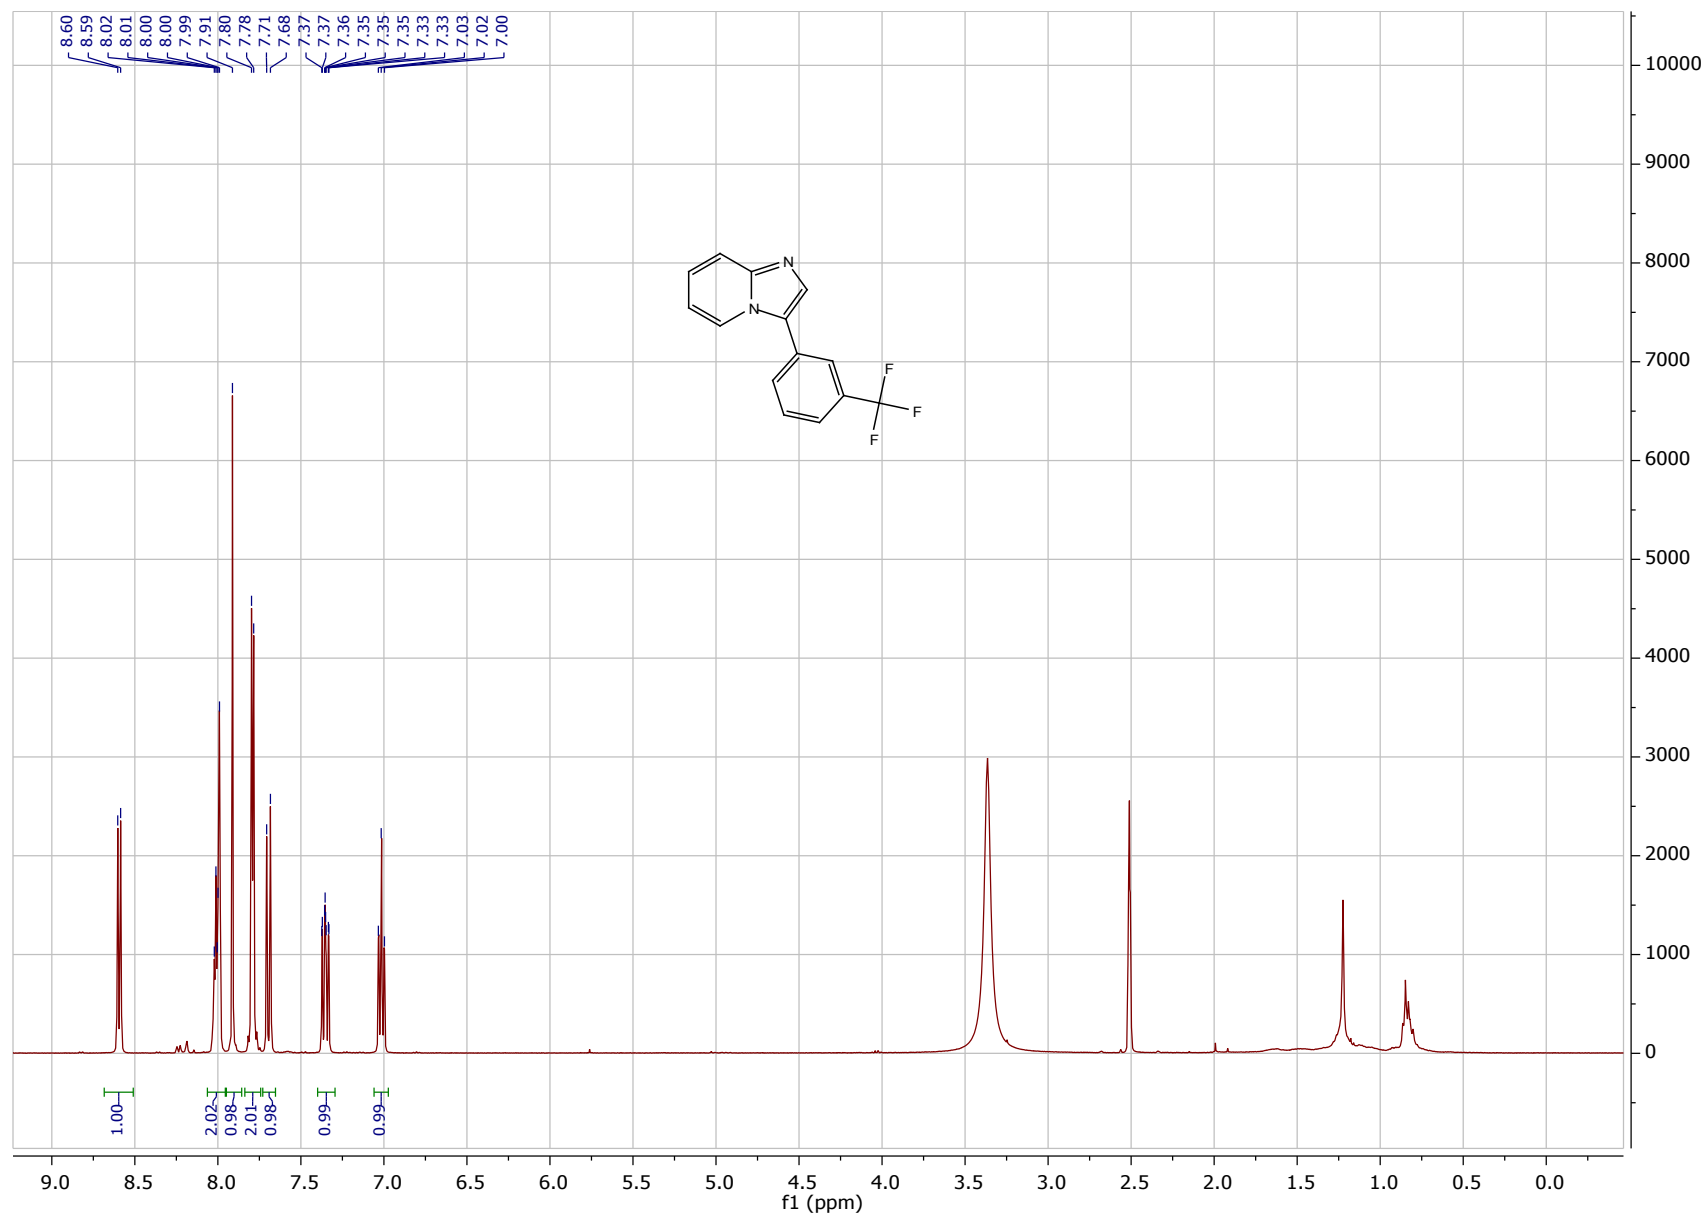

**<sup>13</sup>C NMR of 3-(3-(trifluoromethyl)phenyl)imidazo[1,2-a]pyridine (3f):**

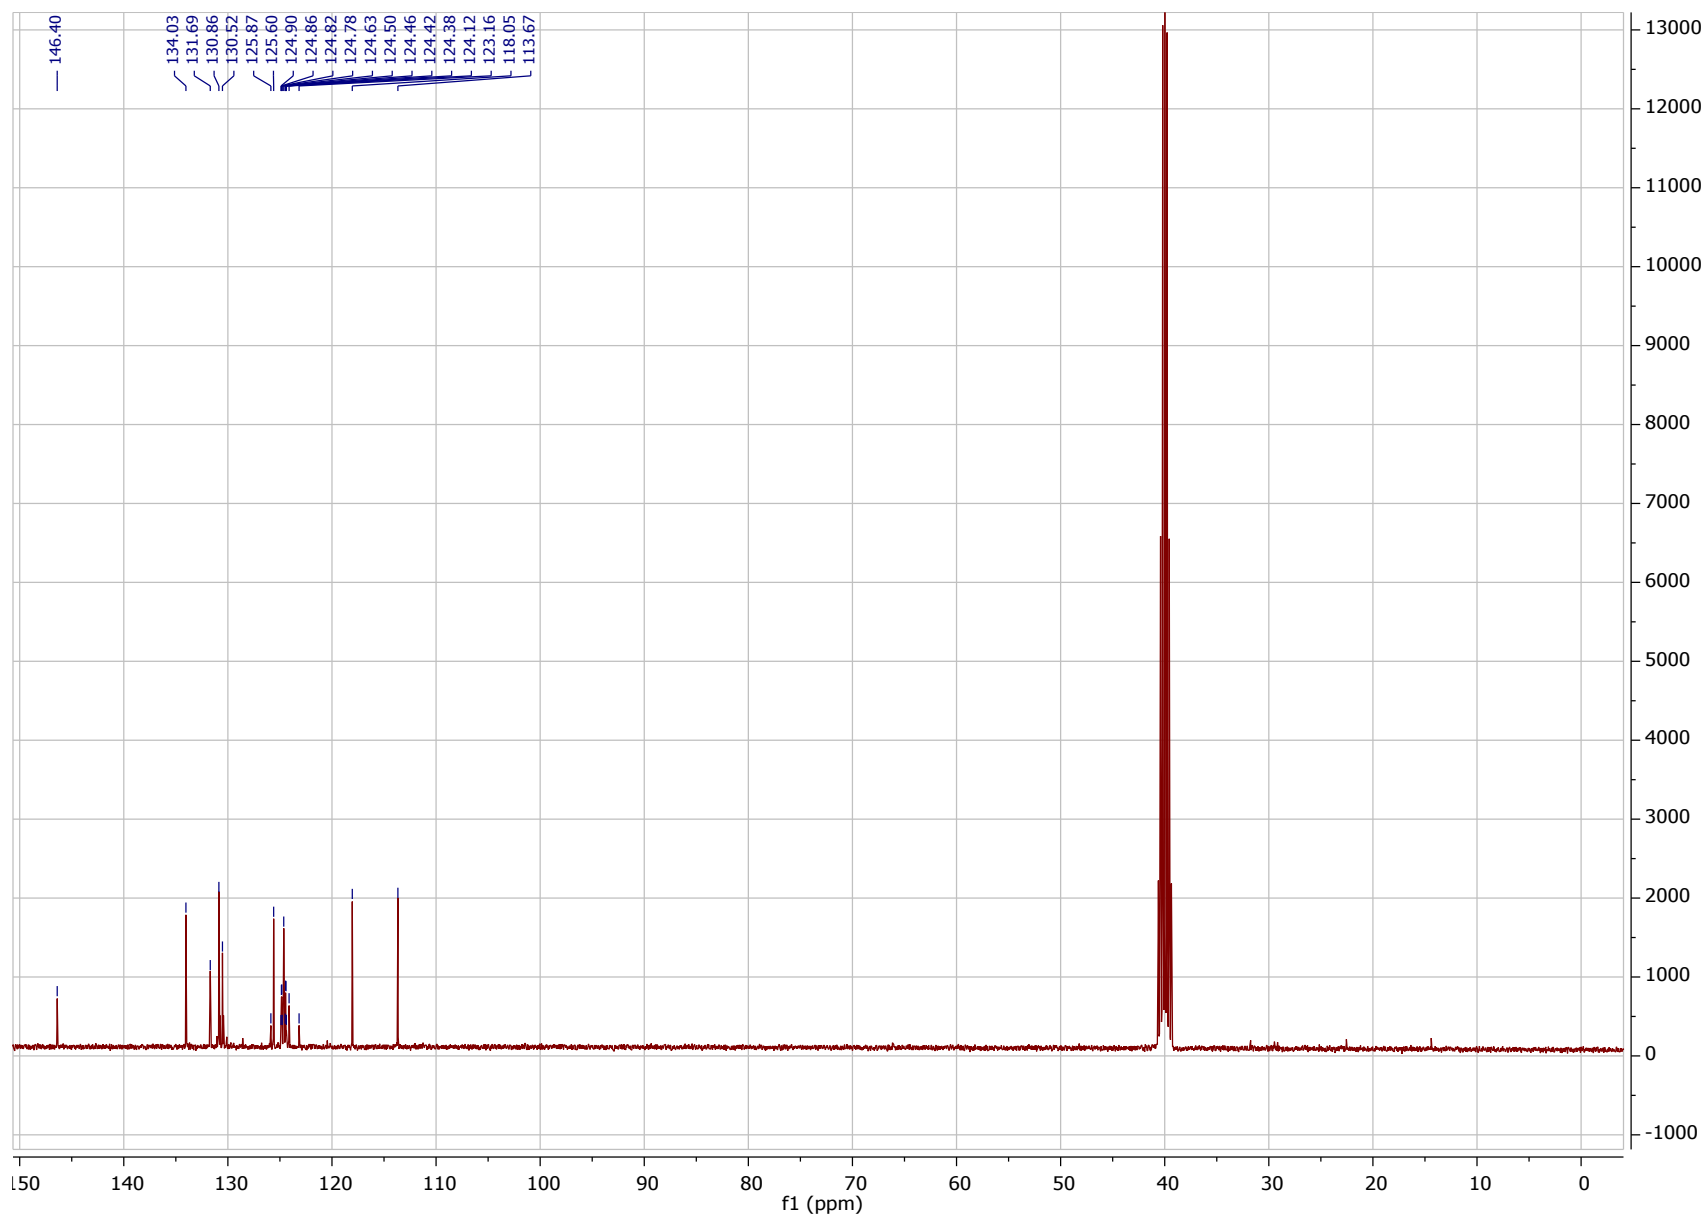

**<sup>1</sup>H NMR of 3-(3-chlorophenyl)imidazo[1,2-a]pyridine (3g):**

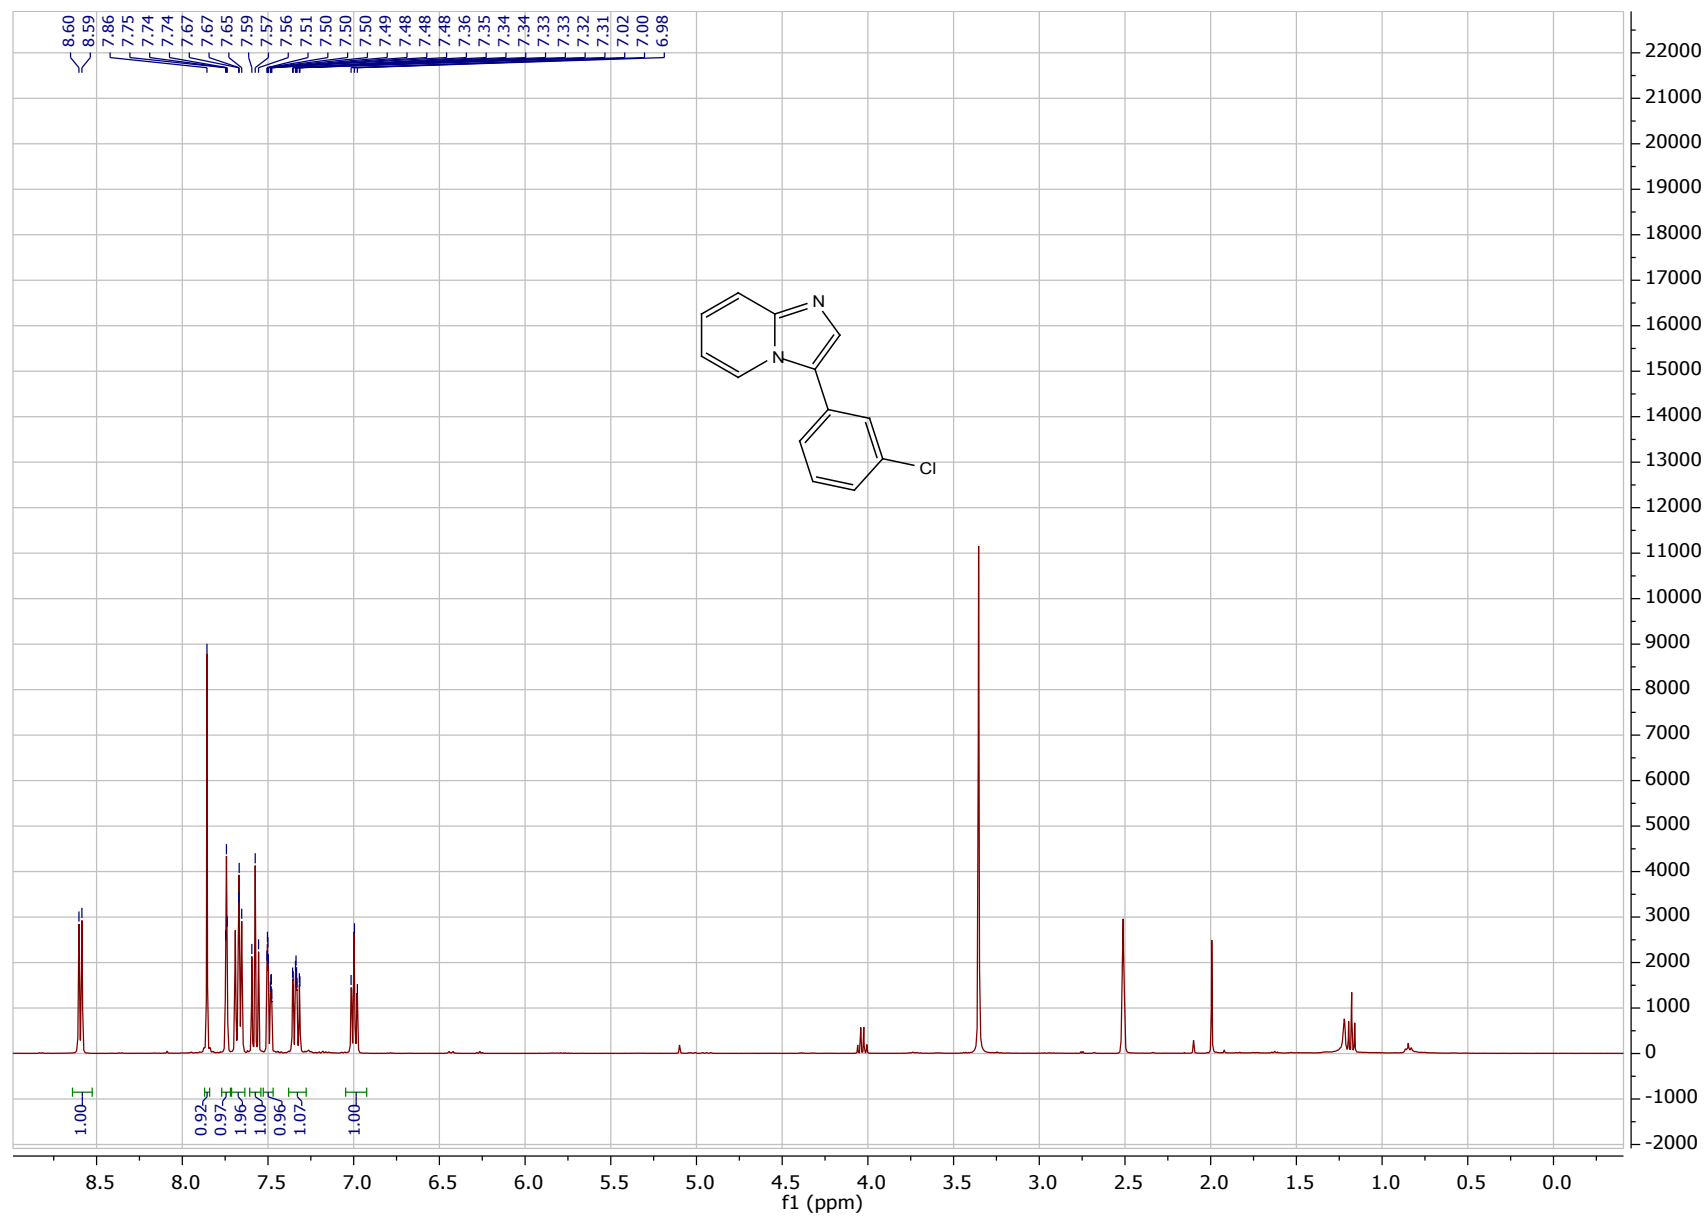

**<sup>13</sup>C NMR of 3-(3-chlorophenyl)imidazo[1,2-a]pyridine (3g):**

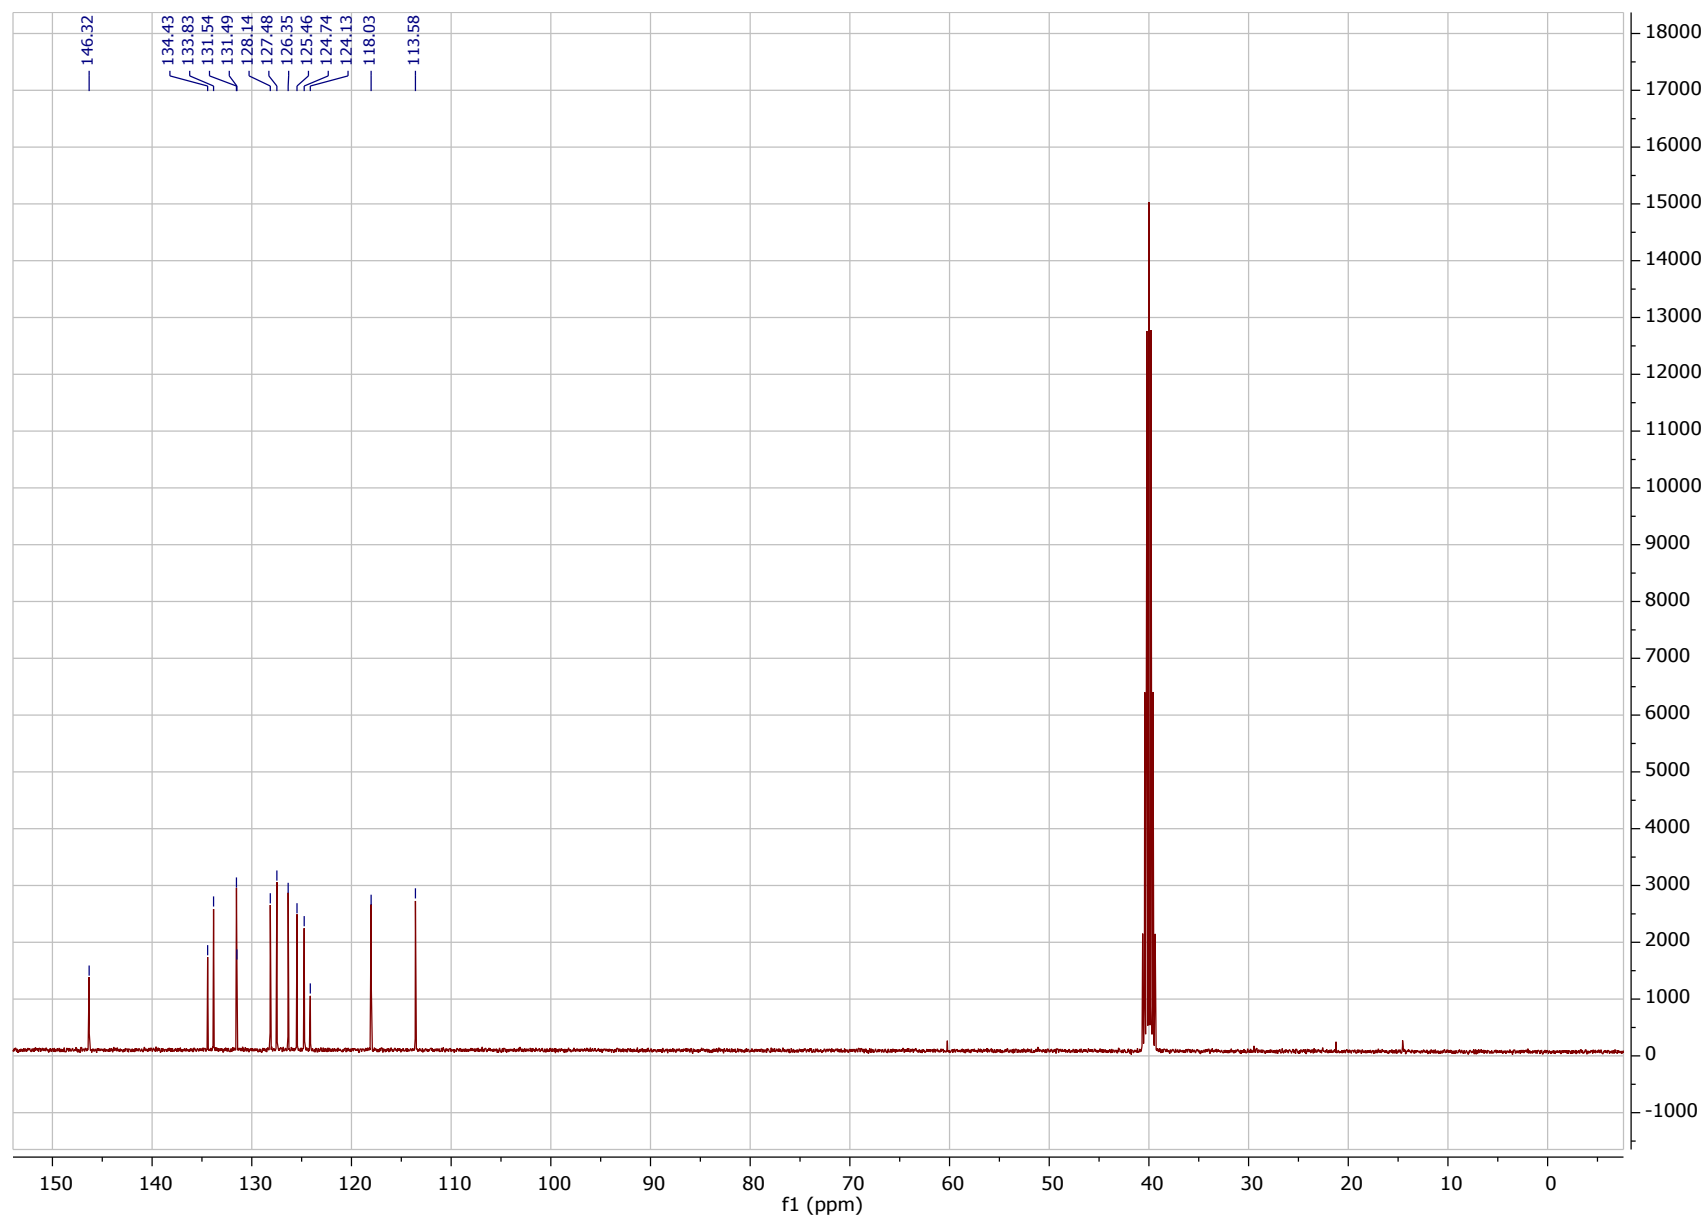

**<sup>1</sup>H NMR of 3-(3-fluorophenyl)imidazo[1,2-a]pyridine (3h):**

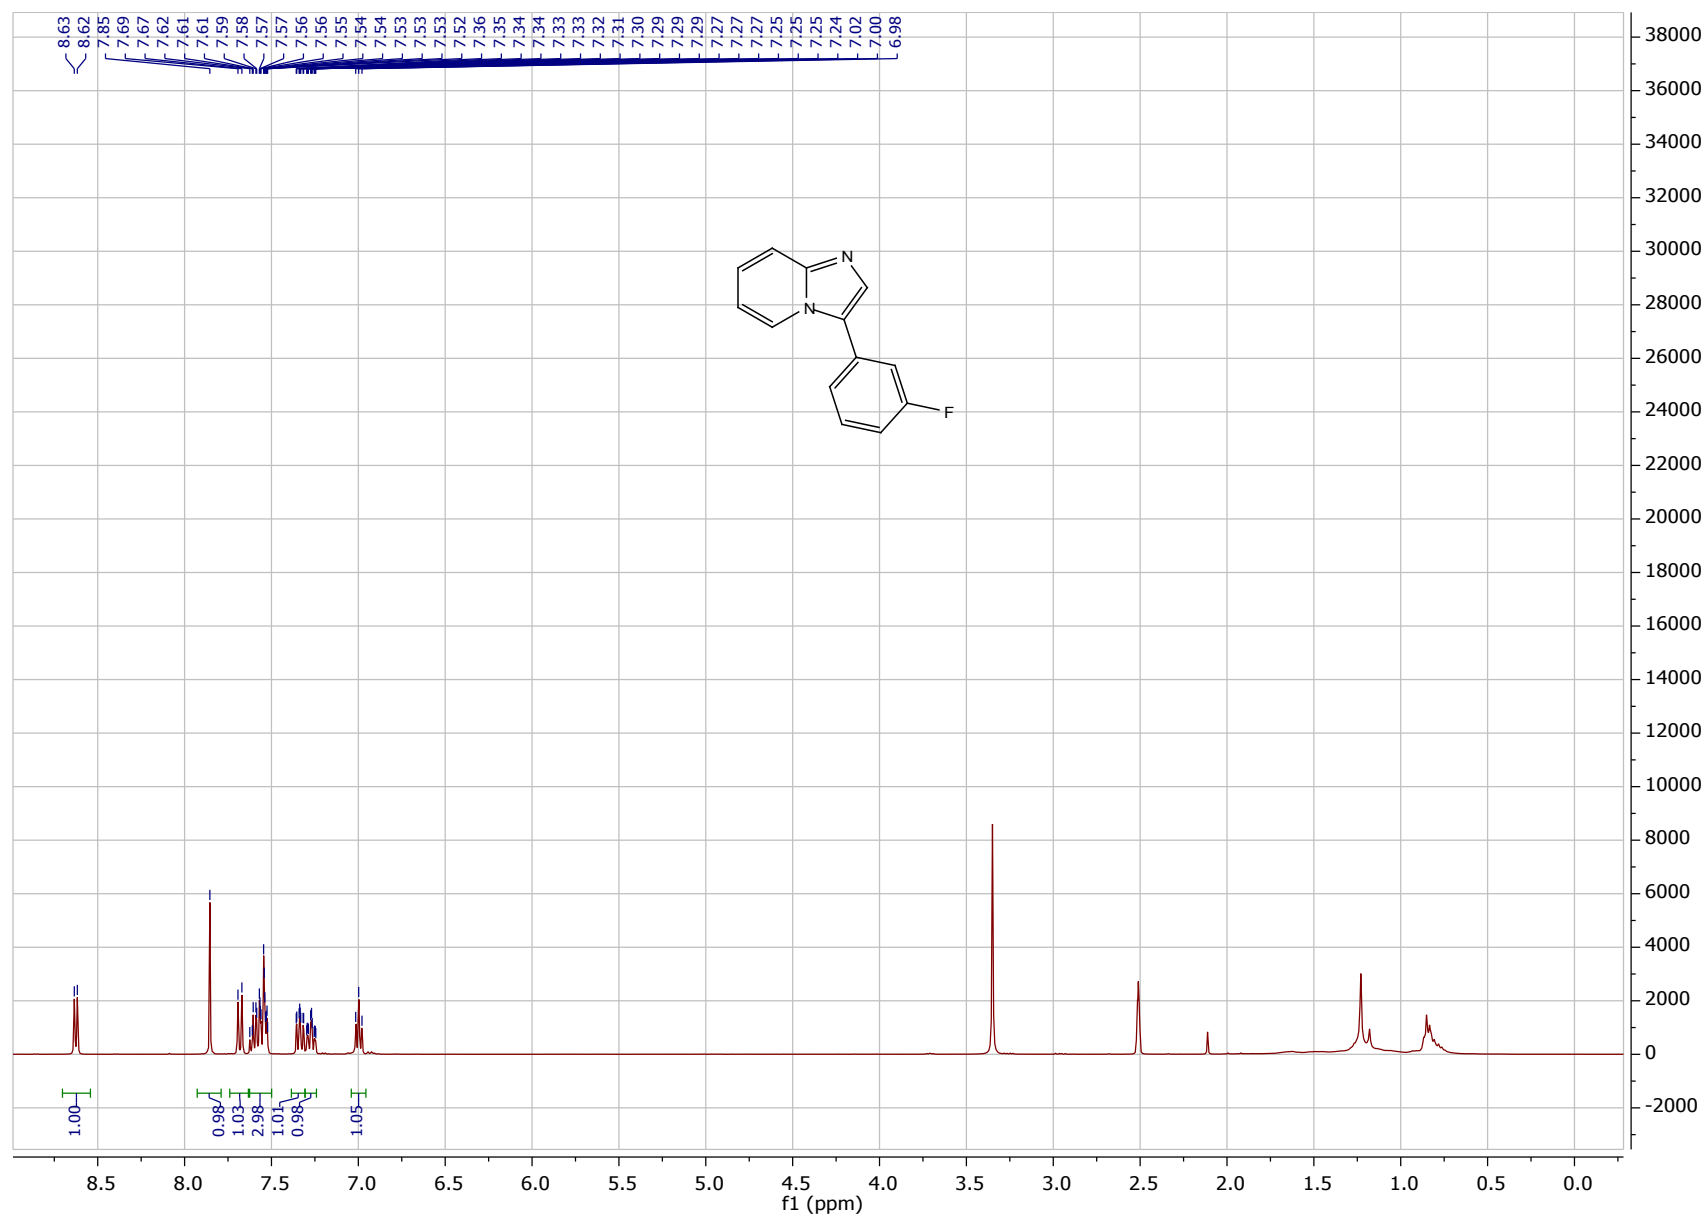



**<sup>13</sup>C NMR of 3-(3-fluorophenyl)imidazo[1,2-a]pyridine (3h):**

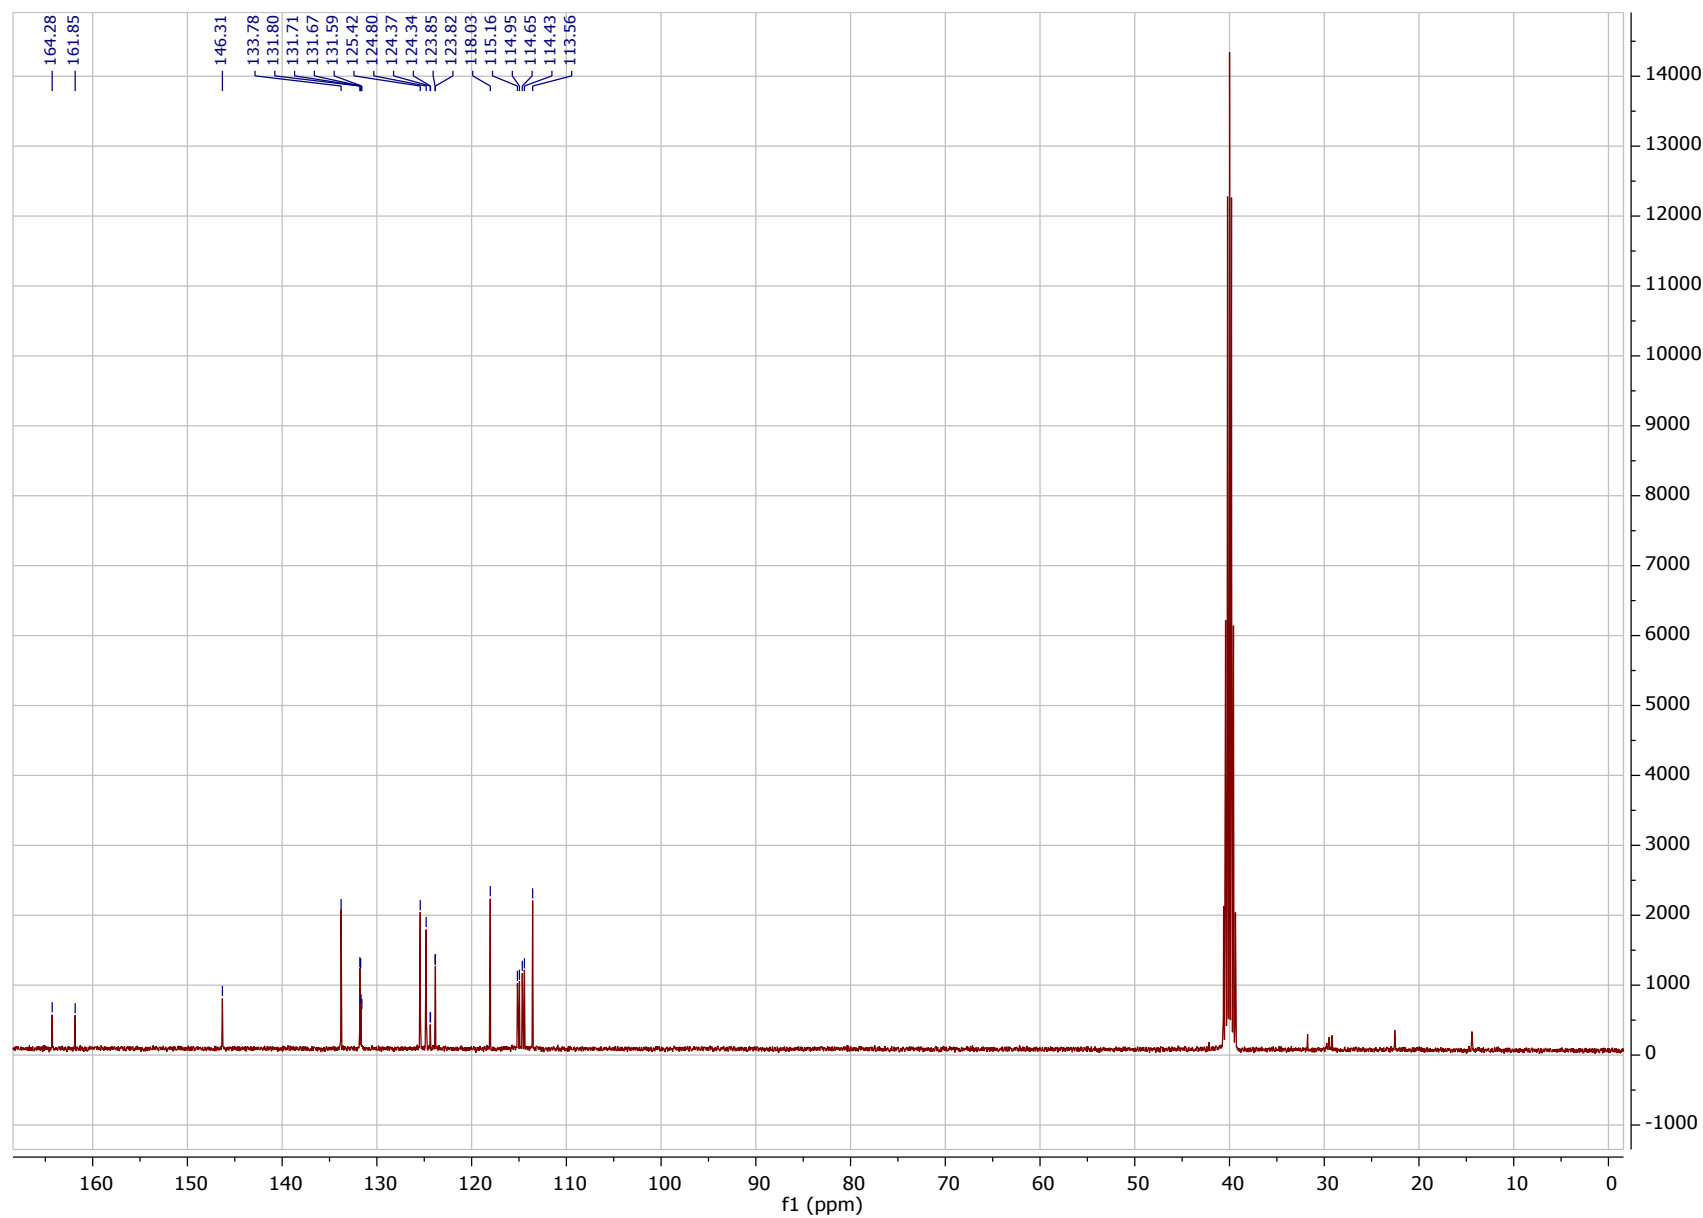

**<sup>1</sup>H NMR of 3-(4-bromophenyl)imidazo[1,2-a]pyridine (3i):**

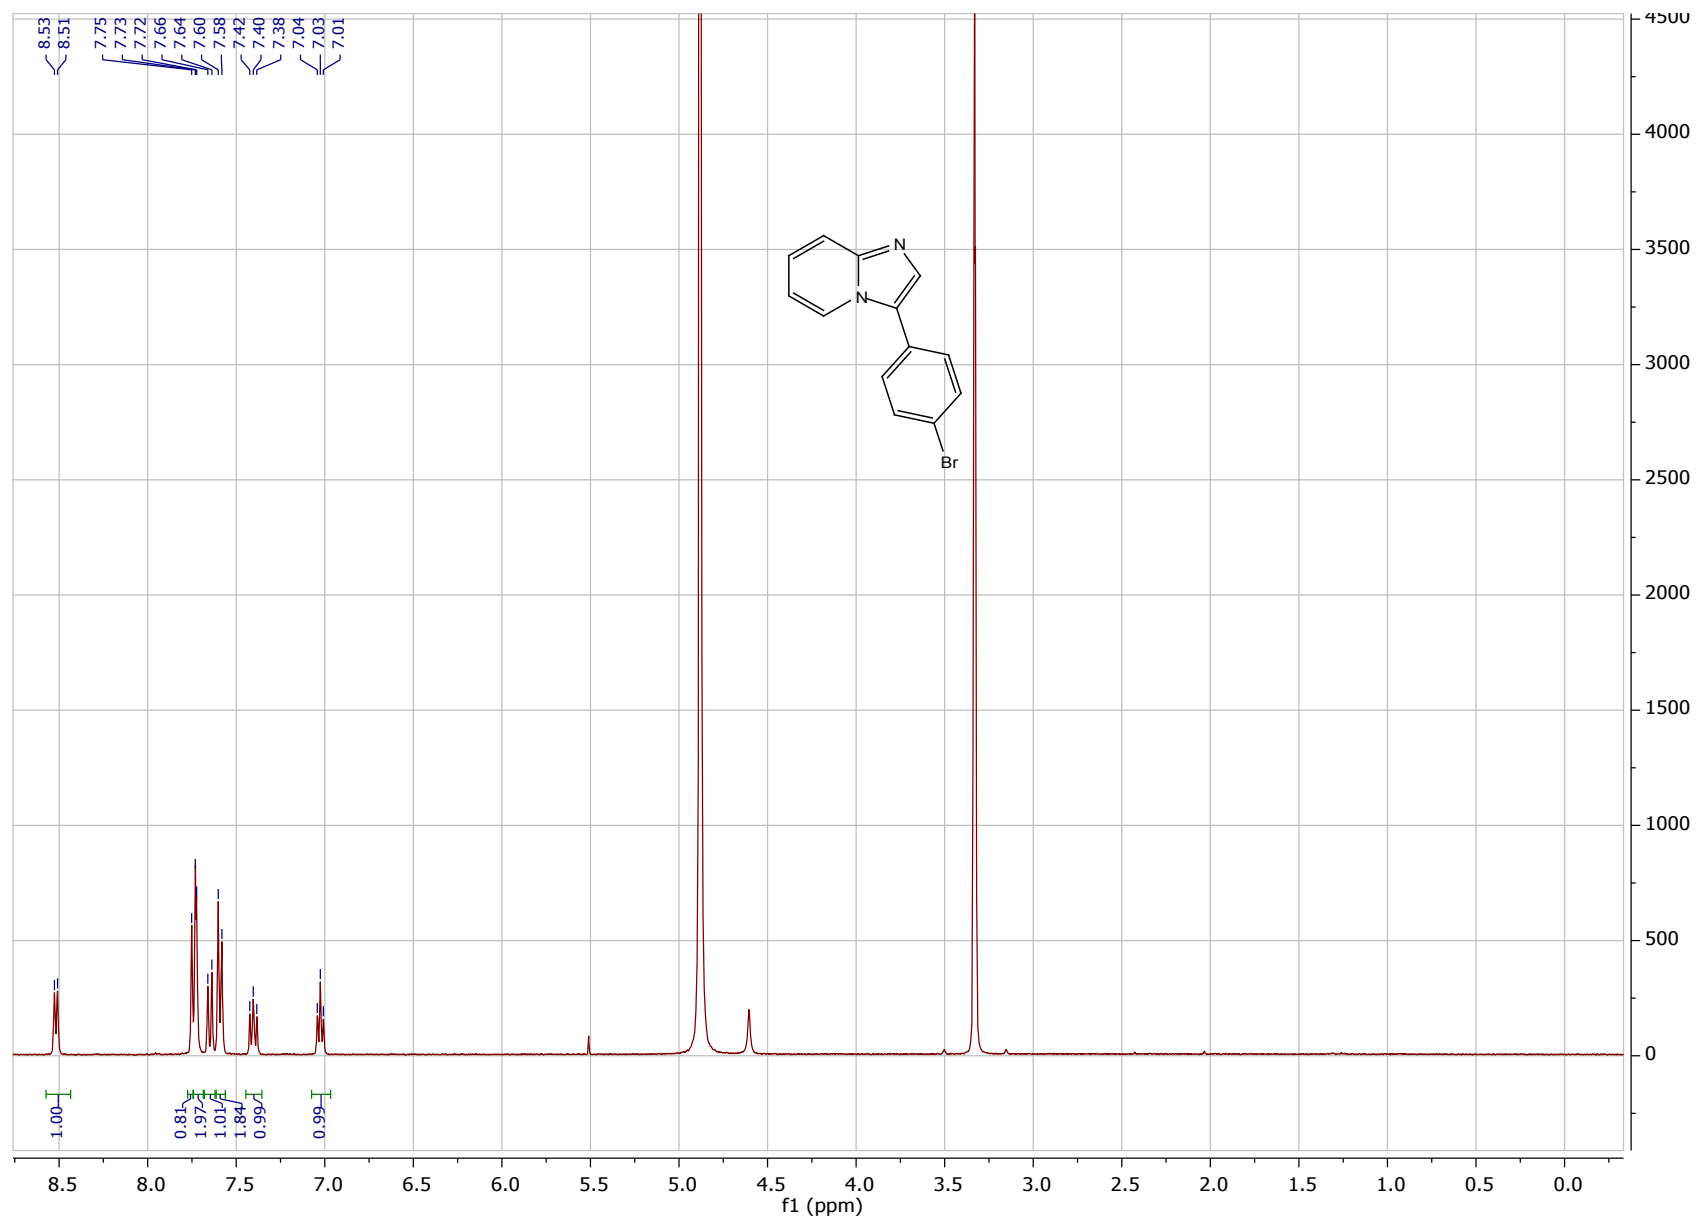

**<sup>13</sup>C NMR of 3-(4-bromophenyl)imidazo[1,2-a]pyridine (3i):**

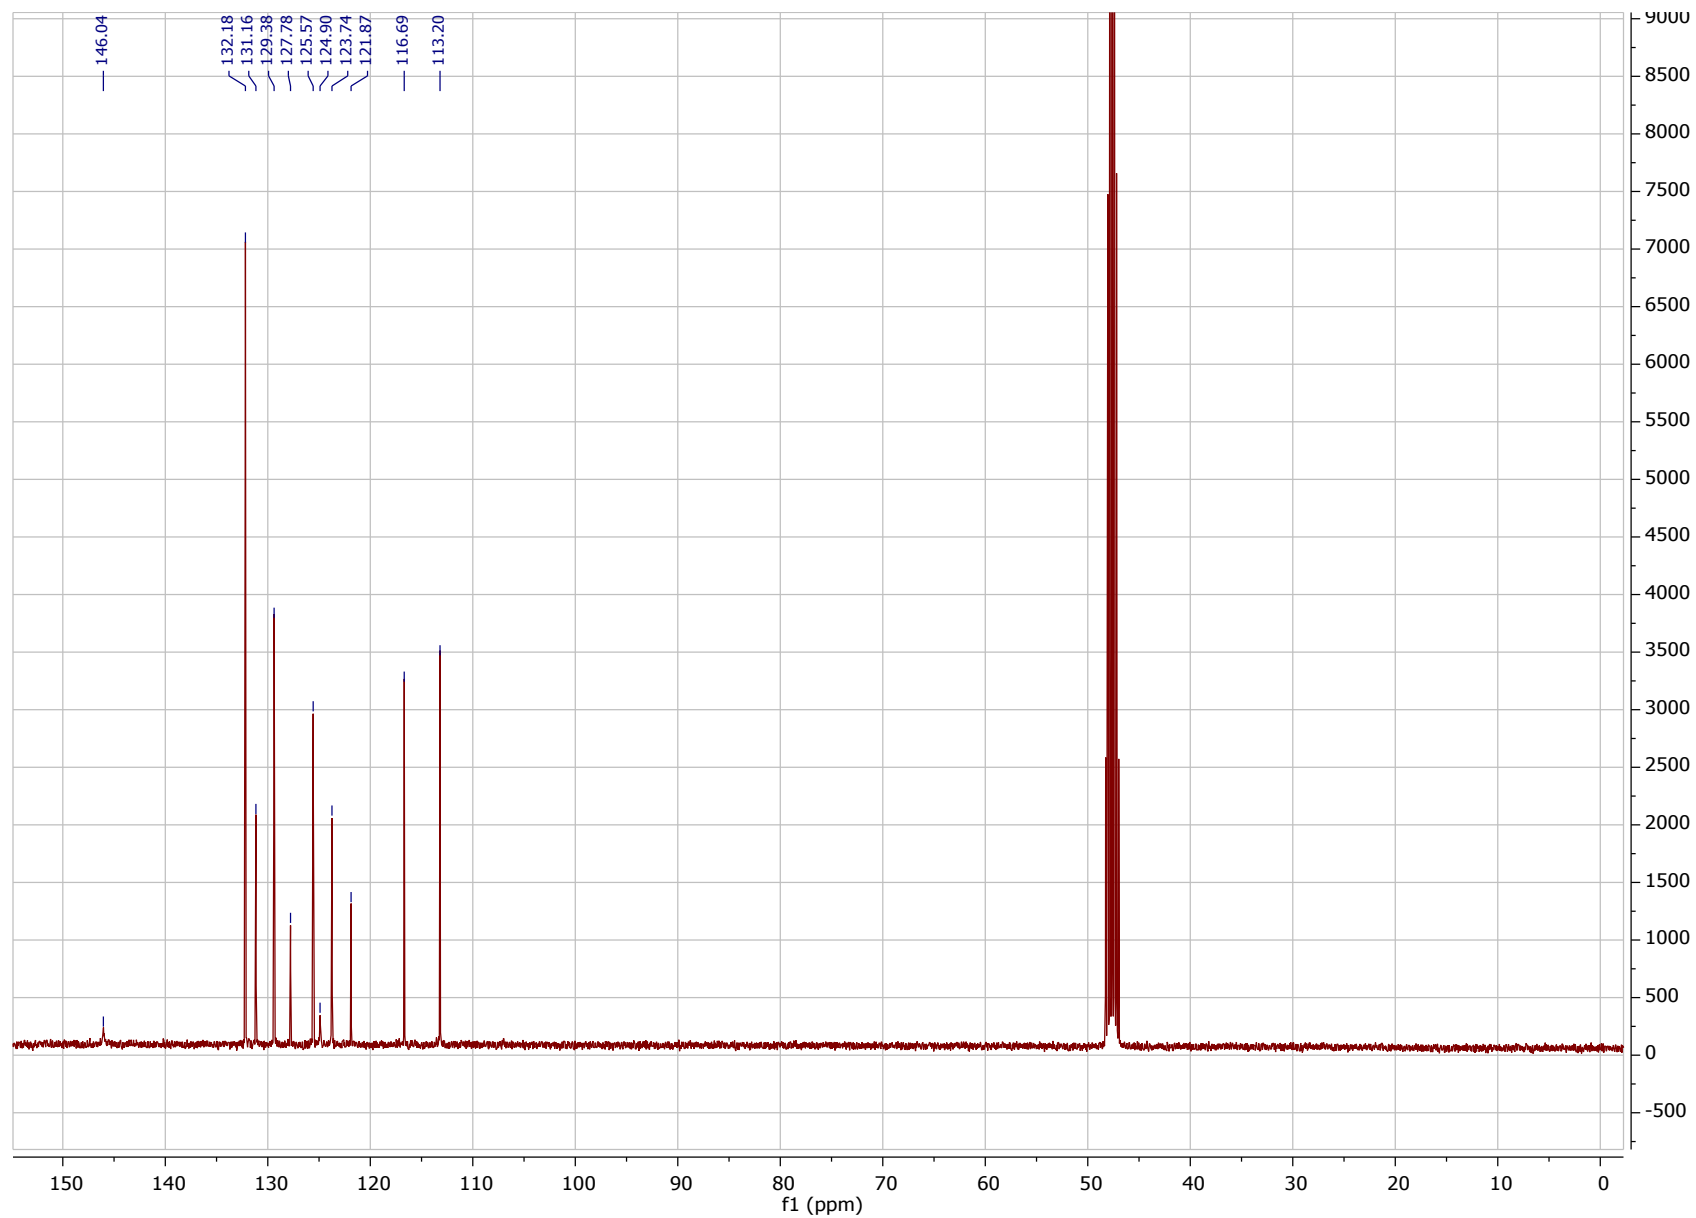

**<sup>1</sup>H NMR of 3-(4-fluorophenyl)imidazo[1,2-a]pyridine (3j):**

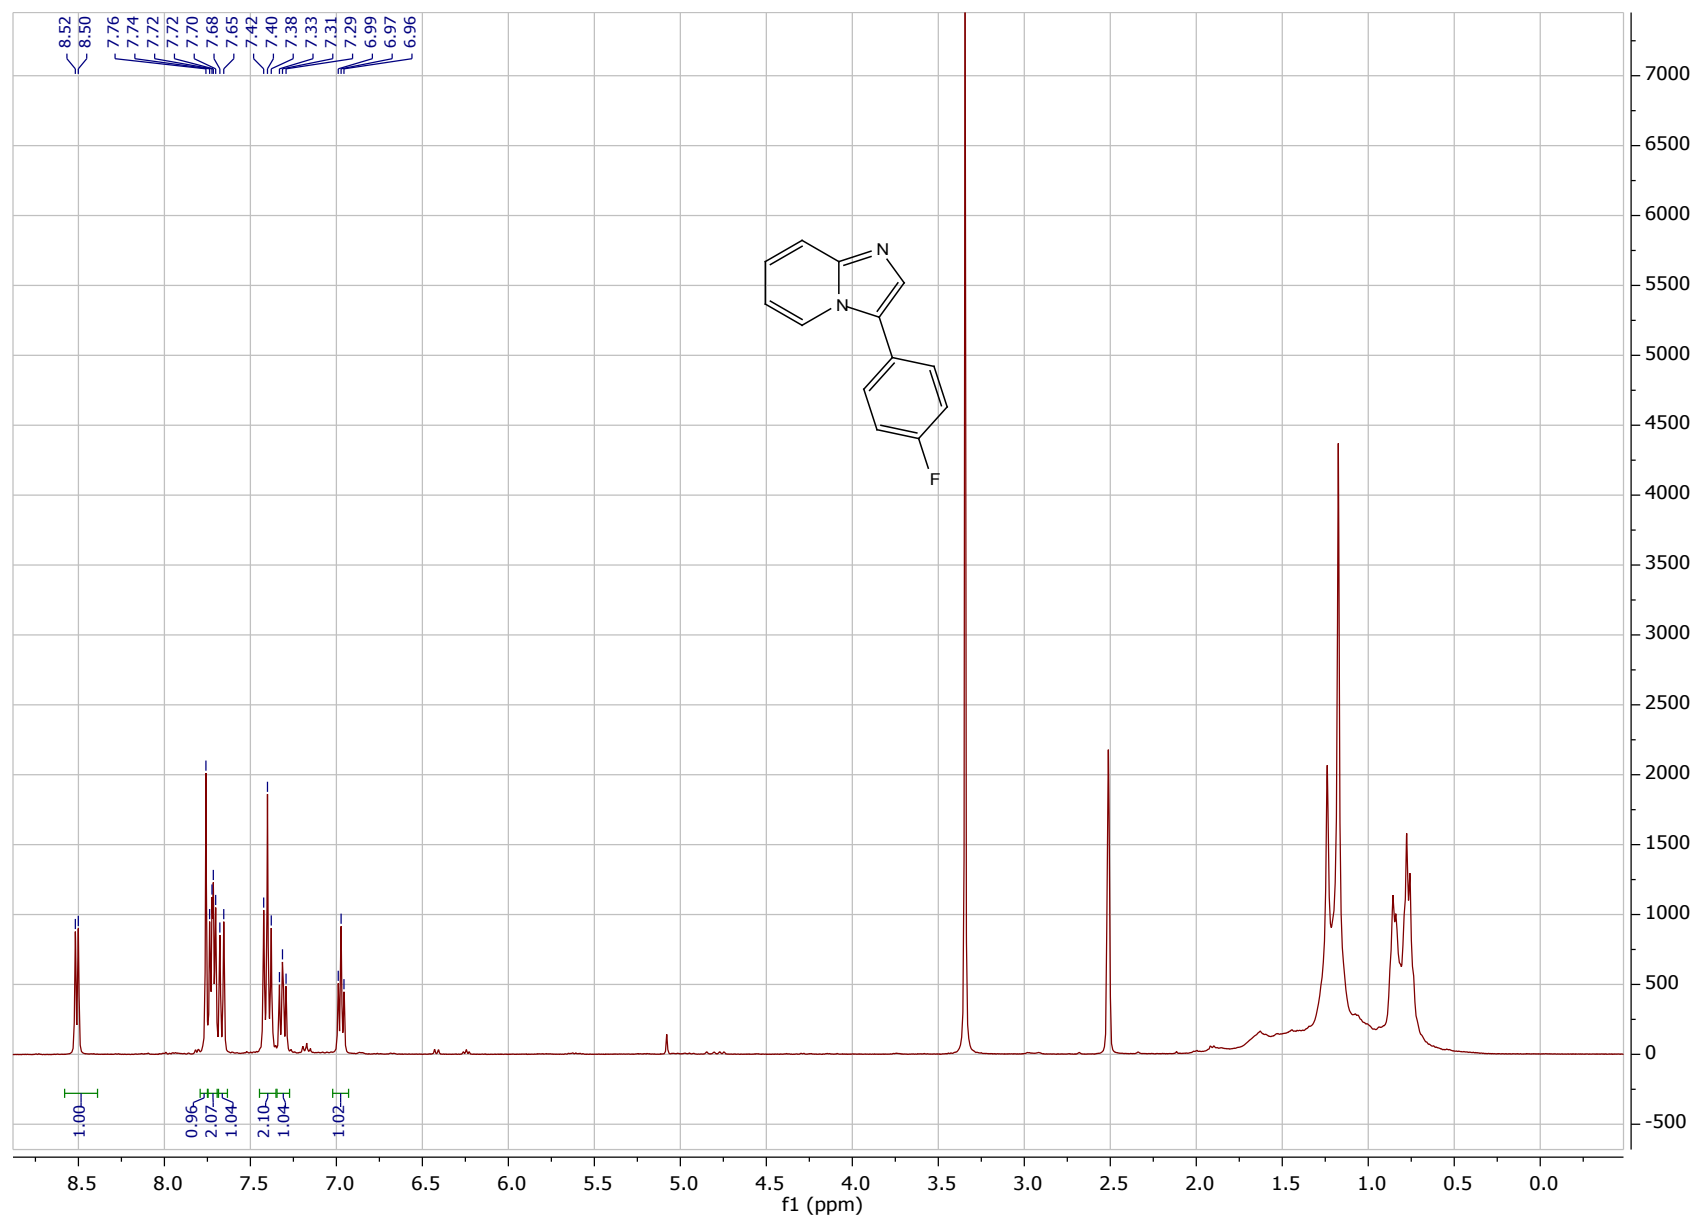

**<sup>13</sup>C NMR of 3-(4-fluorophenyl)imidazo[1,2-a]pyridine (3j):**

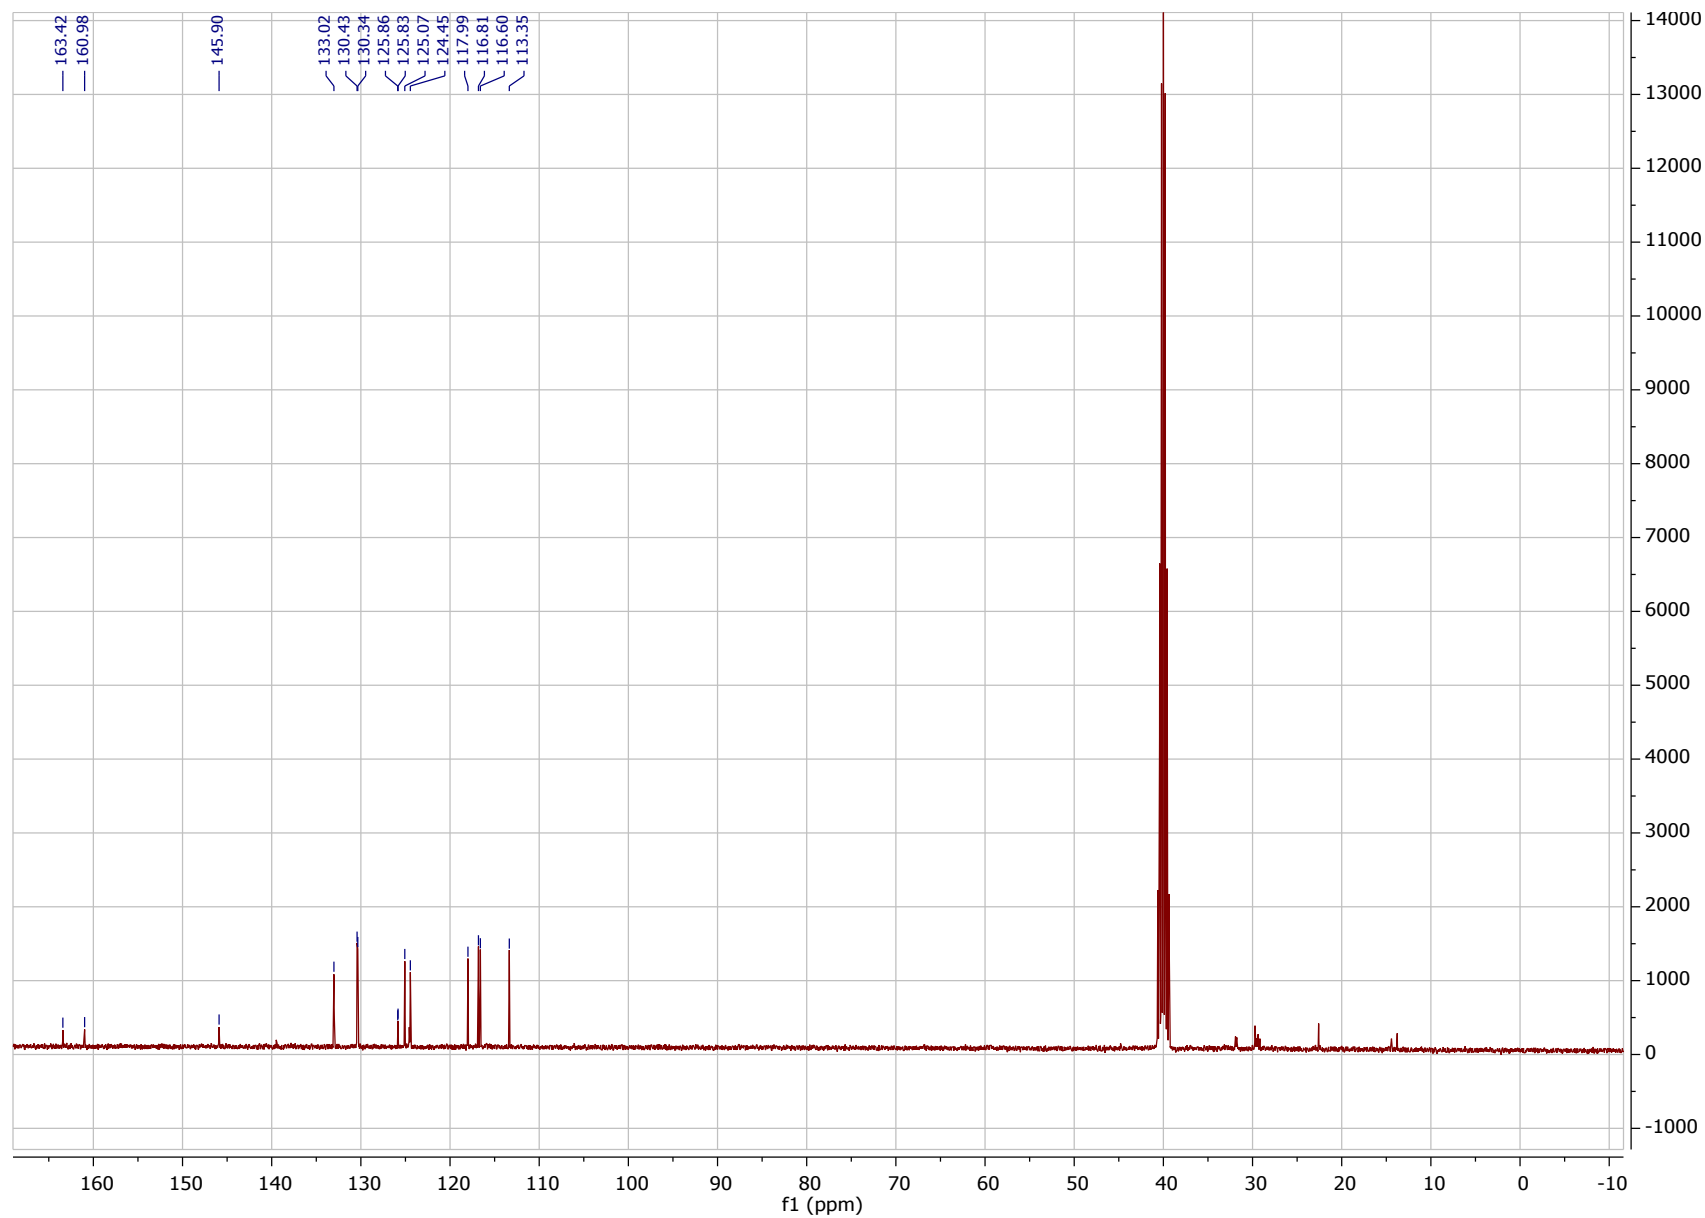

**<sup>1</sup>H NMR of 3-(3-chloro-4-fluorophenyl)imidazo[1,2-a]pyridine (3k):**

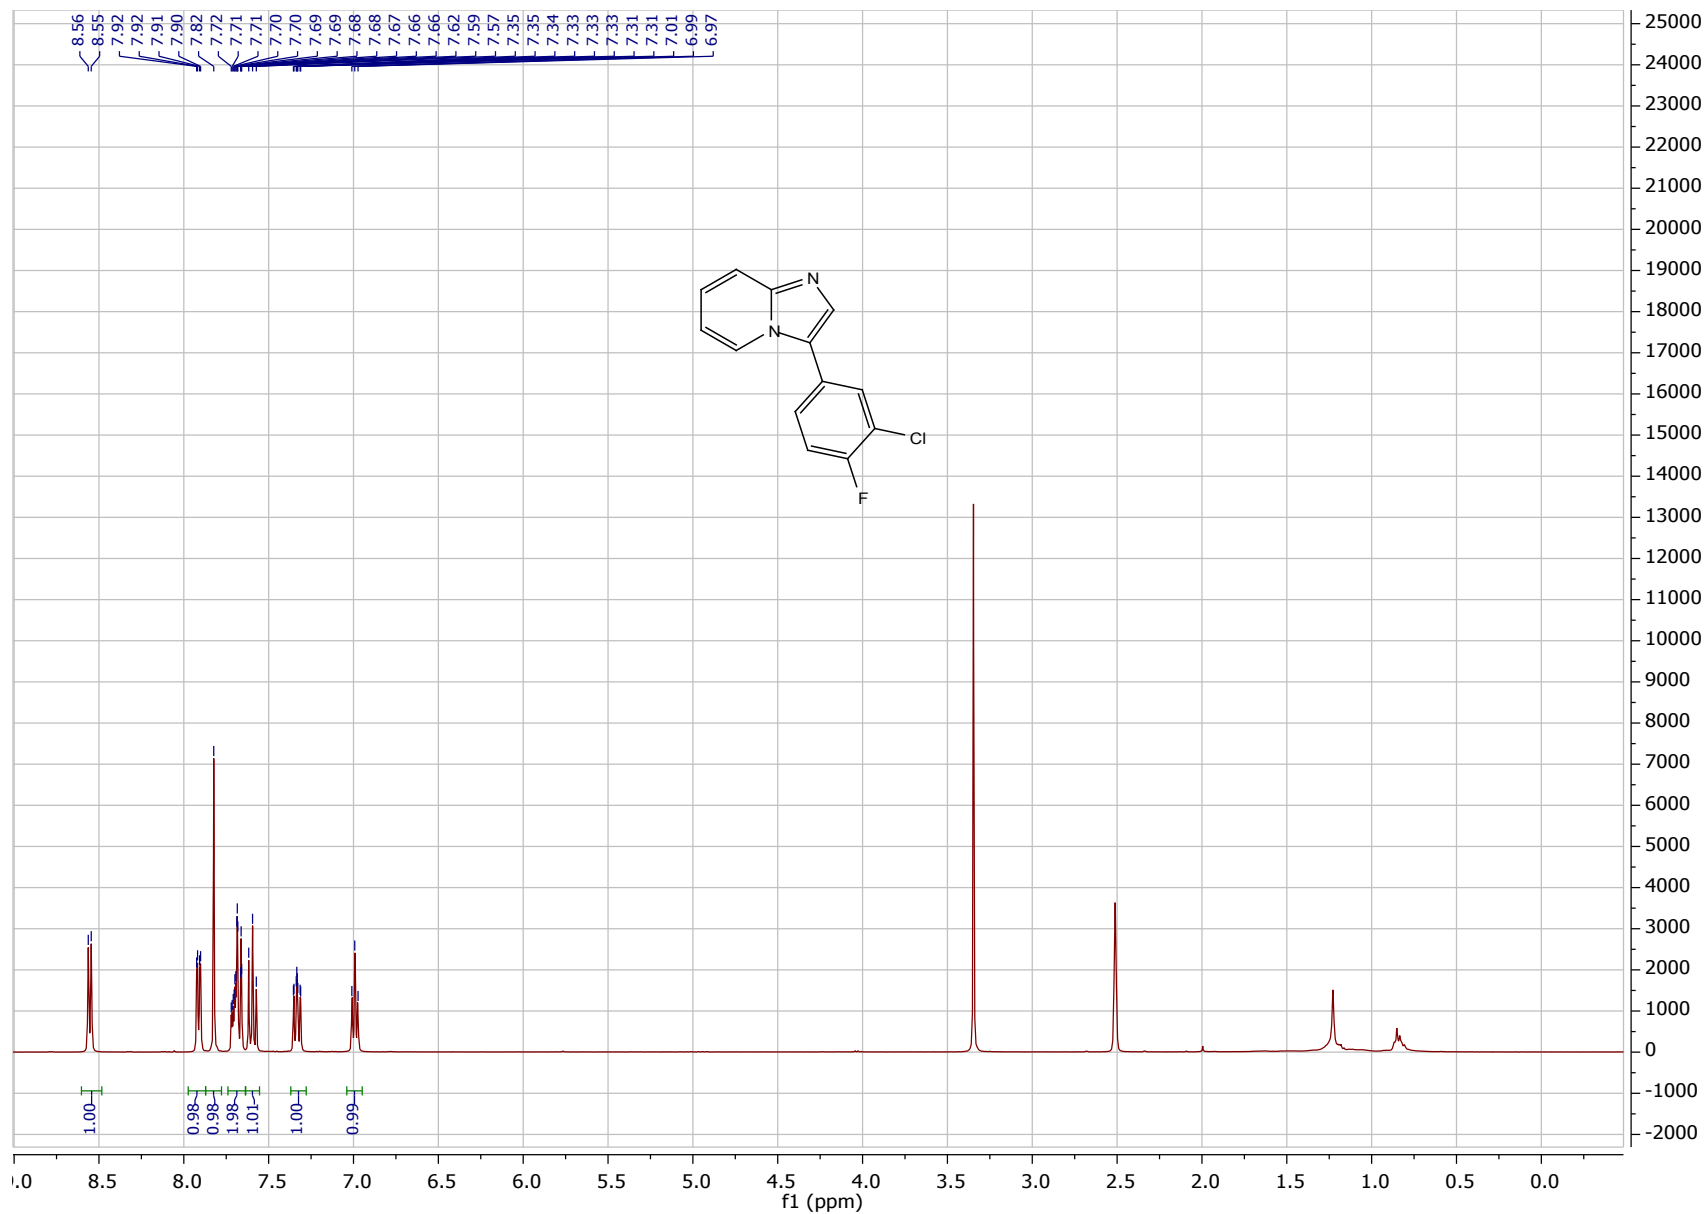

**<sup>13</sup>C NMR of 3-(3-chloro-4-fluorophenyl)imidazo[1,2-a]pyridine (3k):**

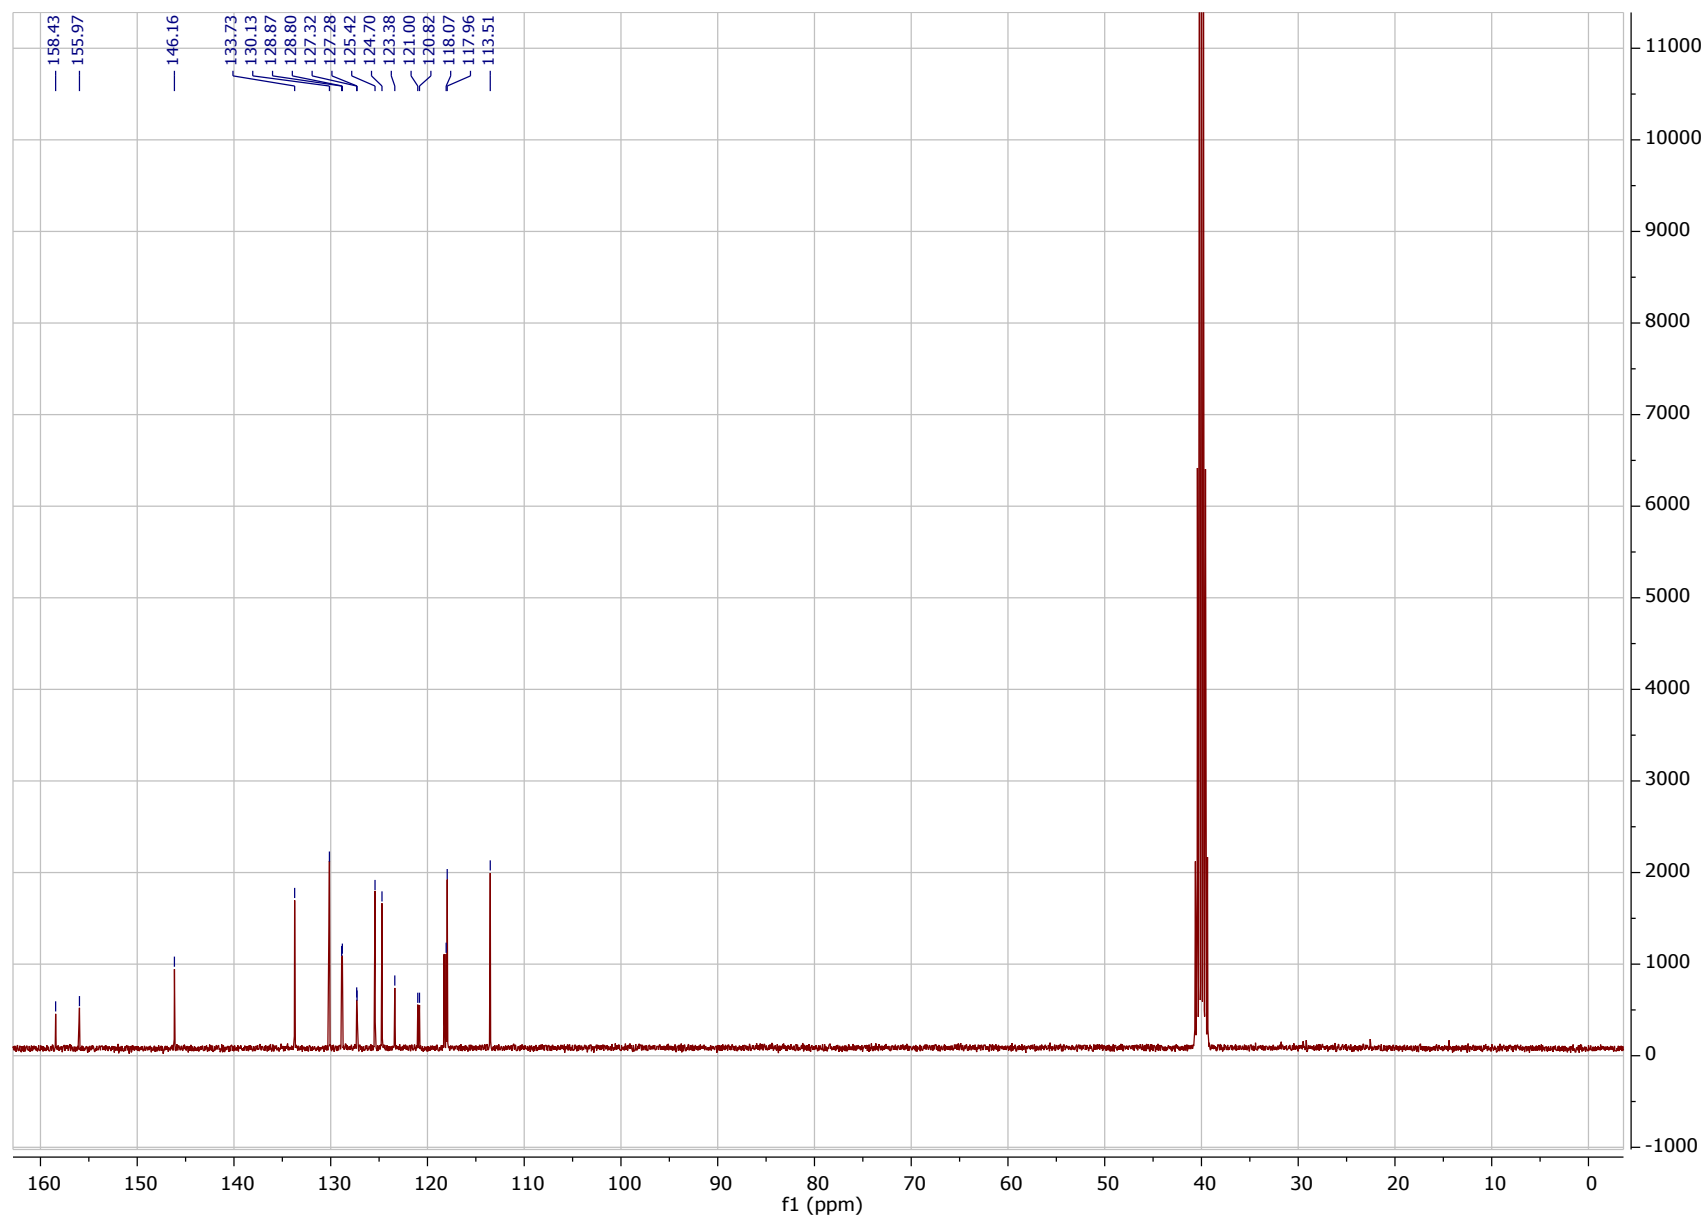

**<sup>1</sup>H NMR of 3-(4-(trifluoromethyl)phenyl)imidazo[1,2-a]pyridine (3l):**

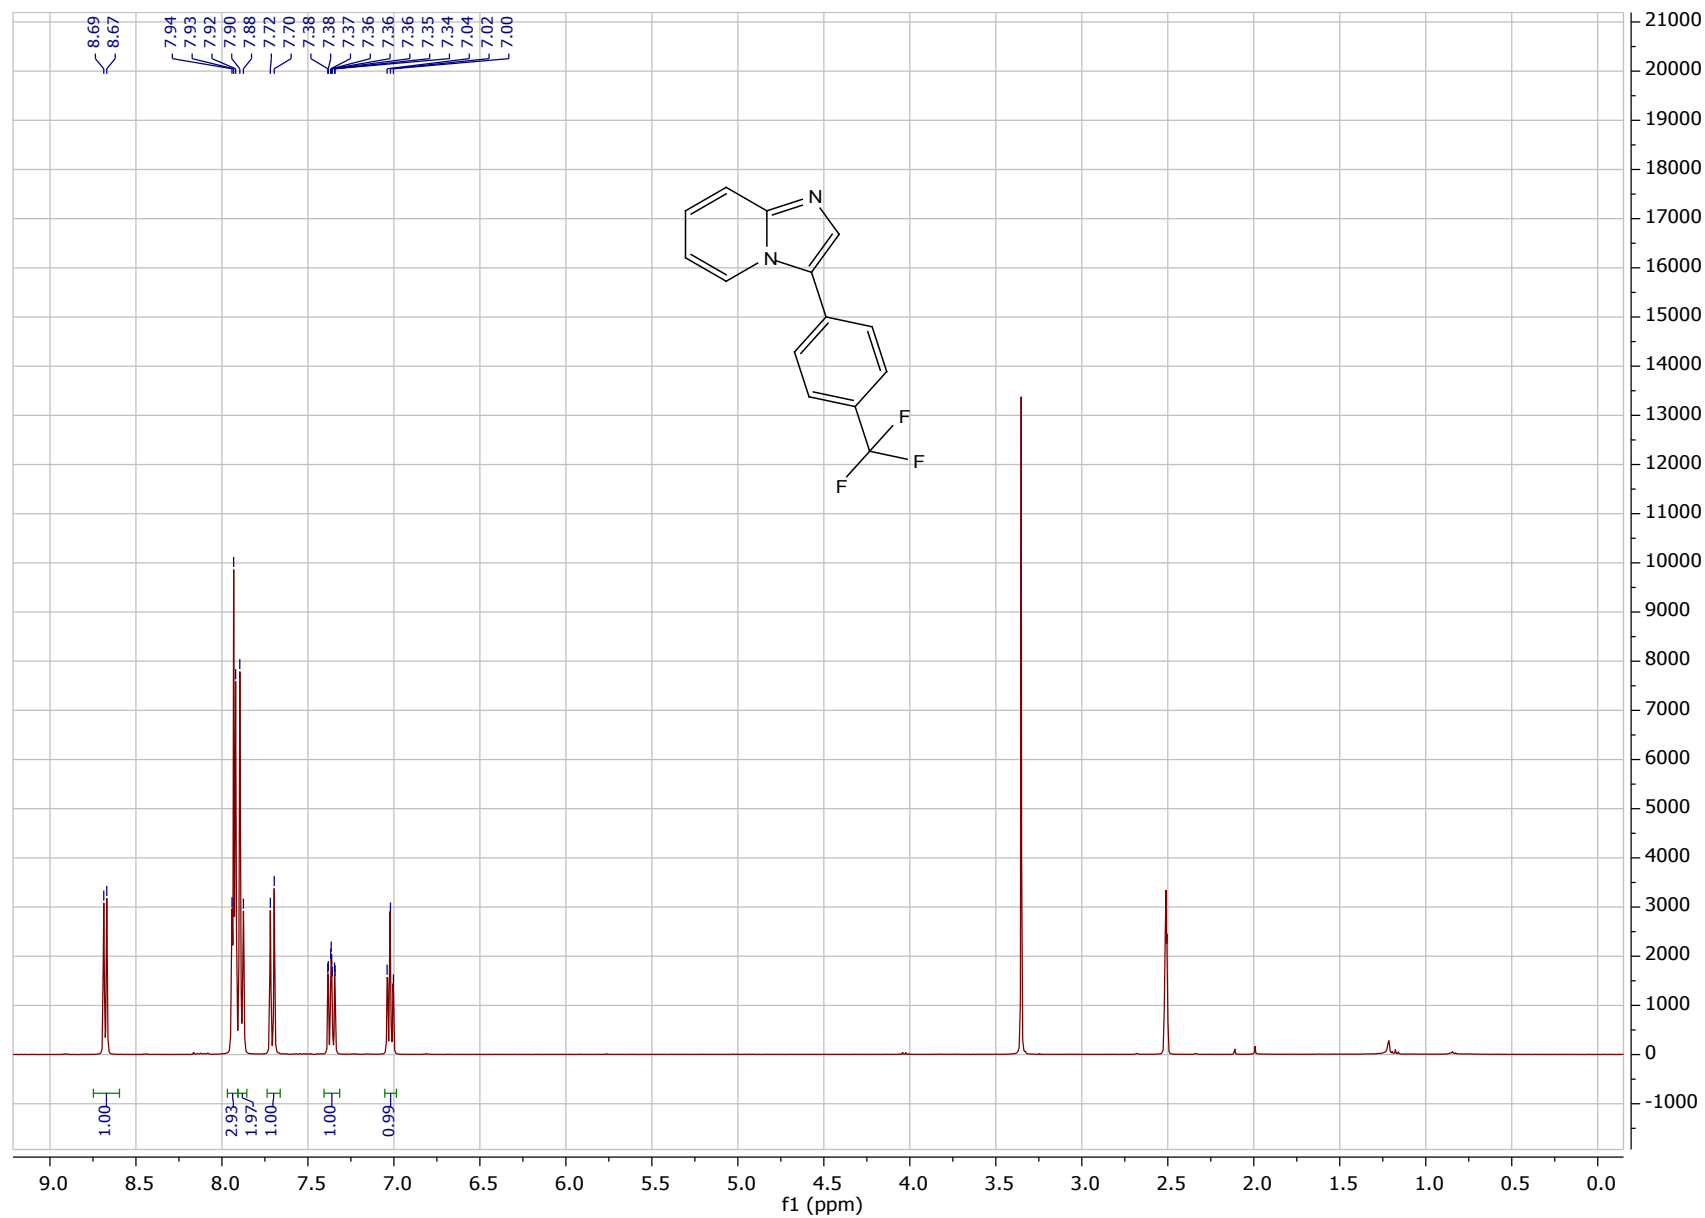



**<sup>13</sup>C NMR of 3-(4-(trifluoromethyl)phenyl)imidazo[1,2-a]pyridine (3l):**

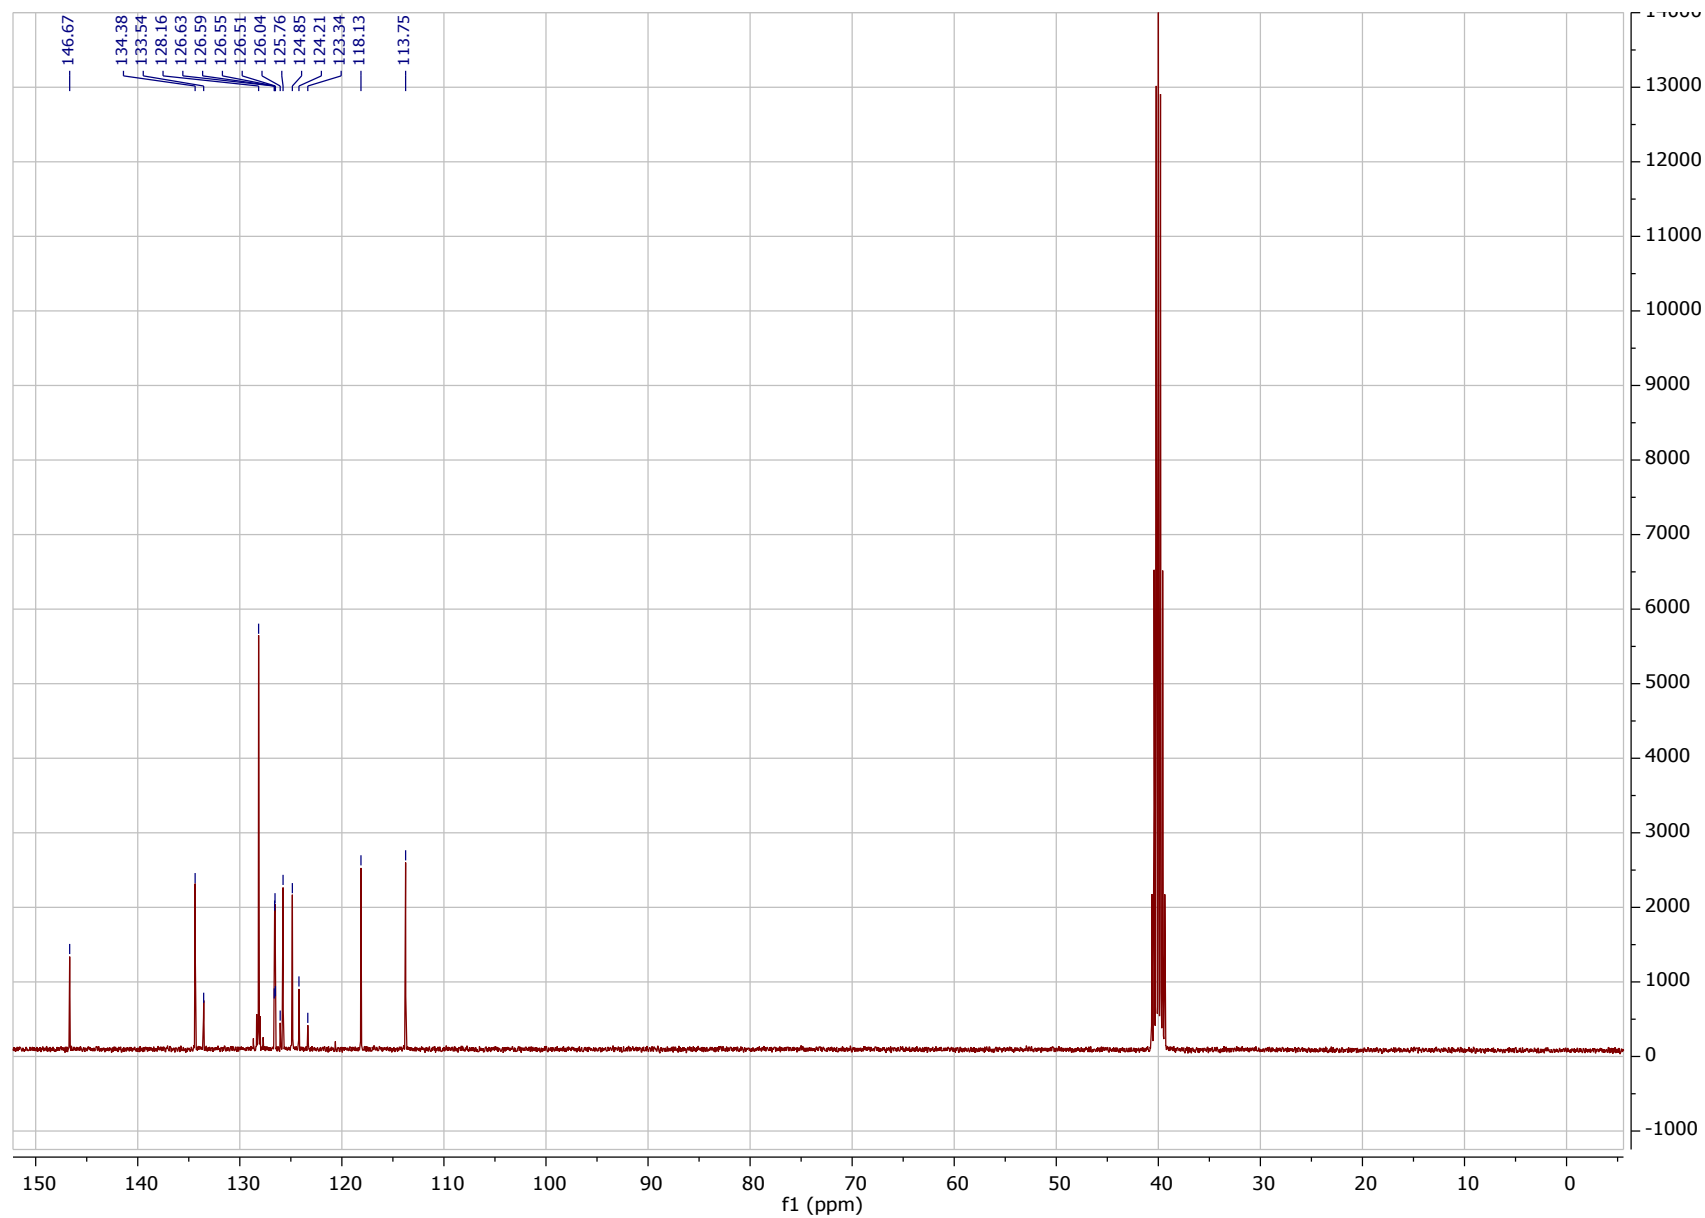

**<sup>1</sup>H NMR of 3-(3,5-bis(trifluoromethyl)phenyl)imidazo[1,2-a]pyridine (3m):**

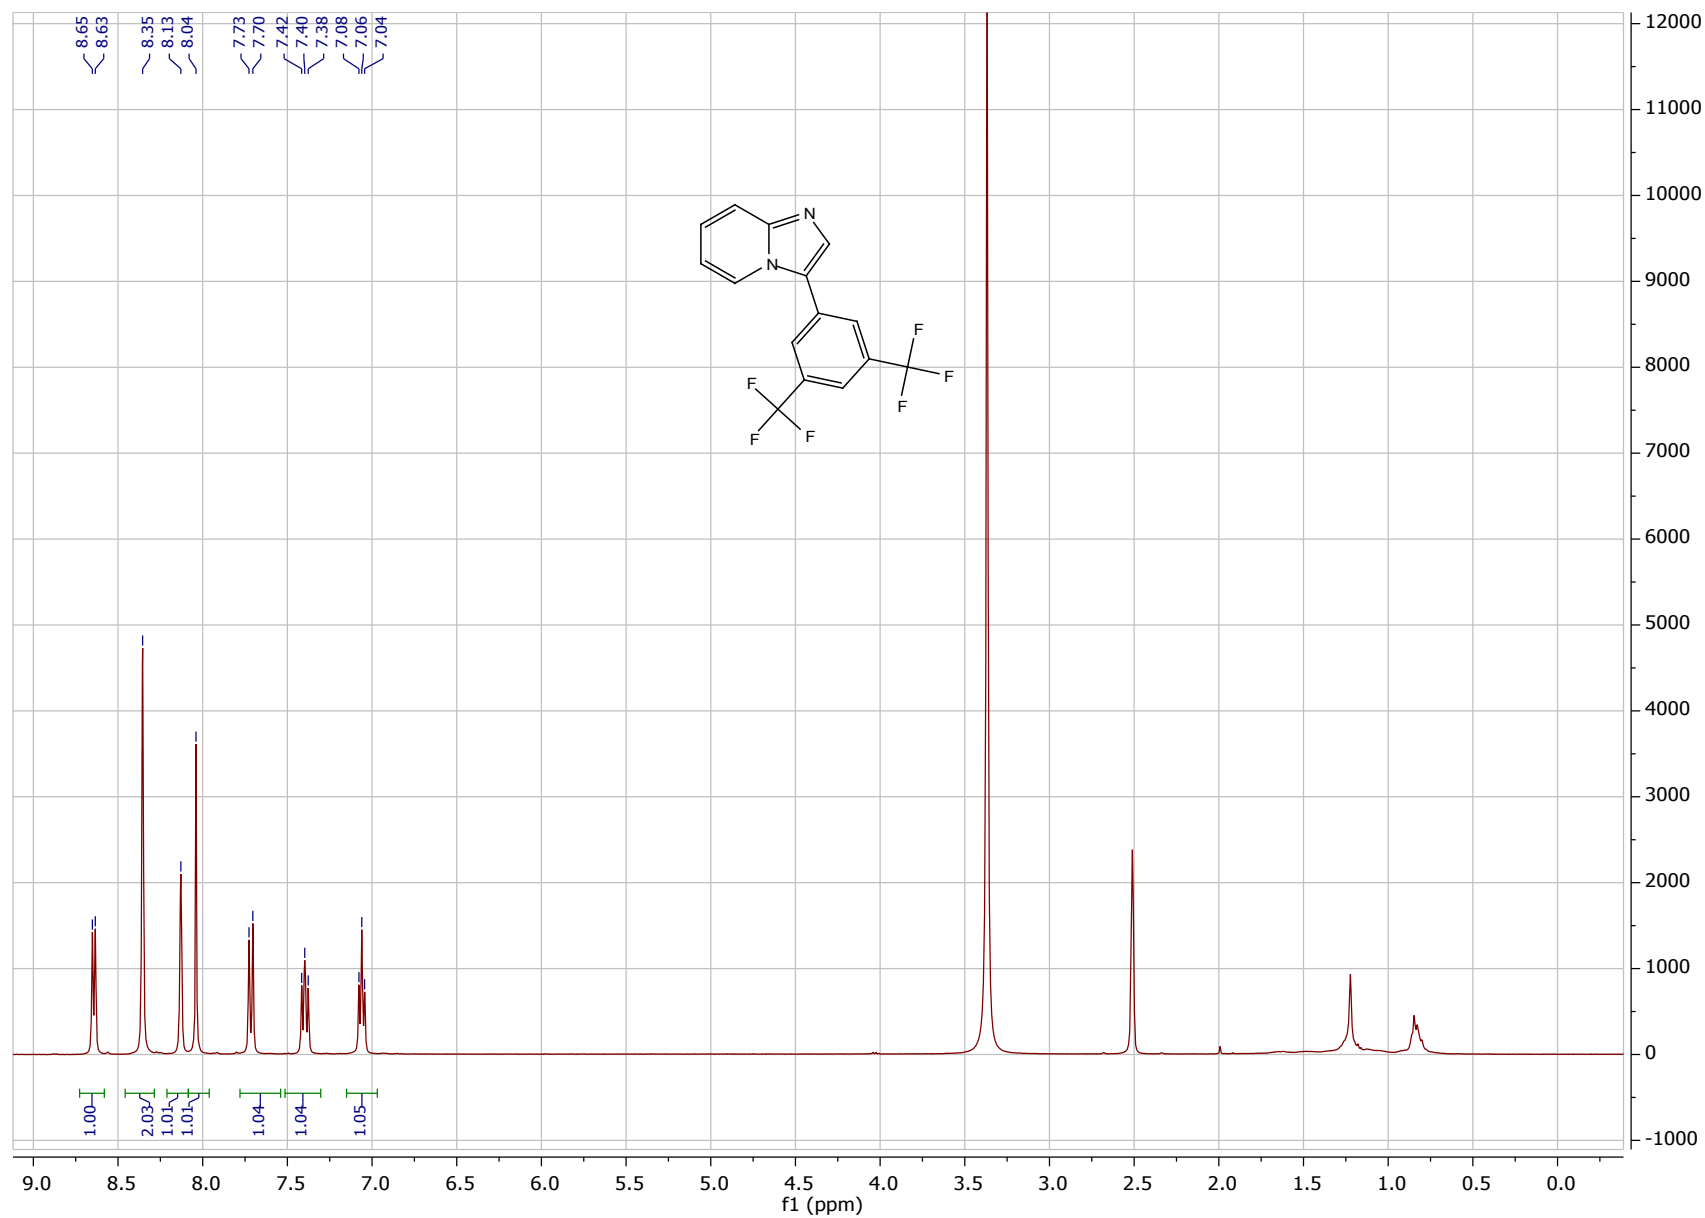

**<sup>13</sup>C NMR of 3-(3,5-bis(trifluoromethyl)phenyl)imidazo[1,2-a]pyridine (3m):**

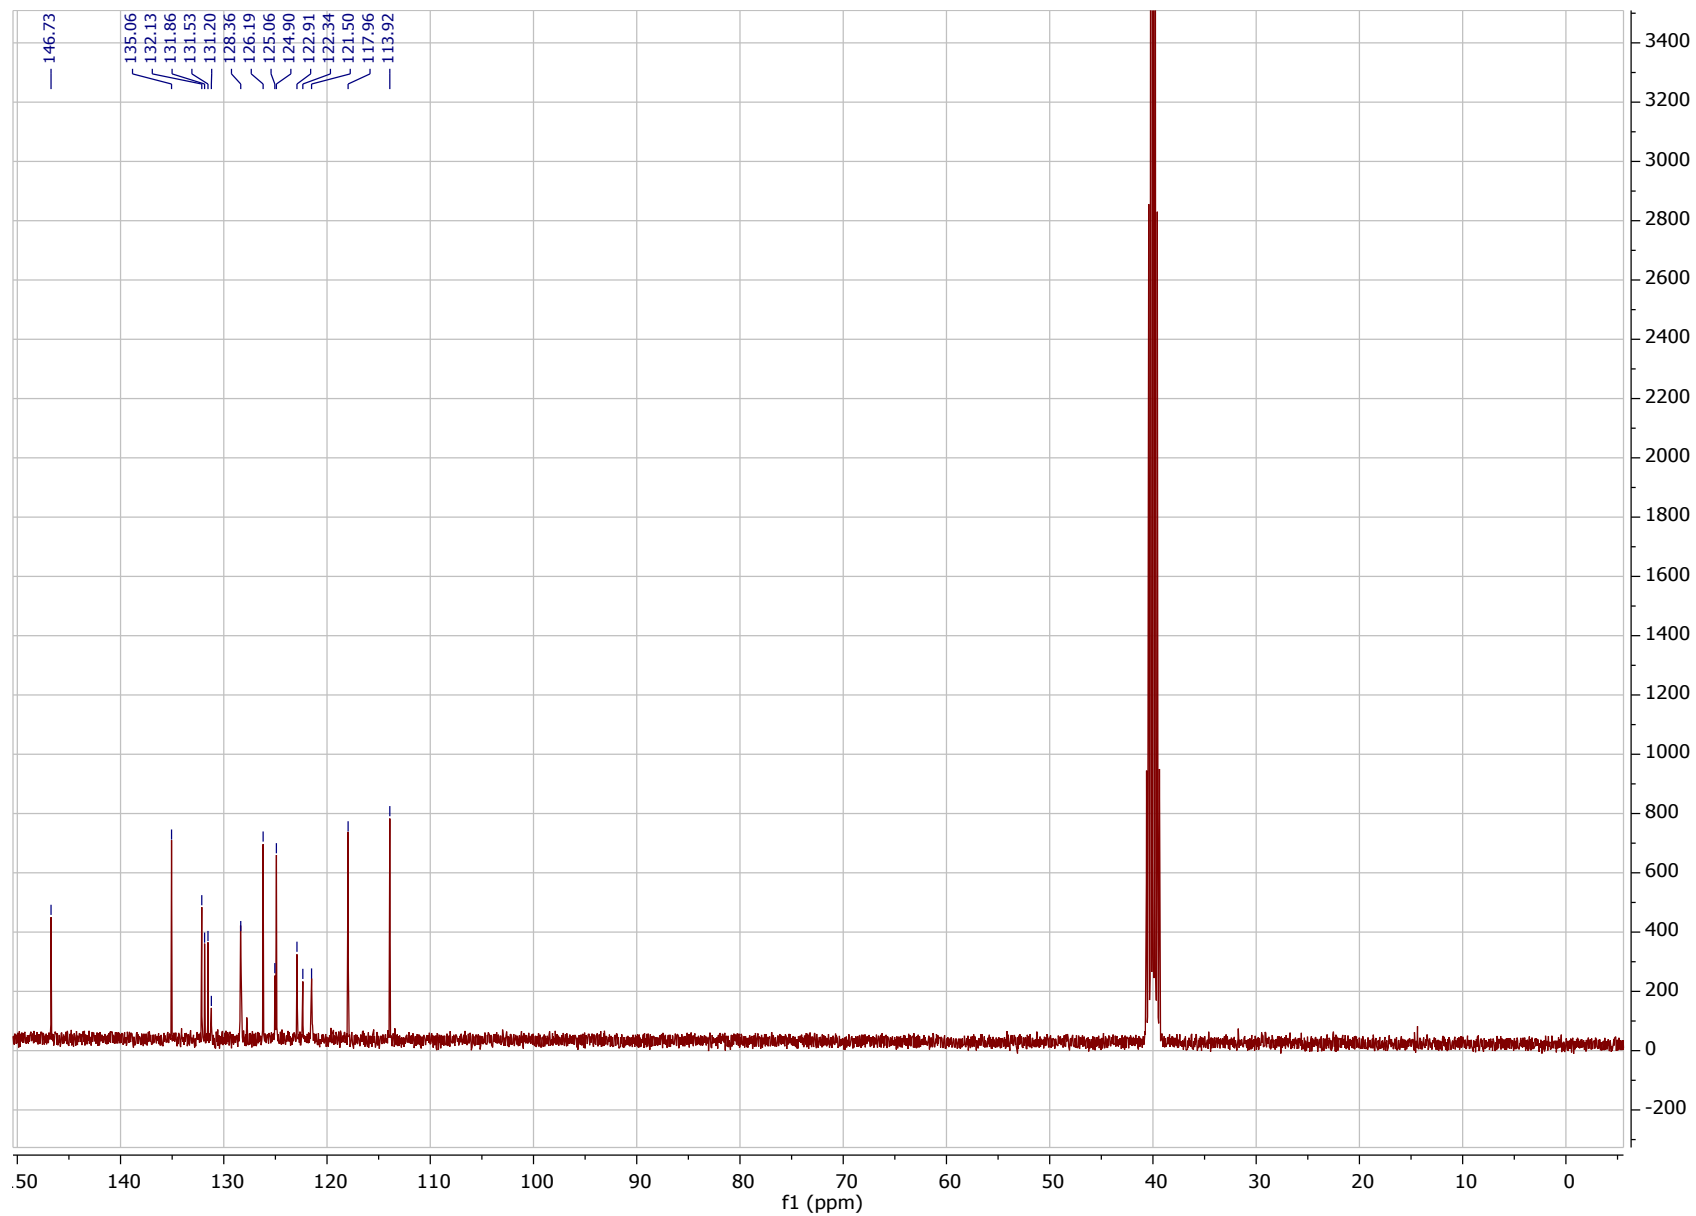

**<sup>1</sup>H NMR of 3-(3,5-difluorophenyl)imidazo[1,2-a]pyridine (3n):**

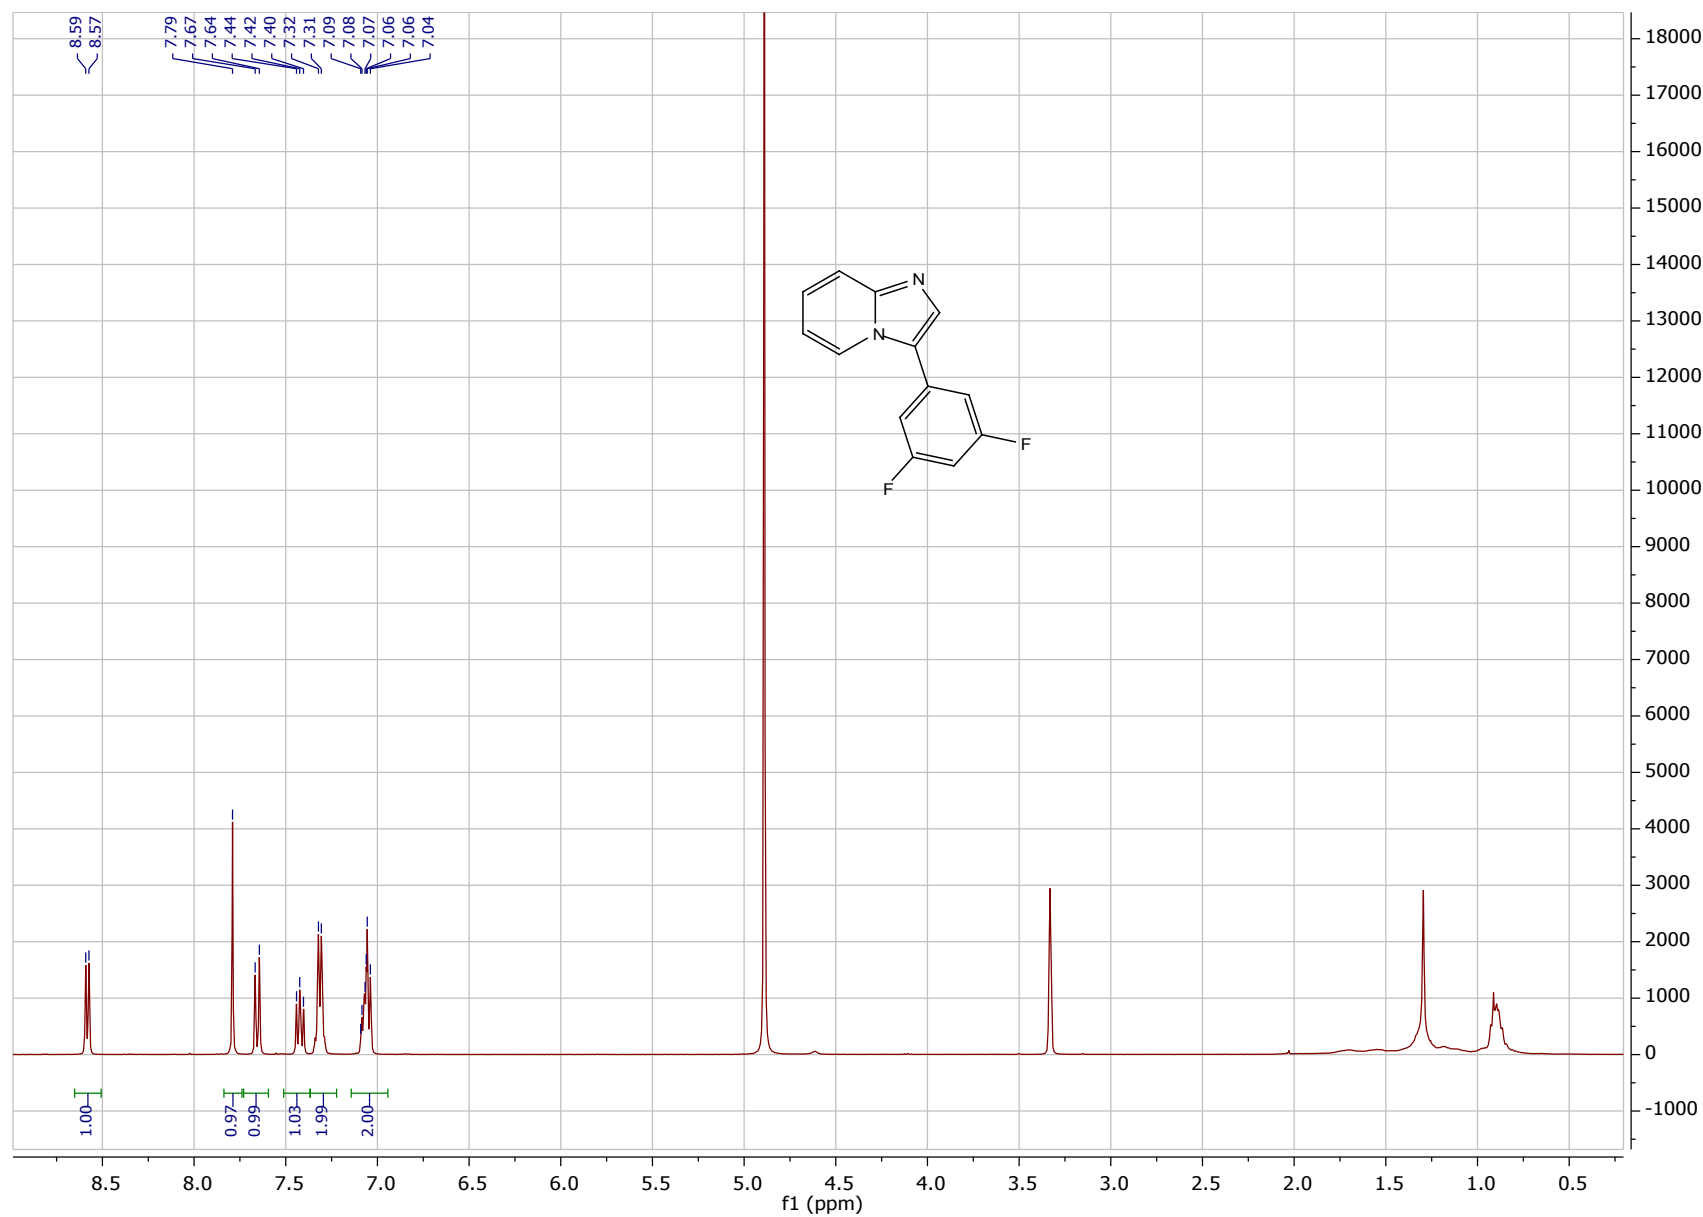

**<sup>13</sup>C NMR of 3-(3,5-difluorophenyl)imidazo[1,2-a]pyridine (3n):**

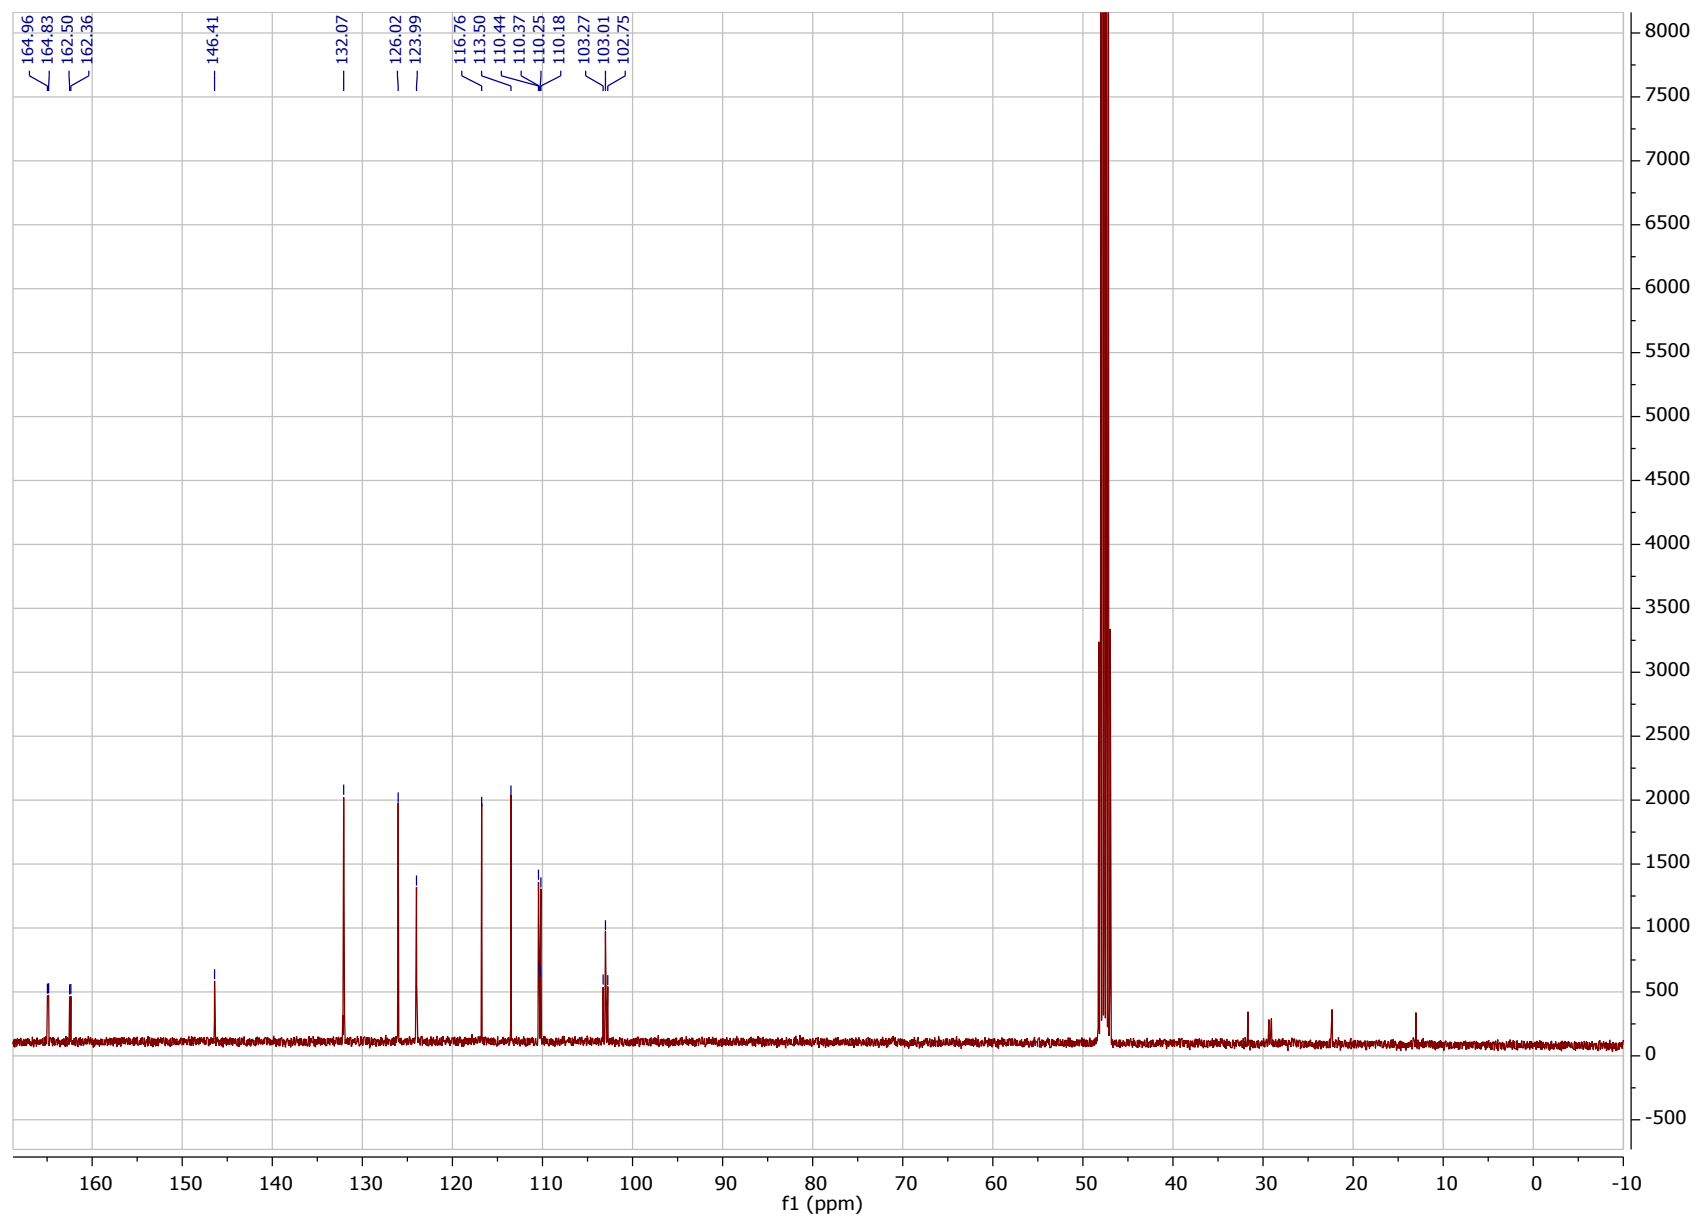

**<sup>1</sup>H NMR of 3-(2-chloro-6-fluorophenyl)imidazo[1,2-a]pyridine (3o):**

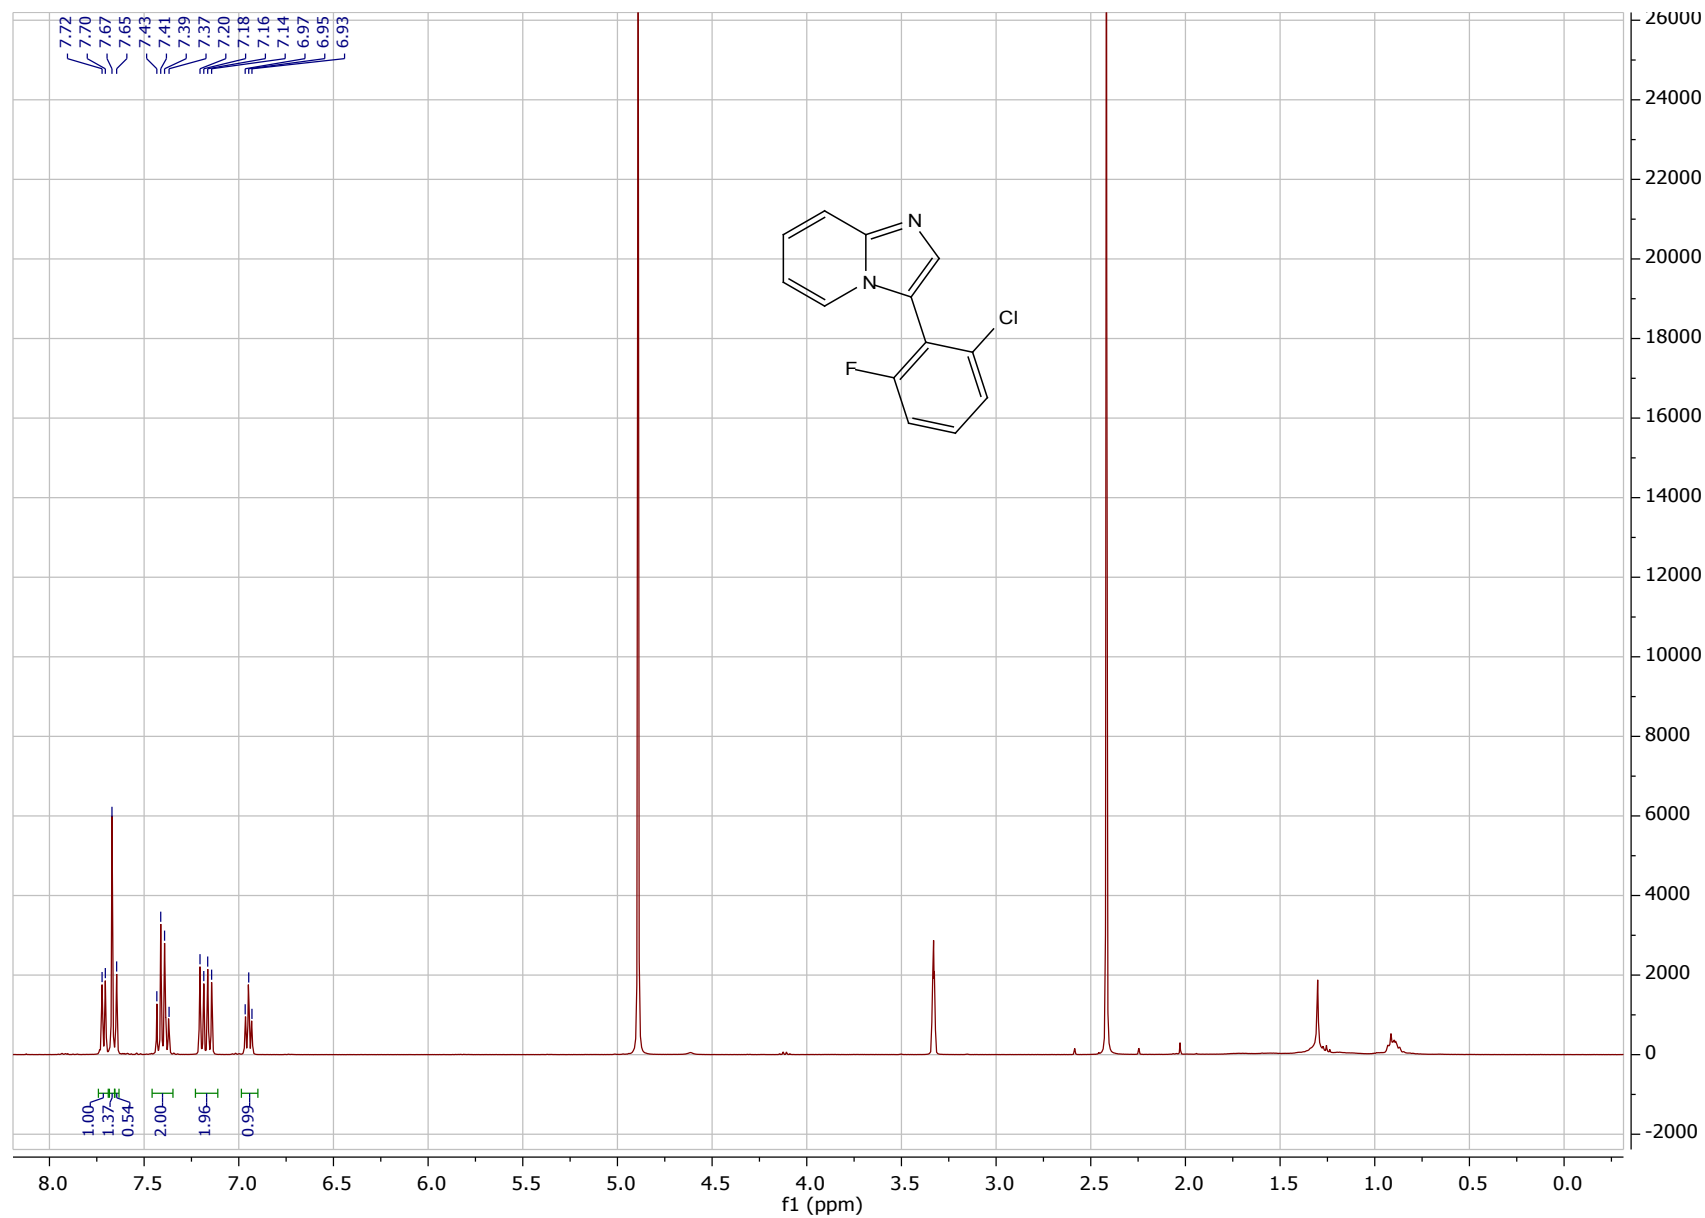

**<sup>13</sup>C NMR of 3-(2-chloro-6-fluorophenyl)imidazo[1,2-a]pyridine (3o):**

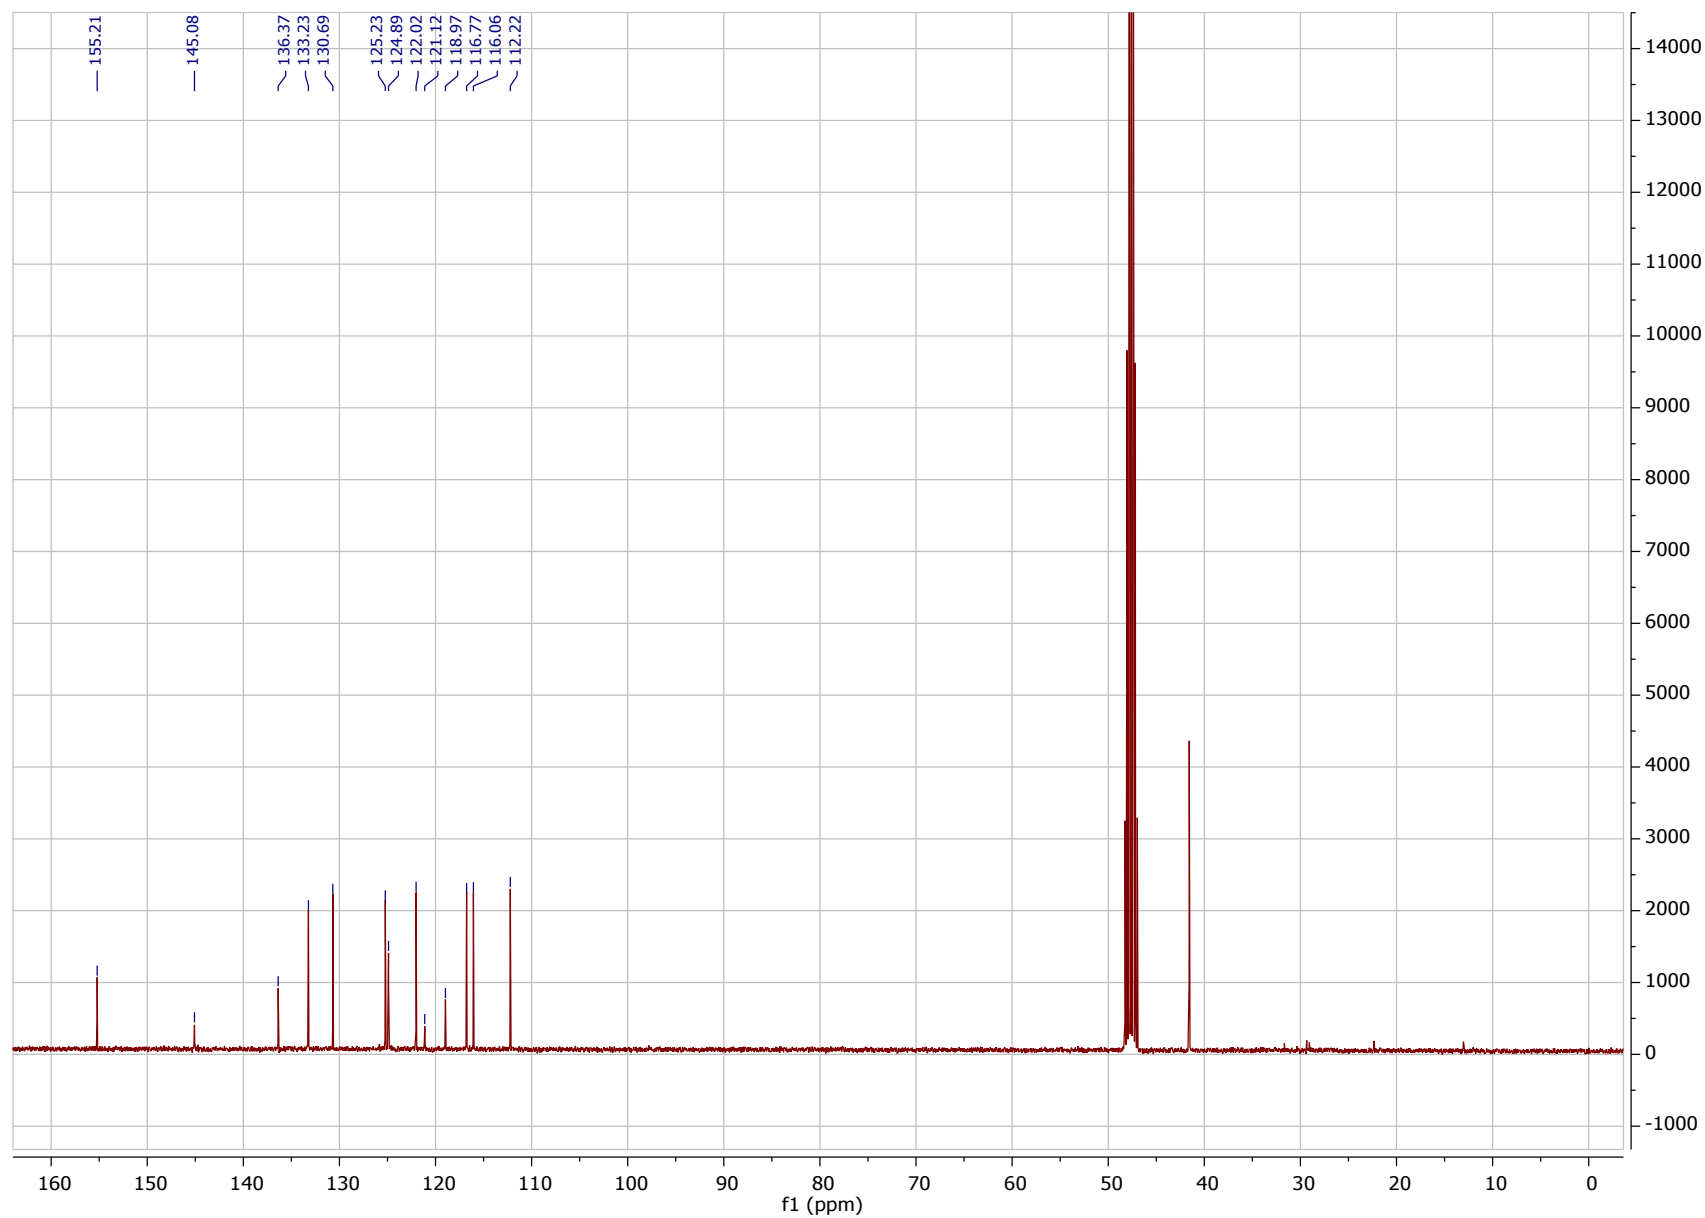

**<sup>1</sup>H NMR of 6-chloro-3-phenylimidazo[1,2-a]pyridine (6a):**

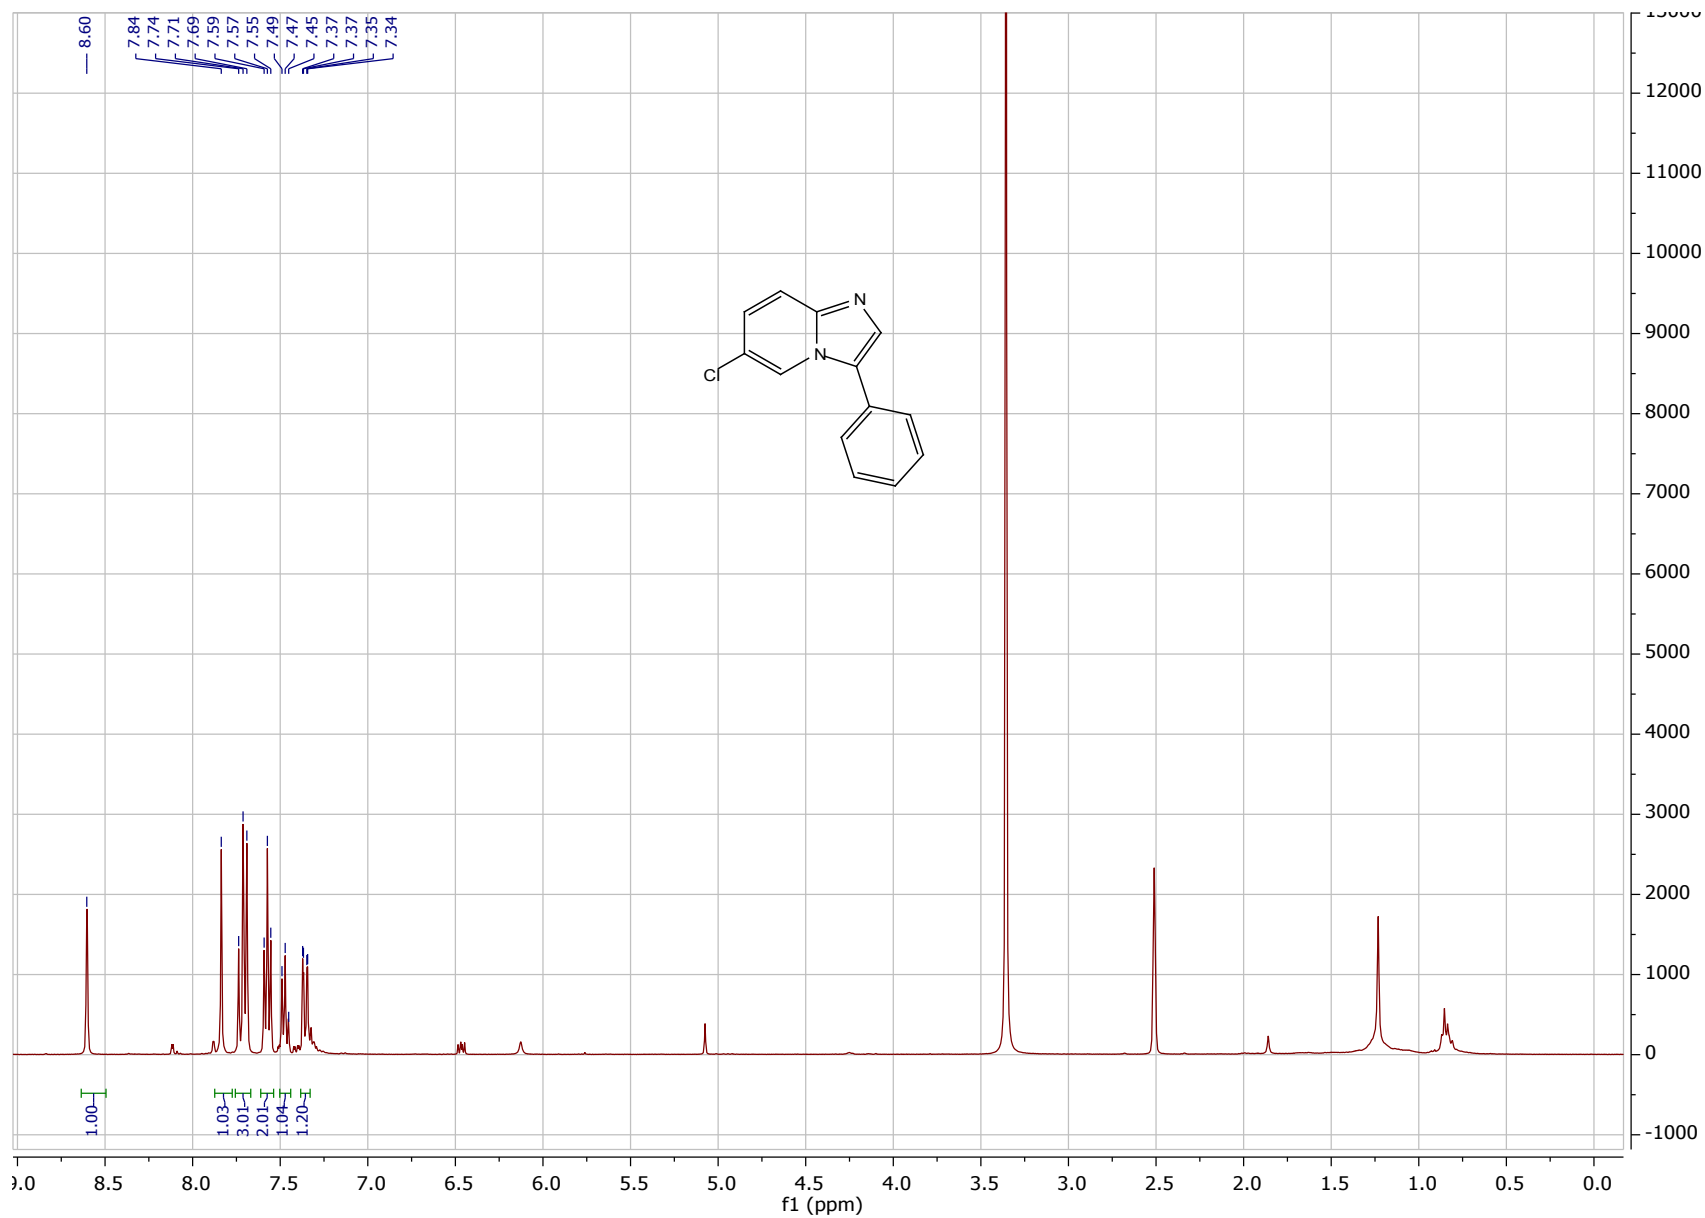



**<sup>13</sup>C NMR of 6-chloro-3-phenylimidazo[1,2-a]pyridine (6a):**

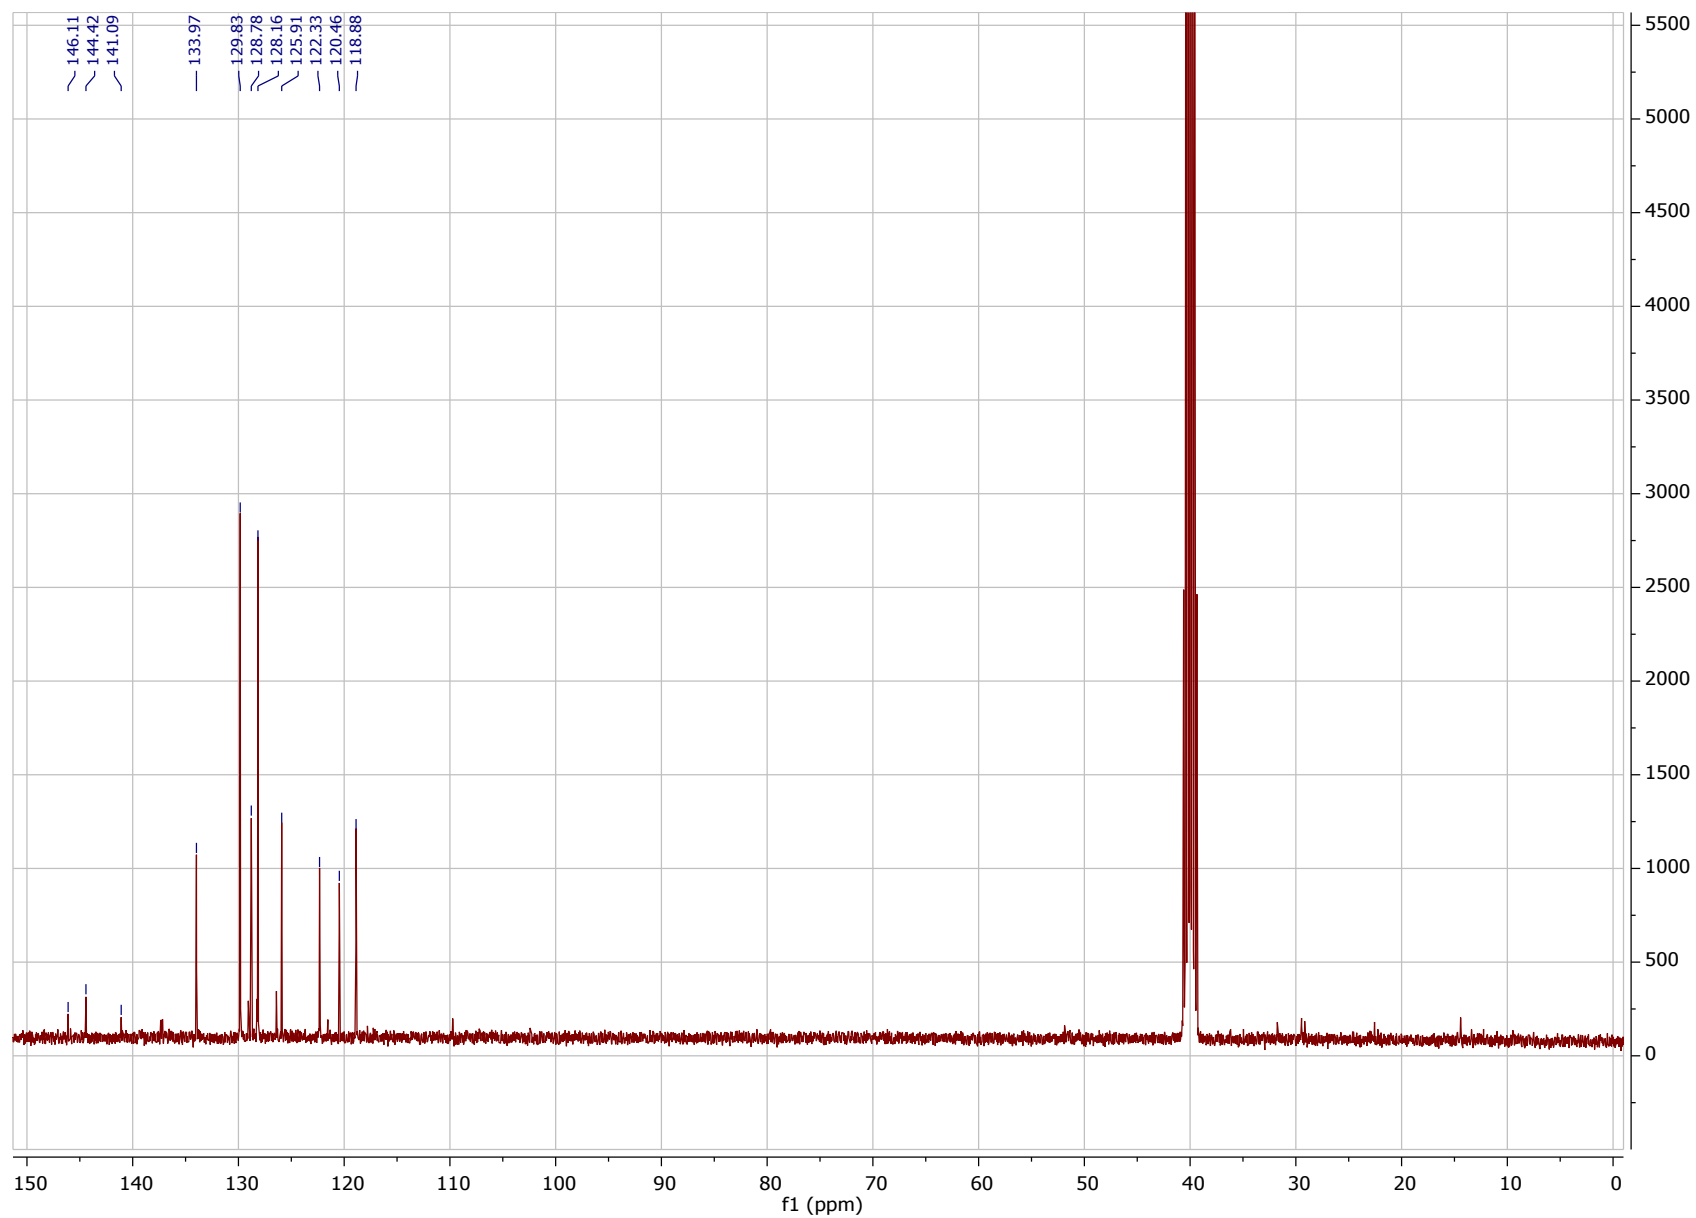

**<sup>1</sup>H NMR of 6-bromo-3-phenylimidazo[1,2-a]pyridine (6b):**

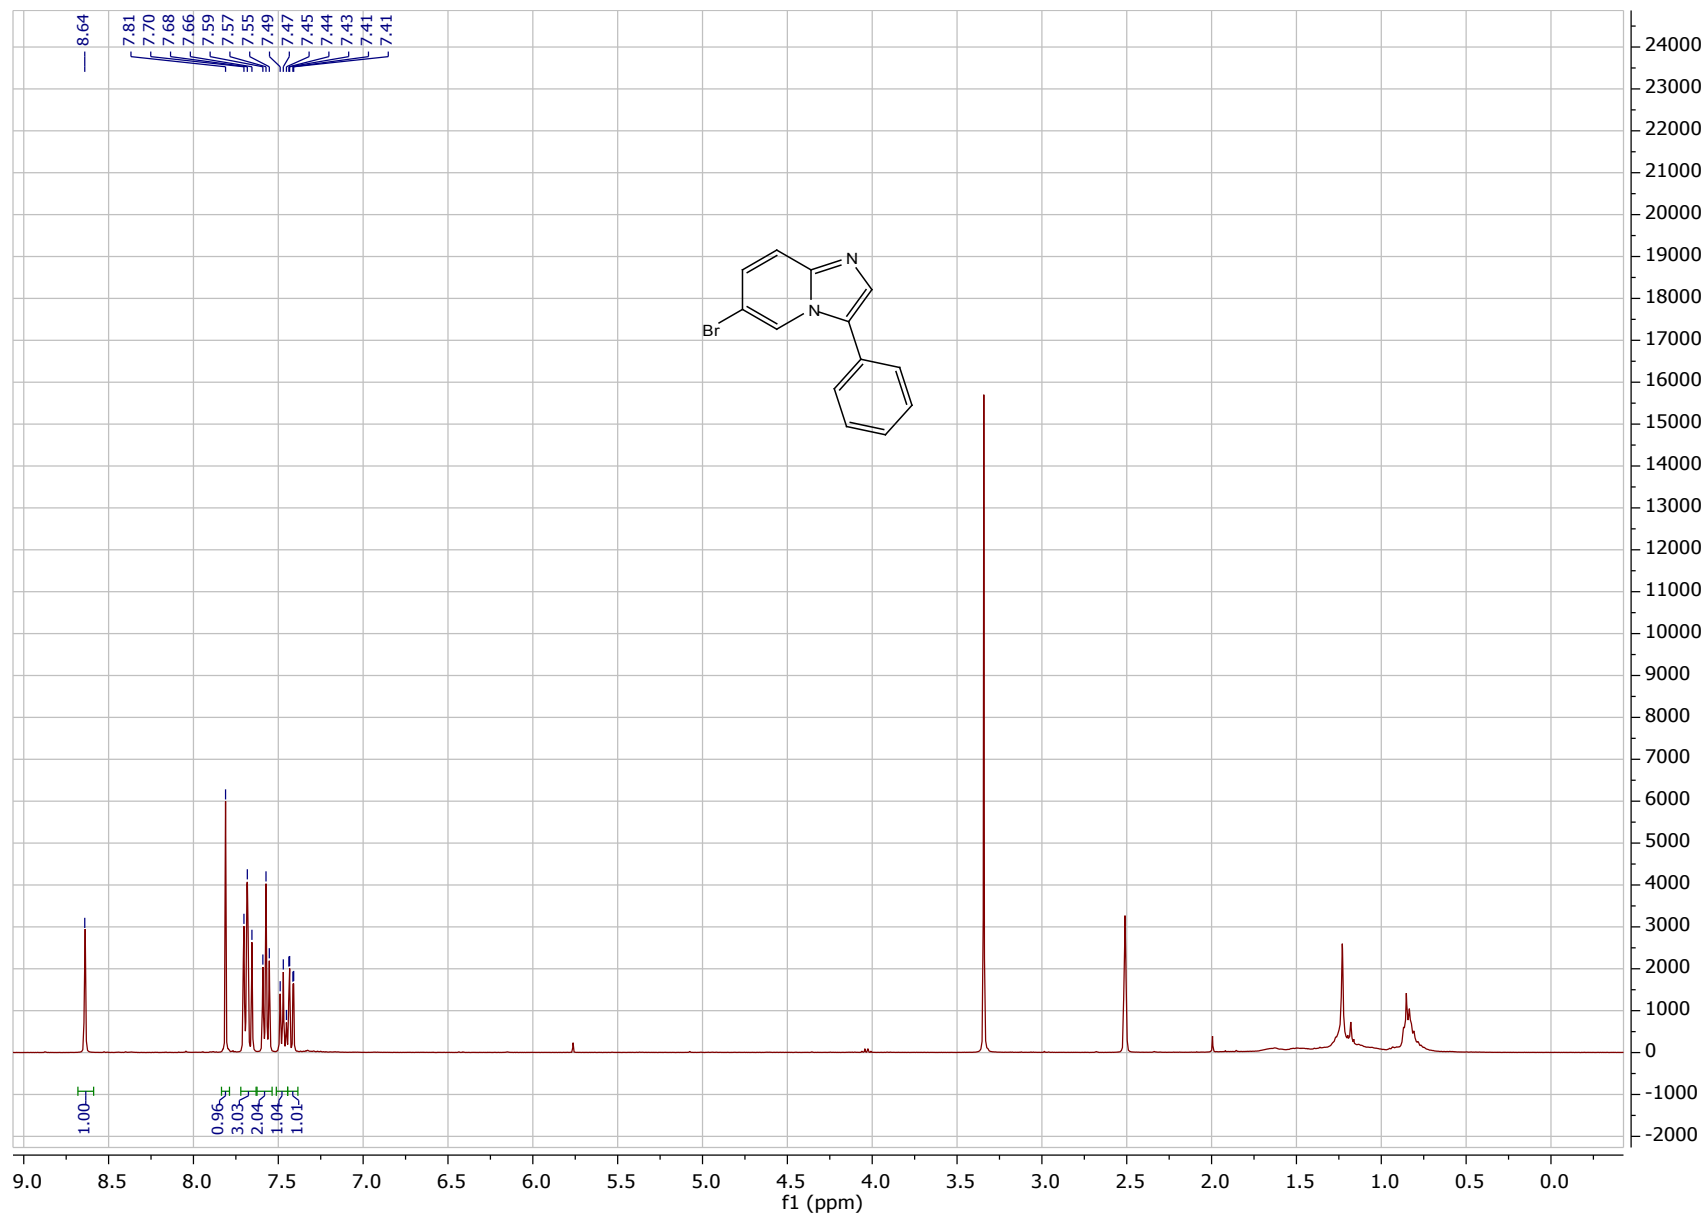

**<sup>13</sup>C NMR of 6-bromo-3-phenylimidazo[1,2-a]pyridine (6b):**

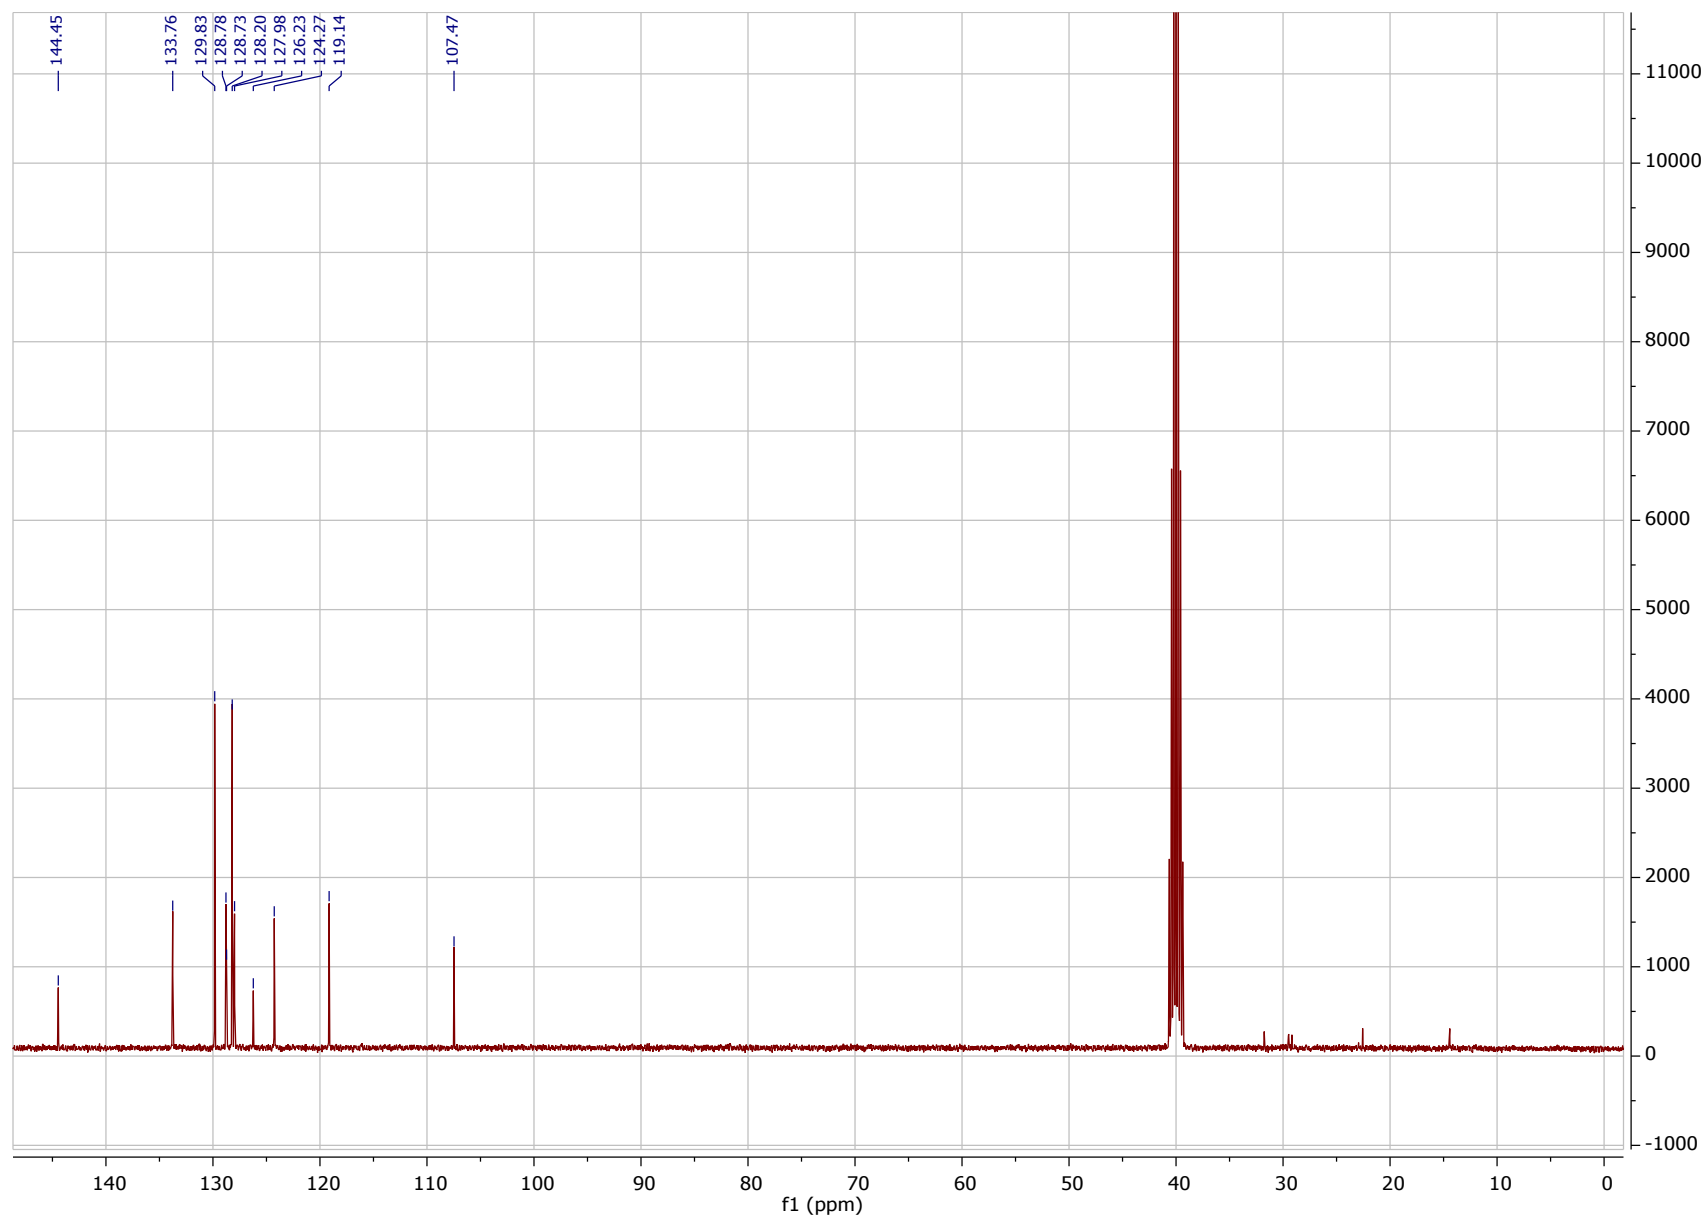

**<sup>1</sup>H NMR of 6-methyl-3-phenylimidazo[1,2-a]pyridine (6c):**

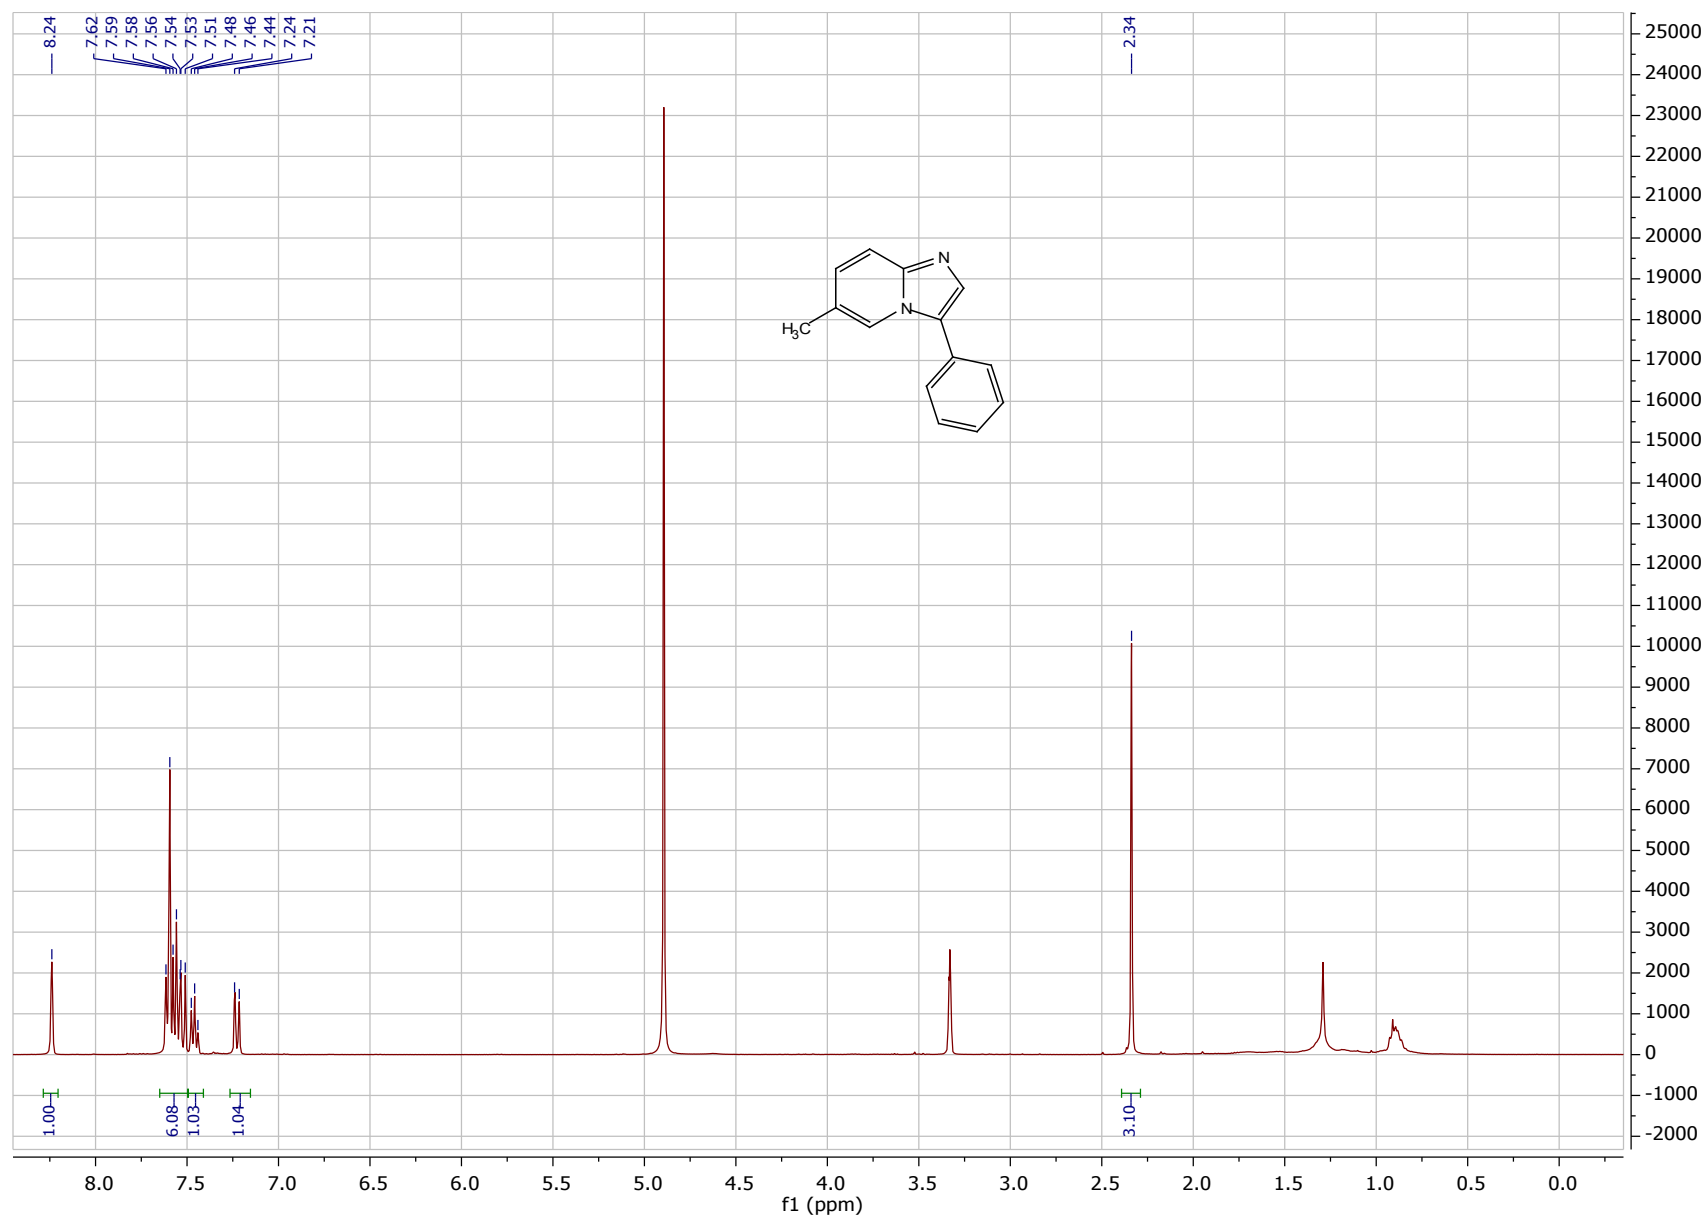

**<sup>13</sup>C NMR of 6-methyl-3-phenylimidazo[1,2-a]pyridine (6c):**

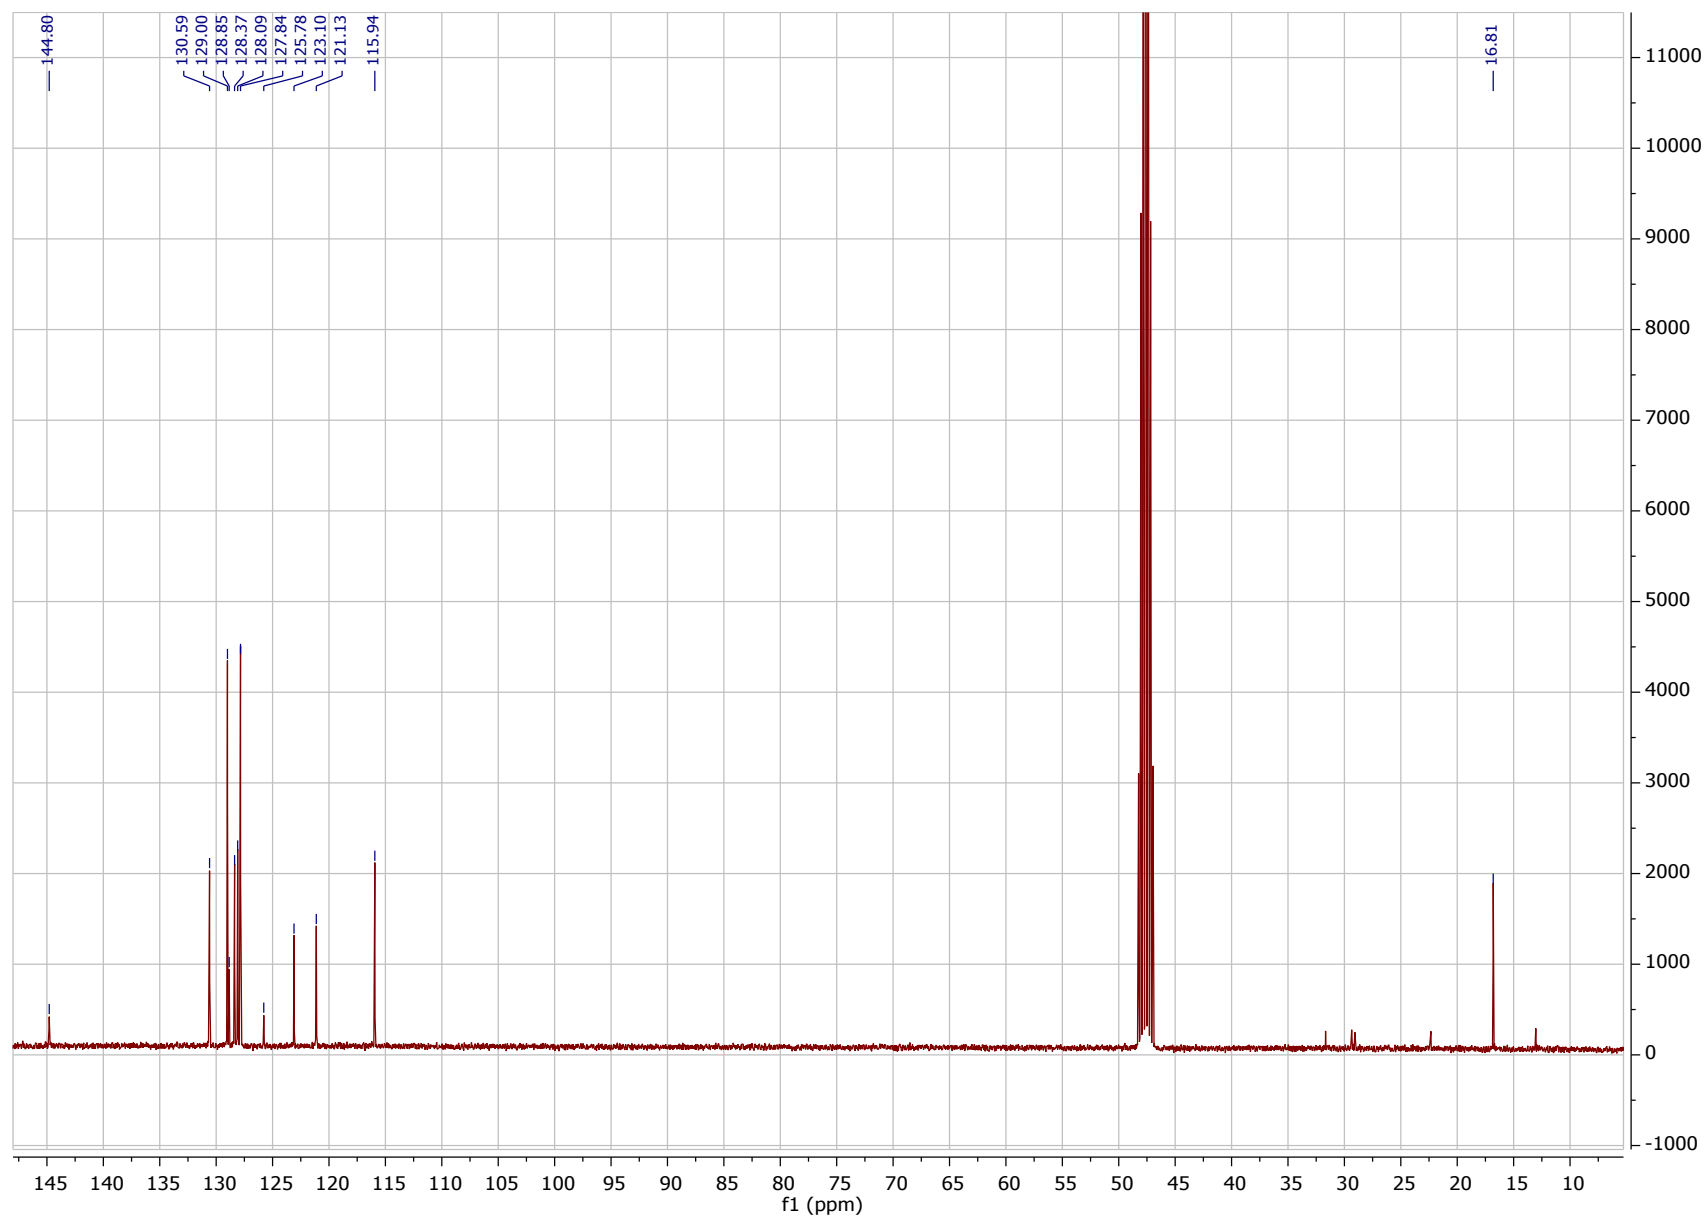

**<sup>1</sup>H NMR of 3-phenyl-6-(trifluoromethyl)imidazo[1,2-a]pyridine (6d):**

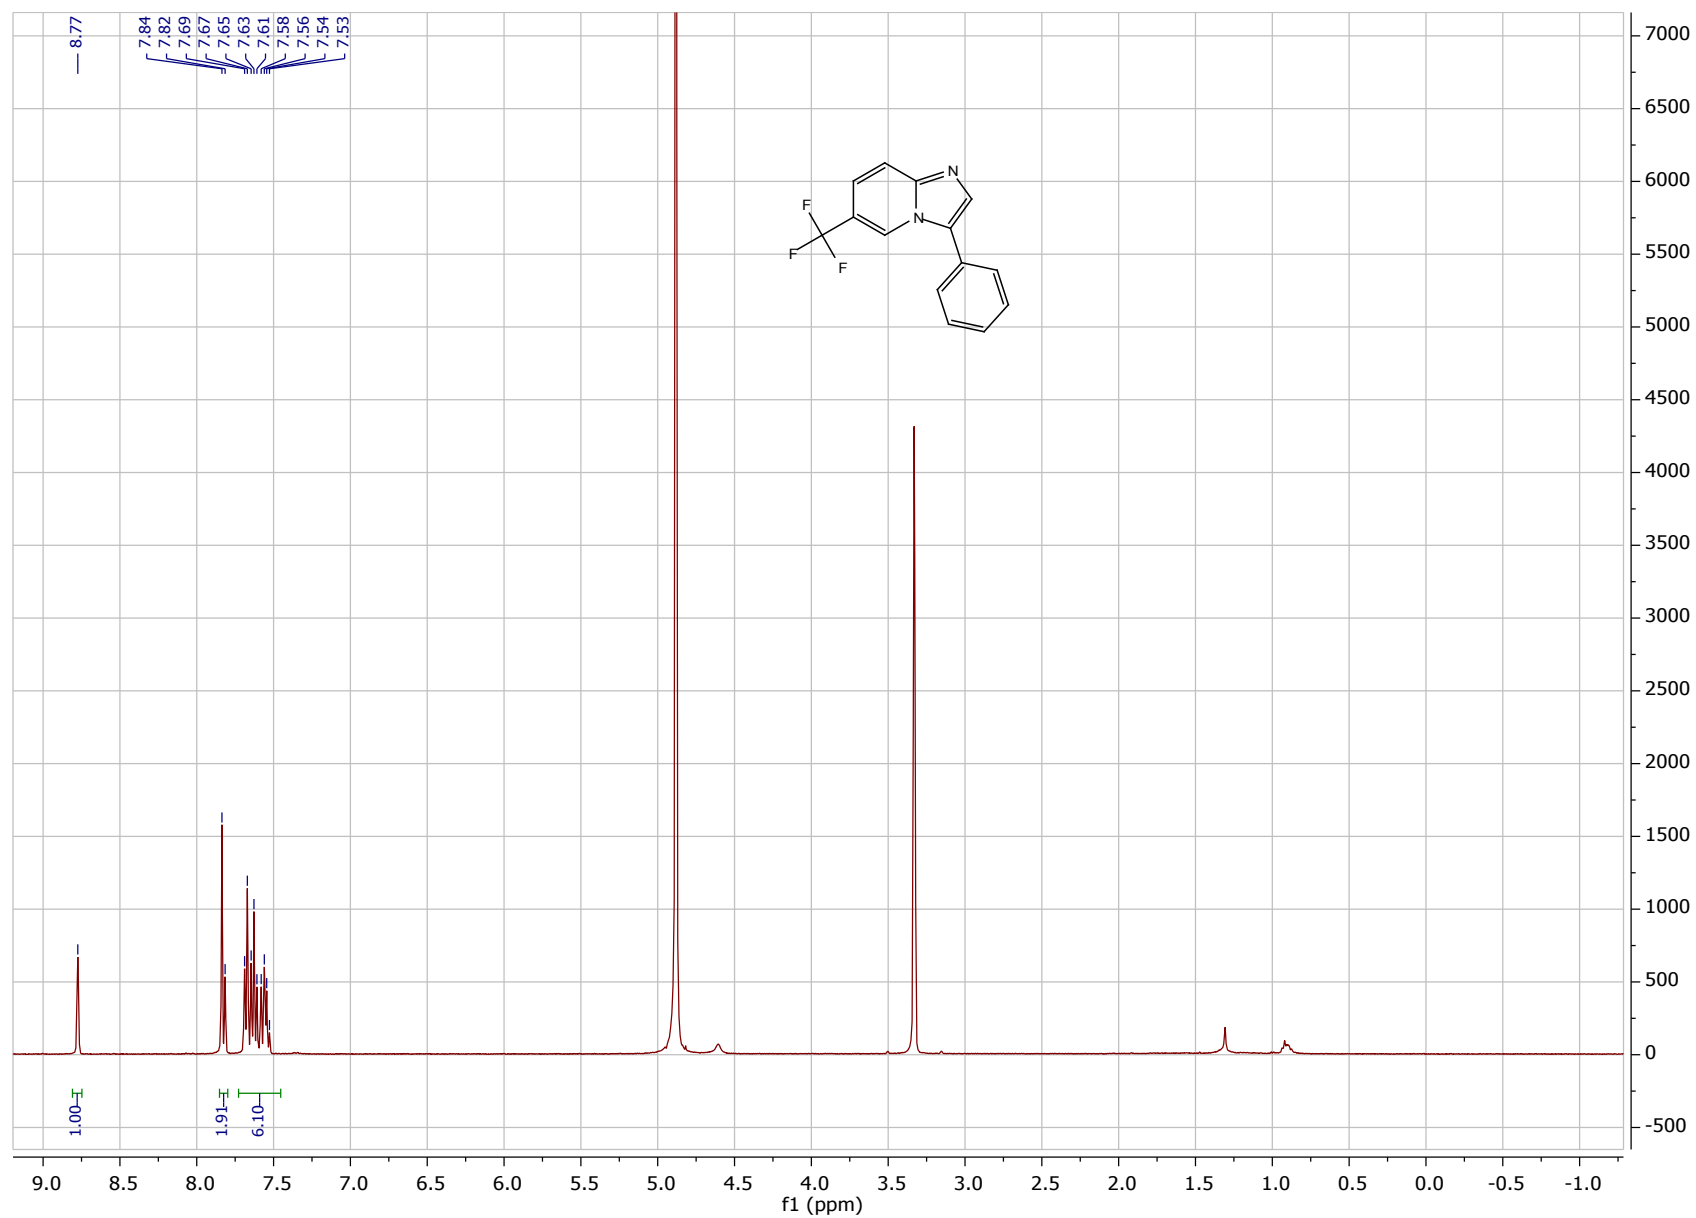

**<sup>13</sup>C NMR of 3-phenyl-6-(trifluoromethyl)imidazo[1,2-a]pyridine (6d):**

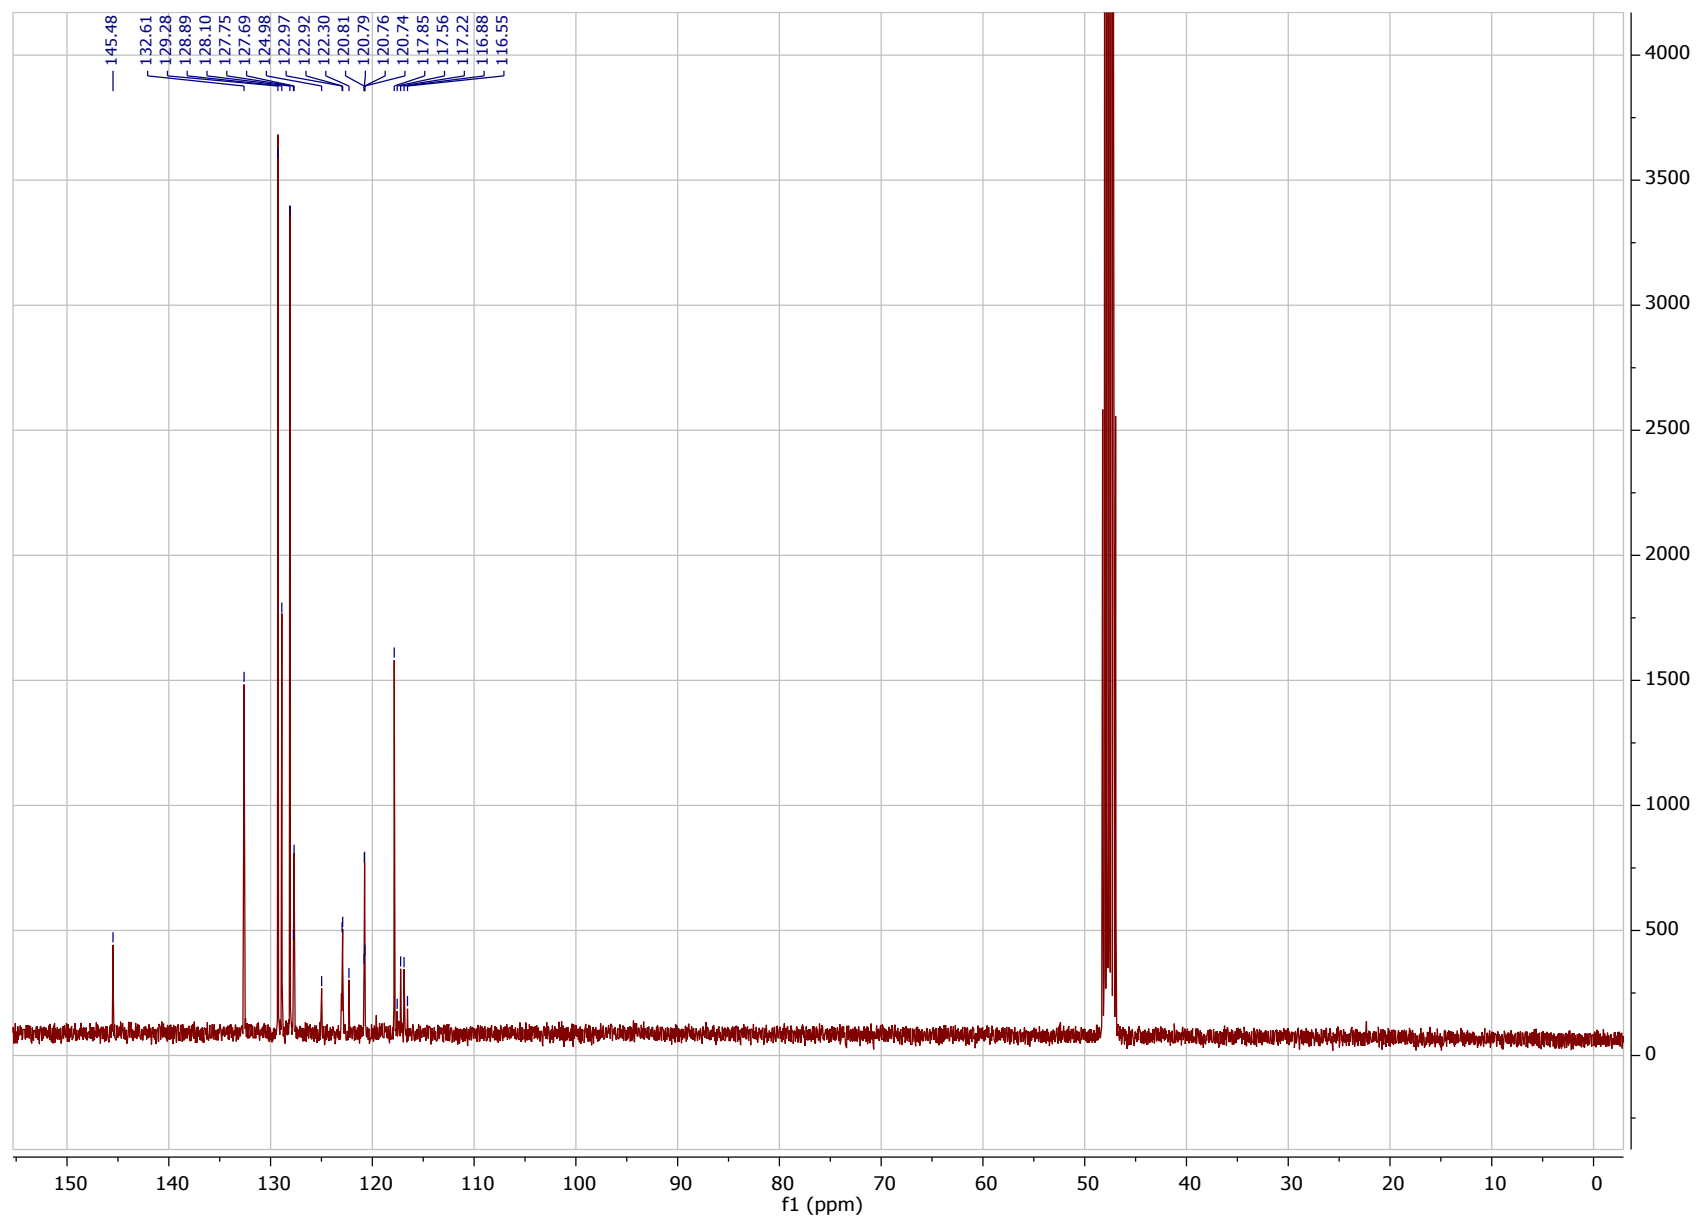

**<sup>1</sup>H NMR of 3-ethynylimidazo[1,2-a]pyridine (9a):**

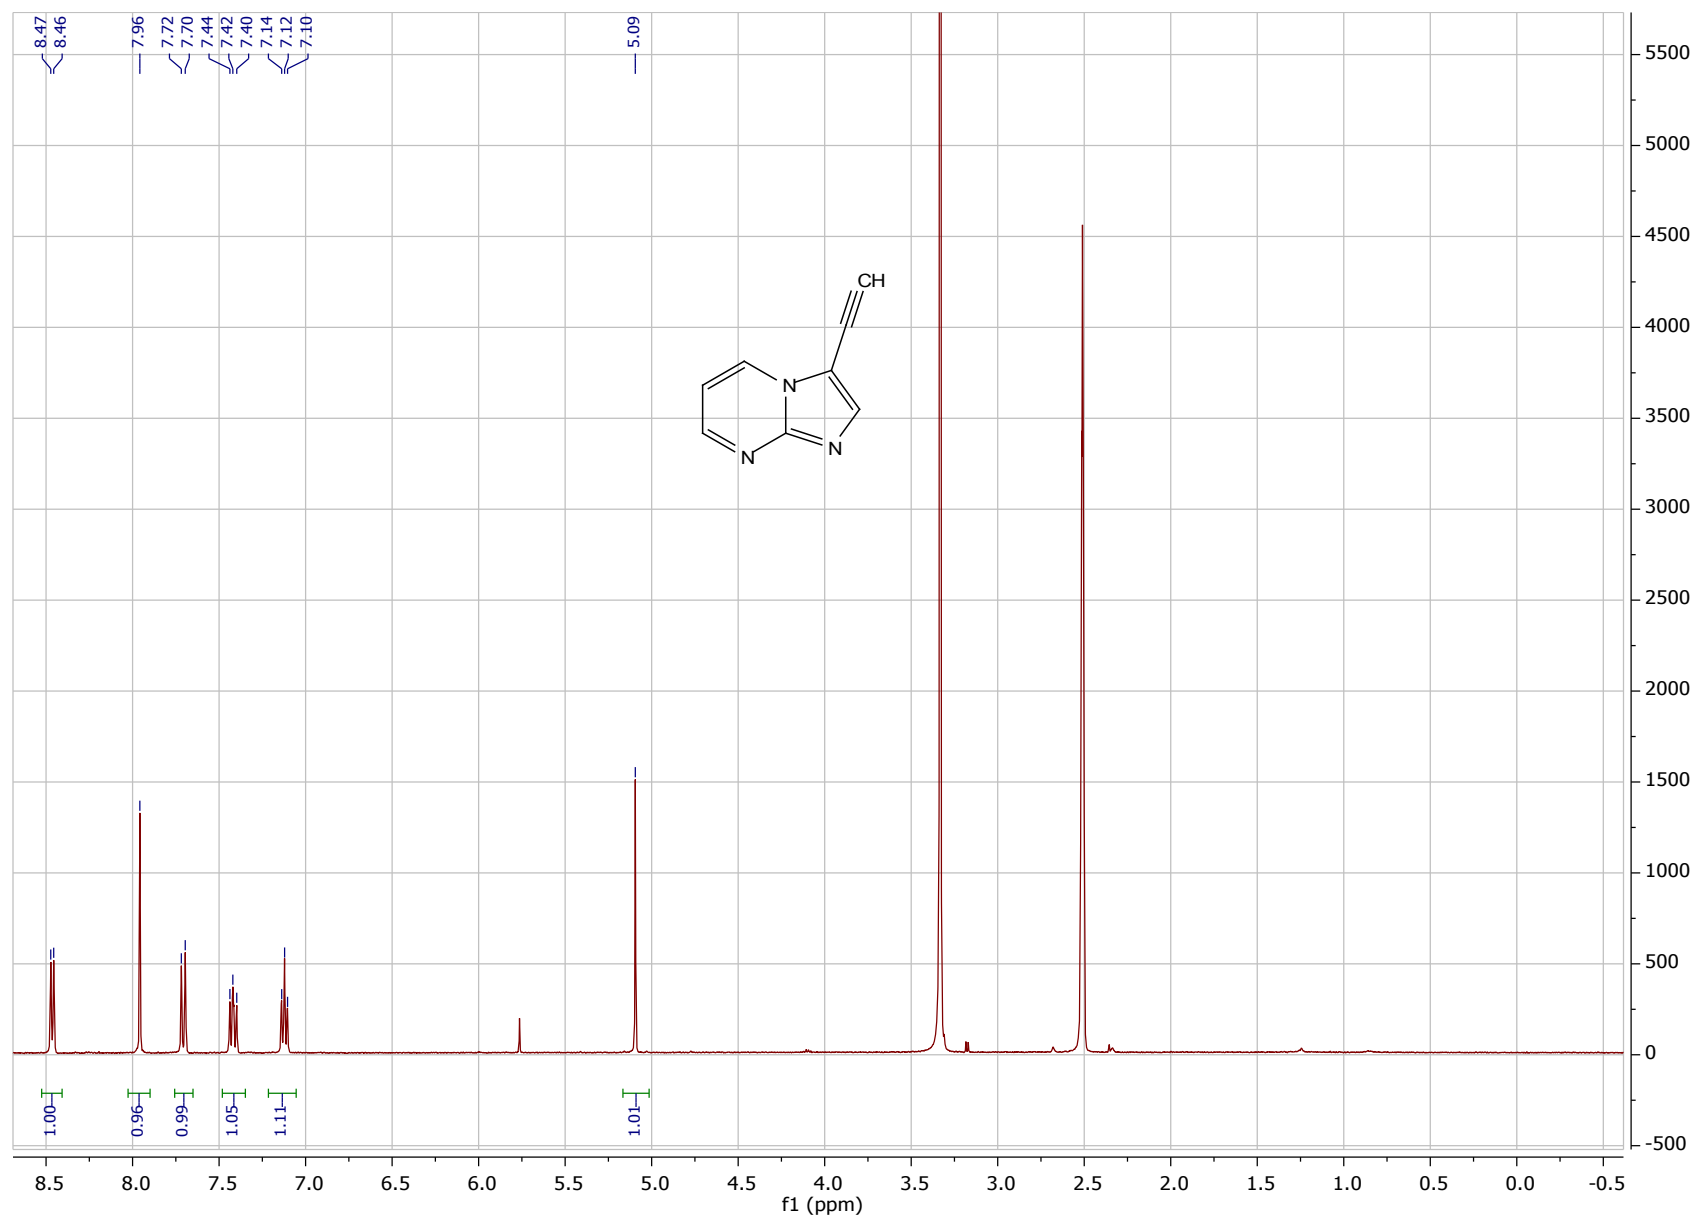



**<sup>13</sup>C NMR of 3-ethynylimidazo[1,2-a]pyridine (9a):**

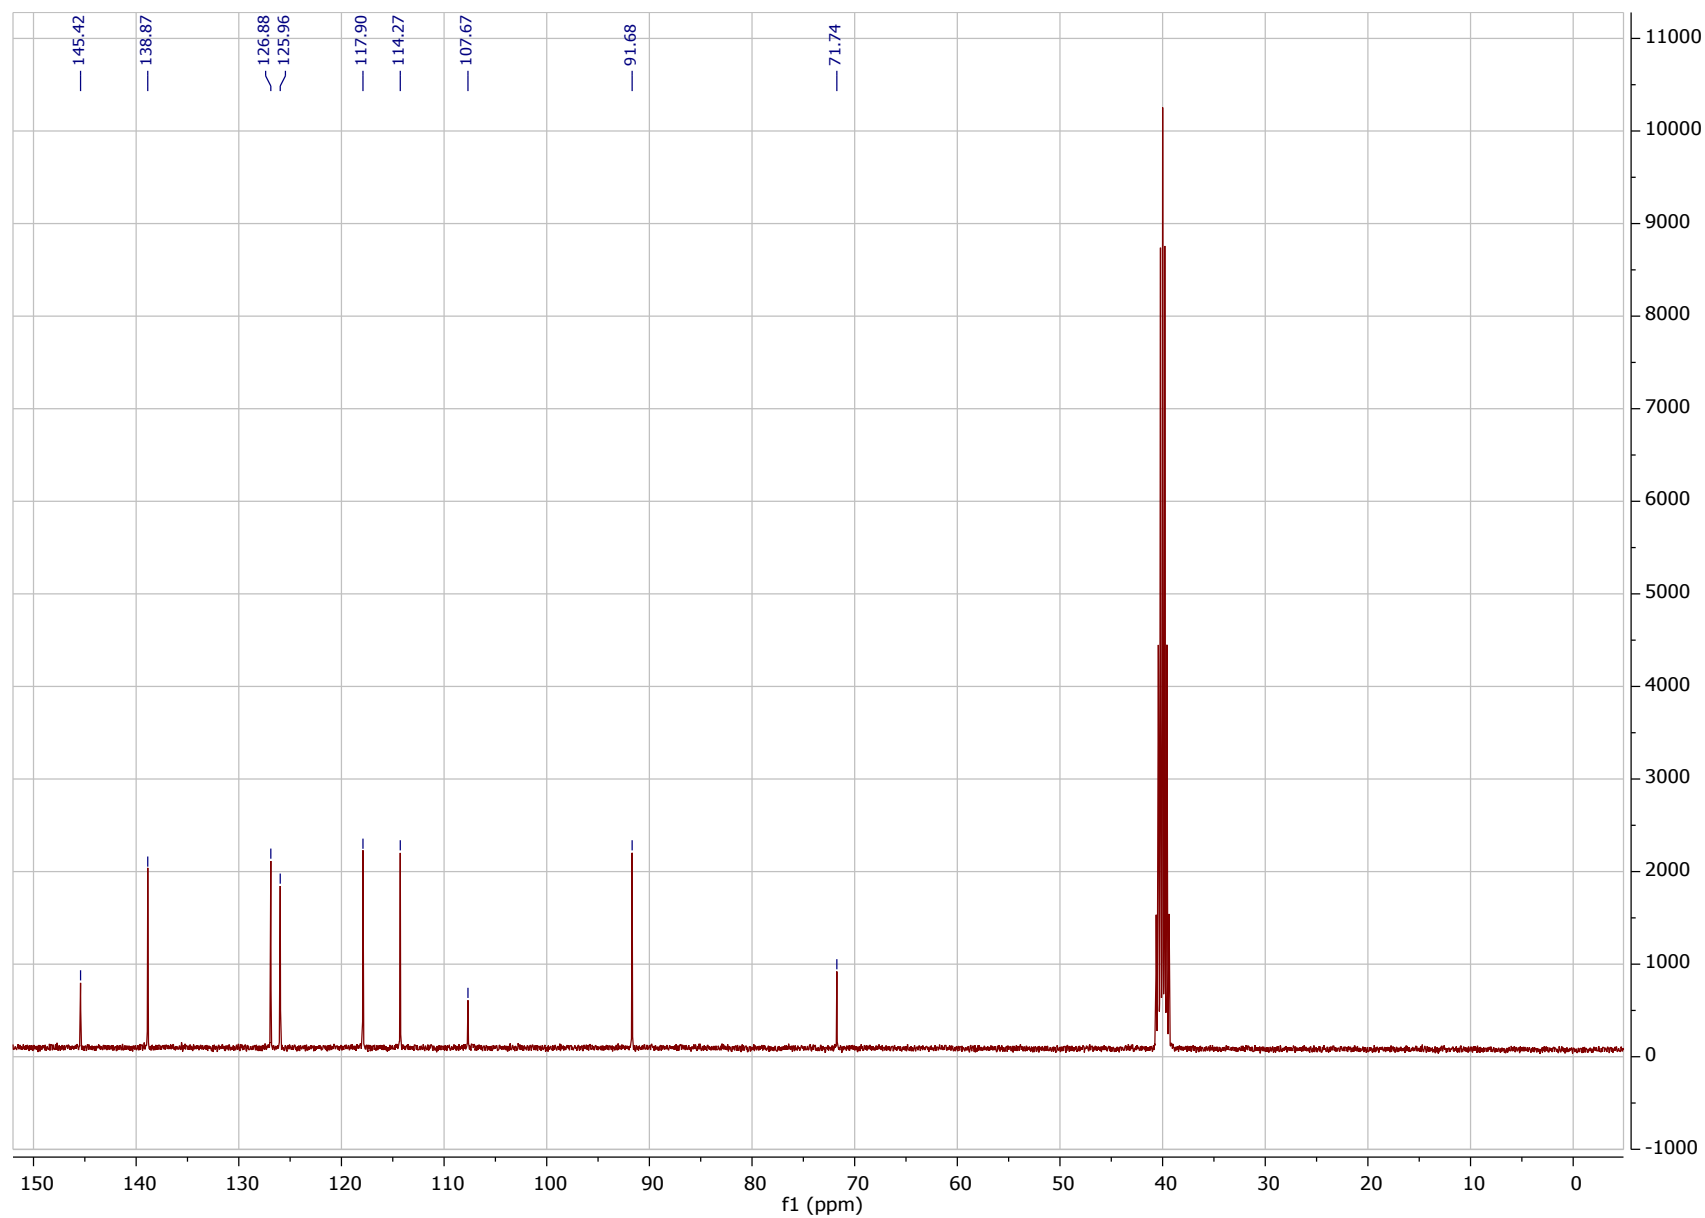

**<sup>1</sup>H NMR of 3-vinylimidazo[1,2-a]pyridine (9b):**

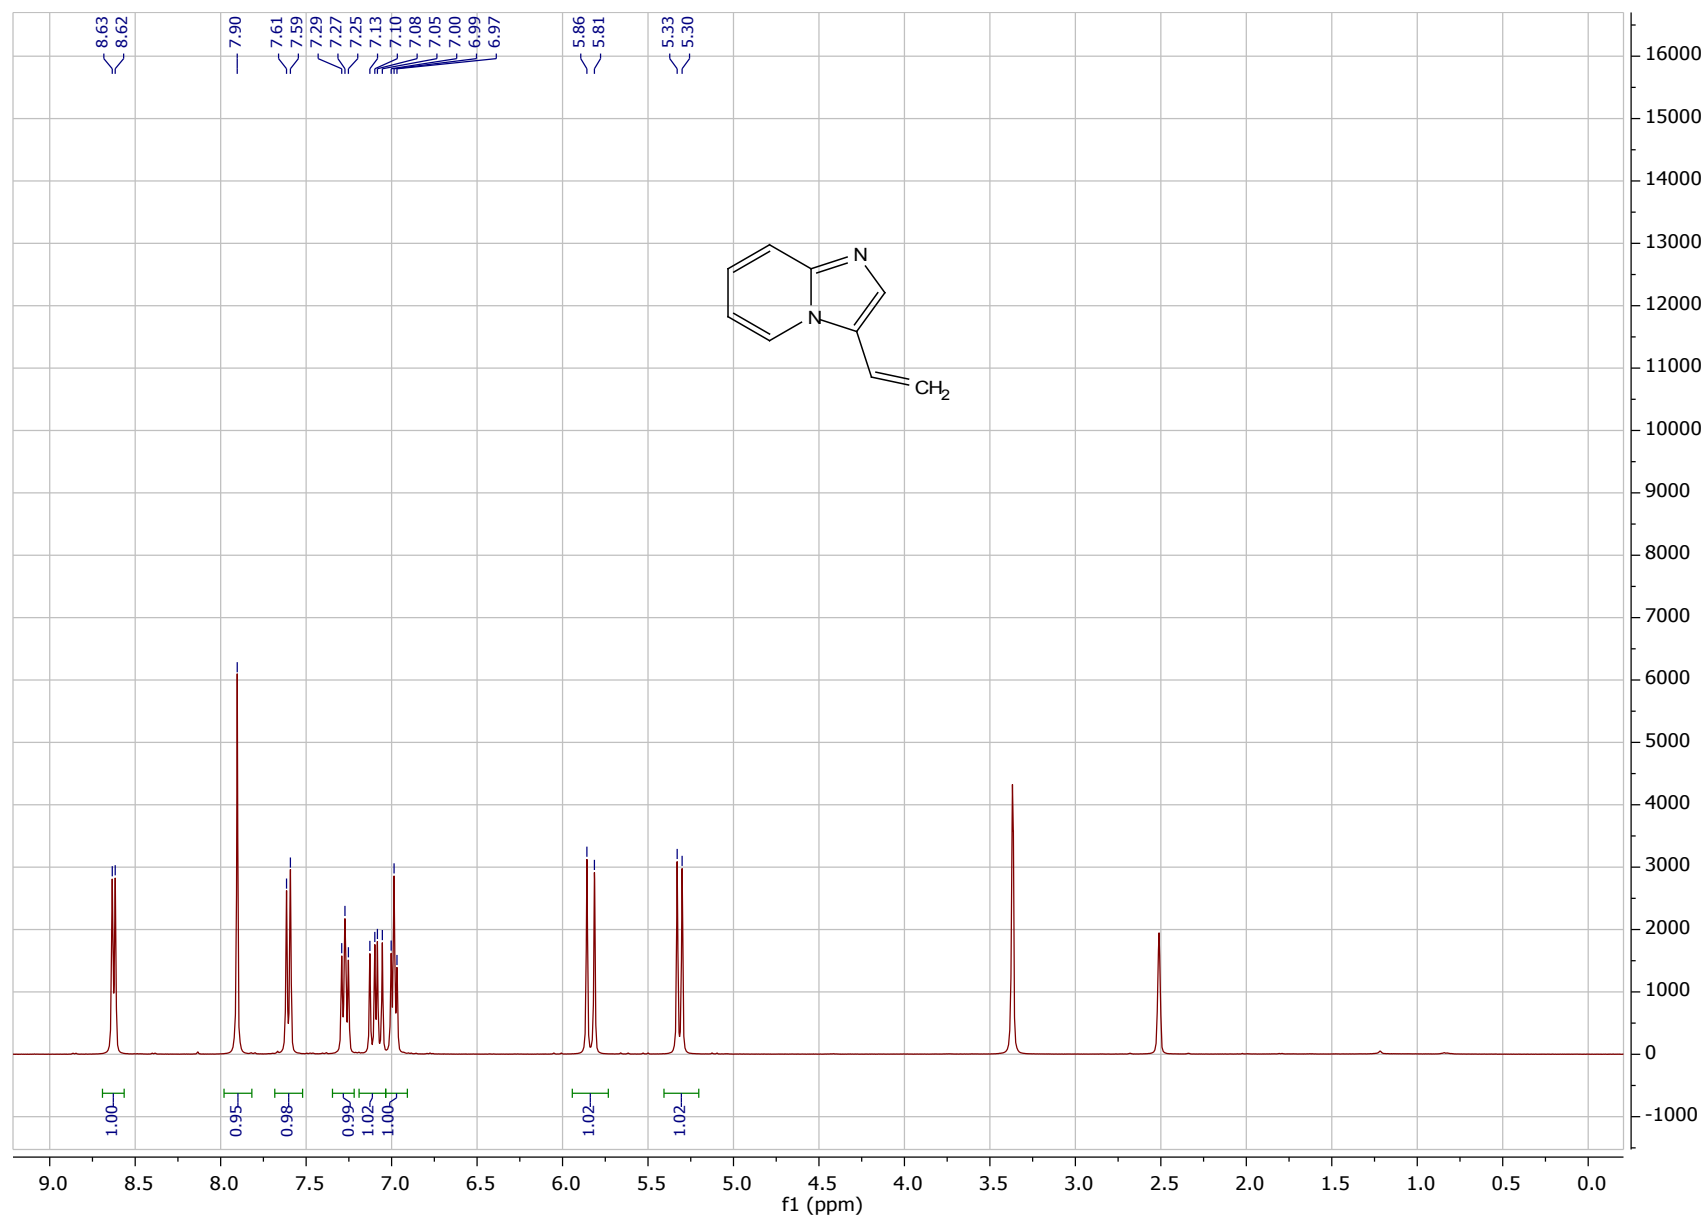

**<sup>13</sup>C NMR of 3-vinylimidazo[1,2-a]pyridine (9b):**

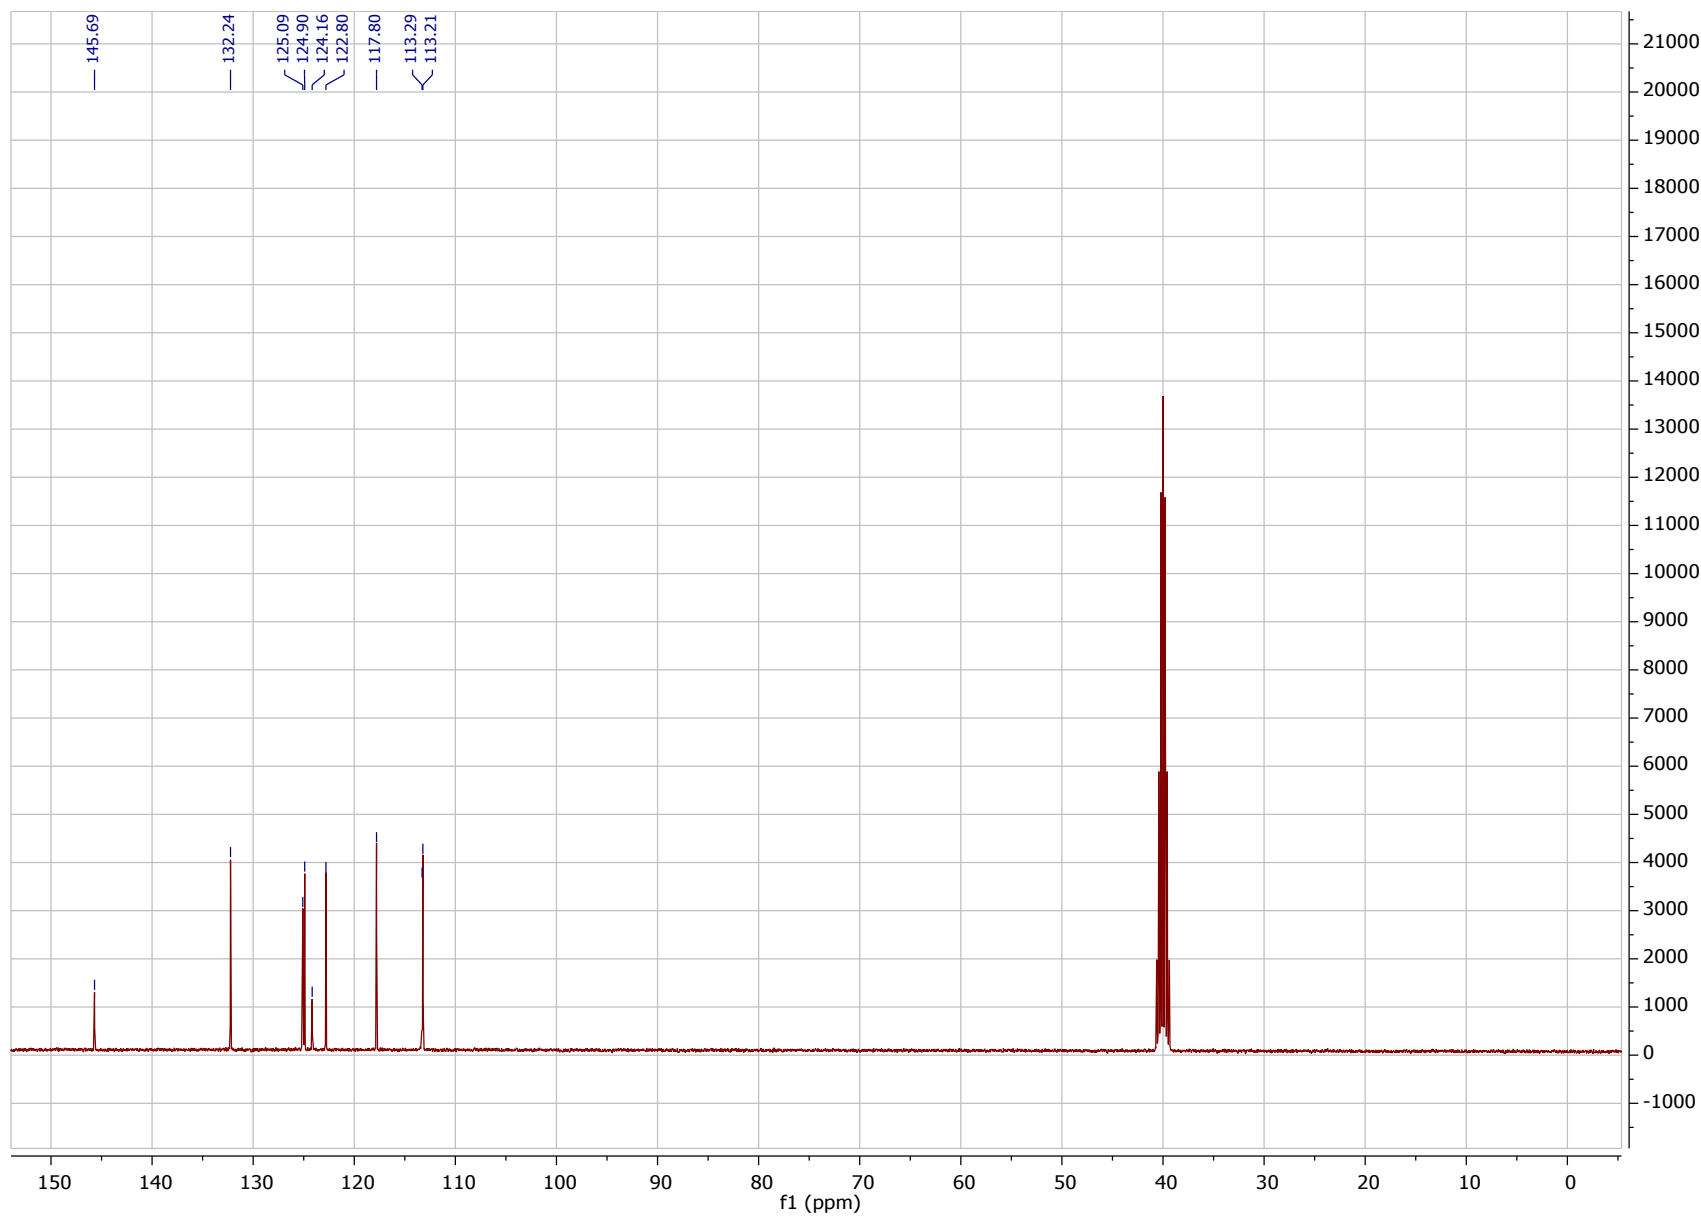

**<sup>1</sup>H NMR of 3-(prop-1-en-2-yl)imidazo[1,2-a]pyridine (9c):**

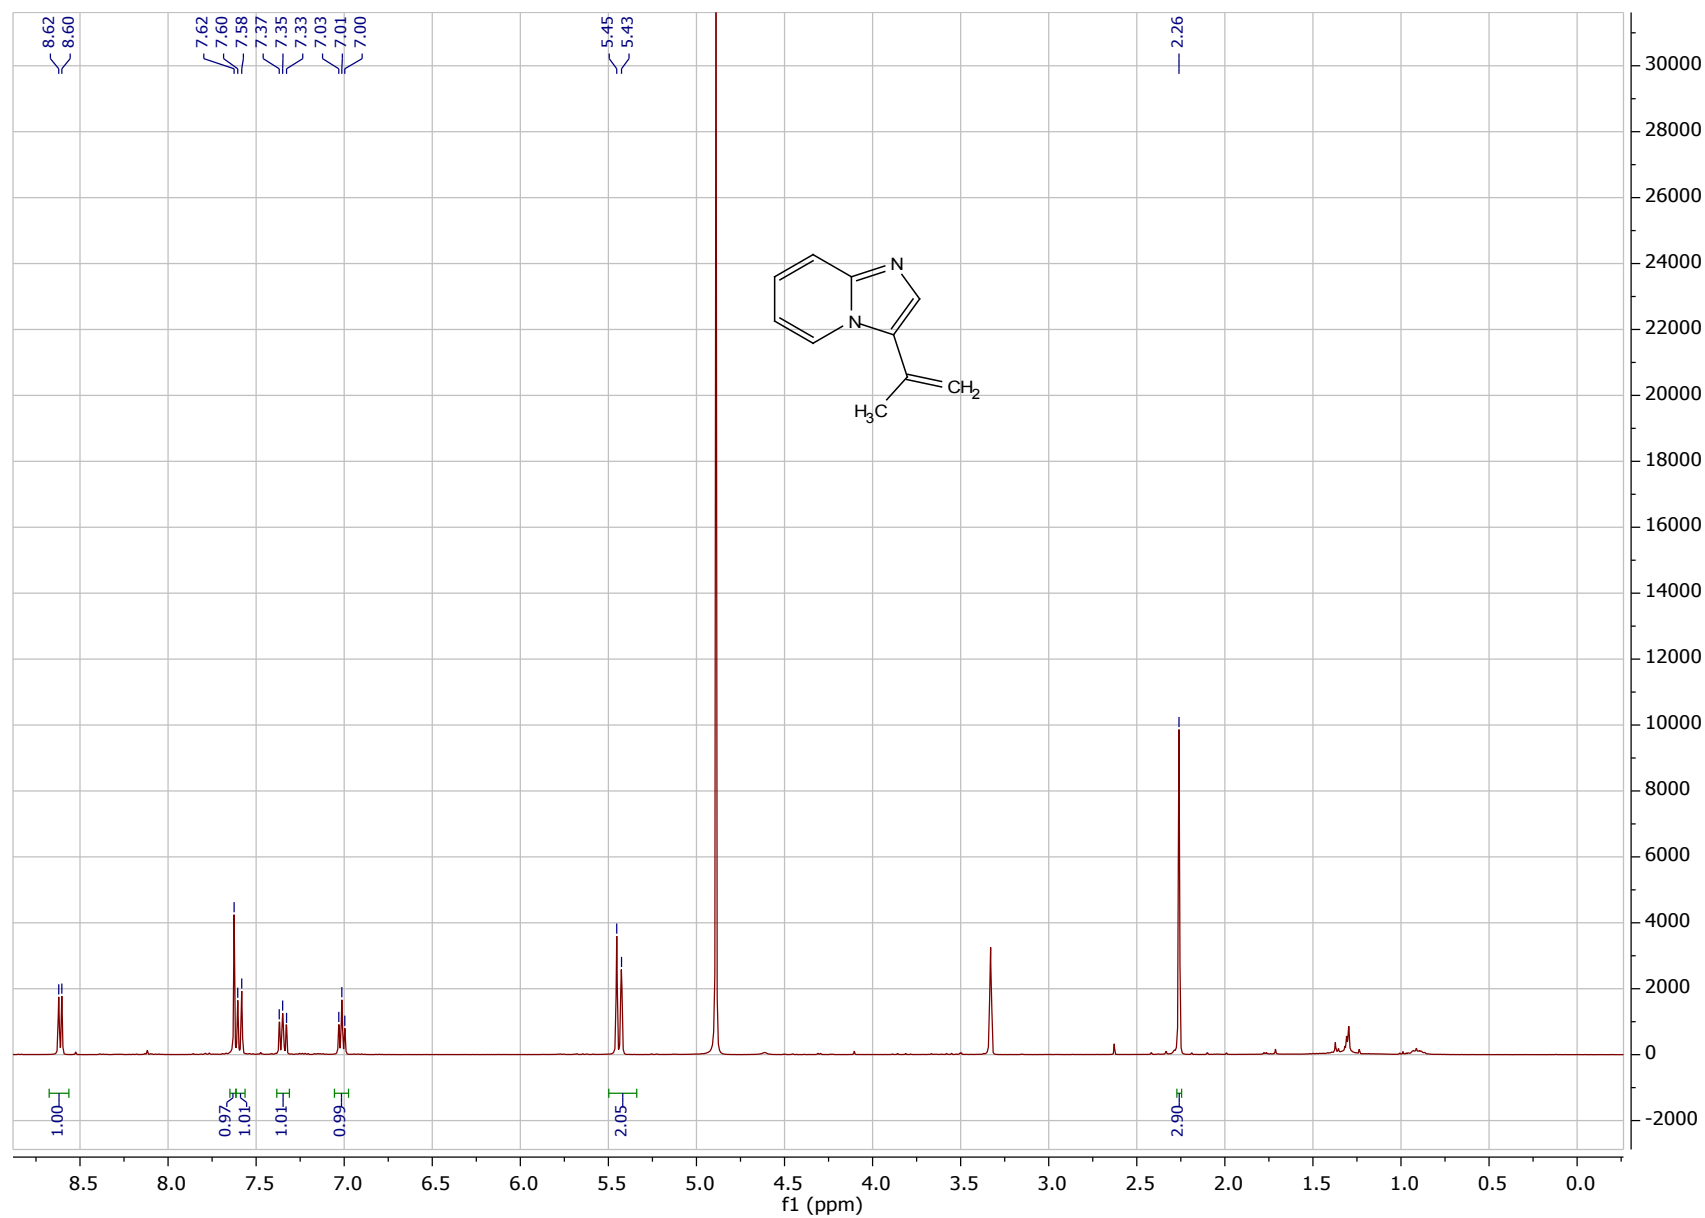

**<sup>13</sup>C NMR of 3-(prop-1-en-2-yl)imidazo[1,2-a]pyridine (9c):**

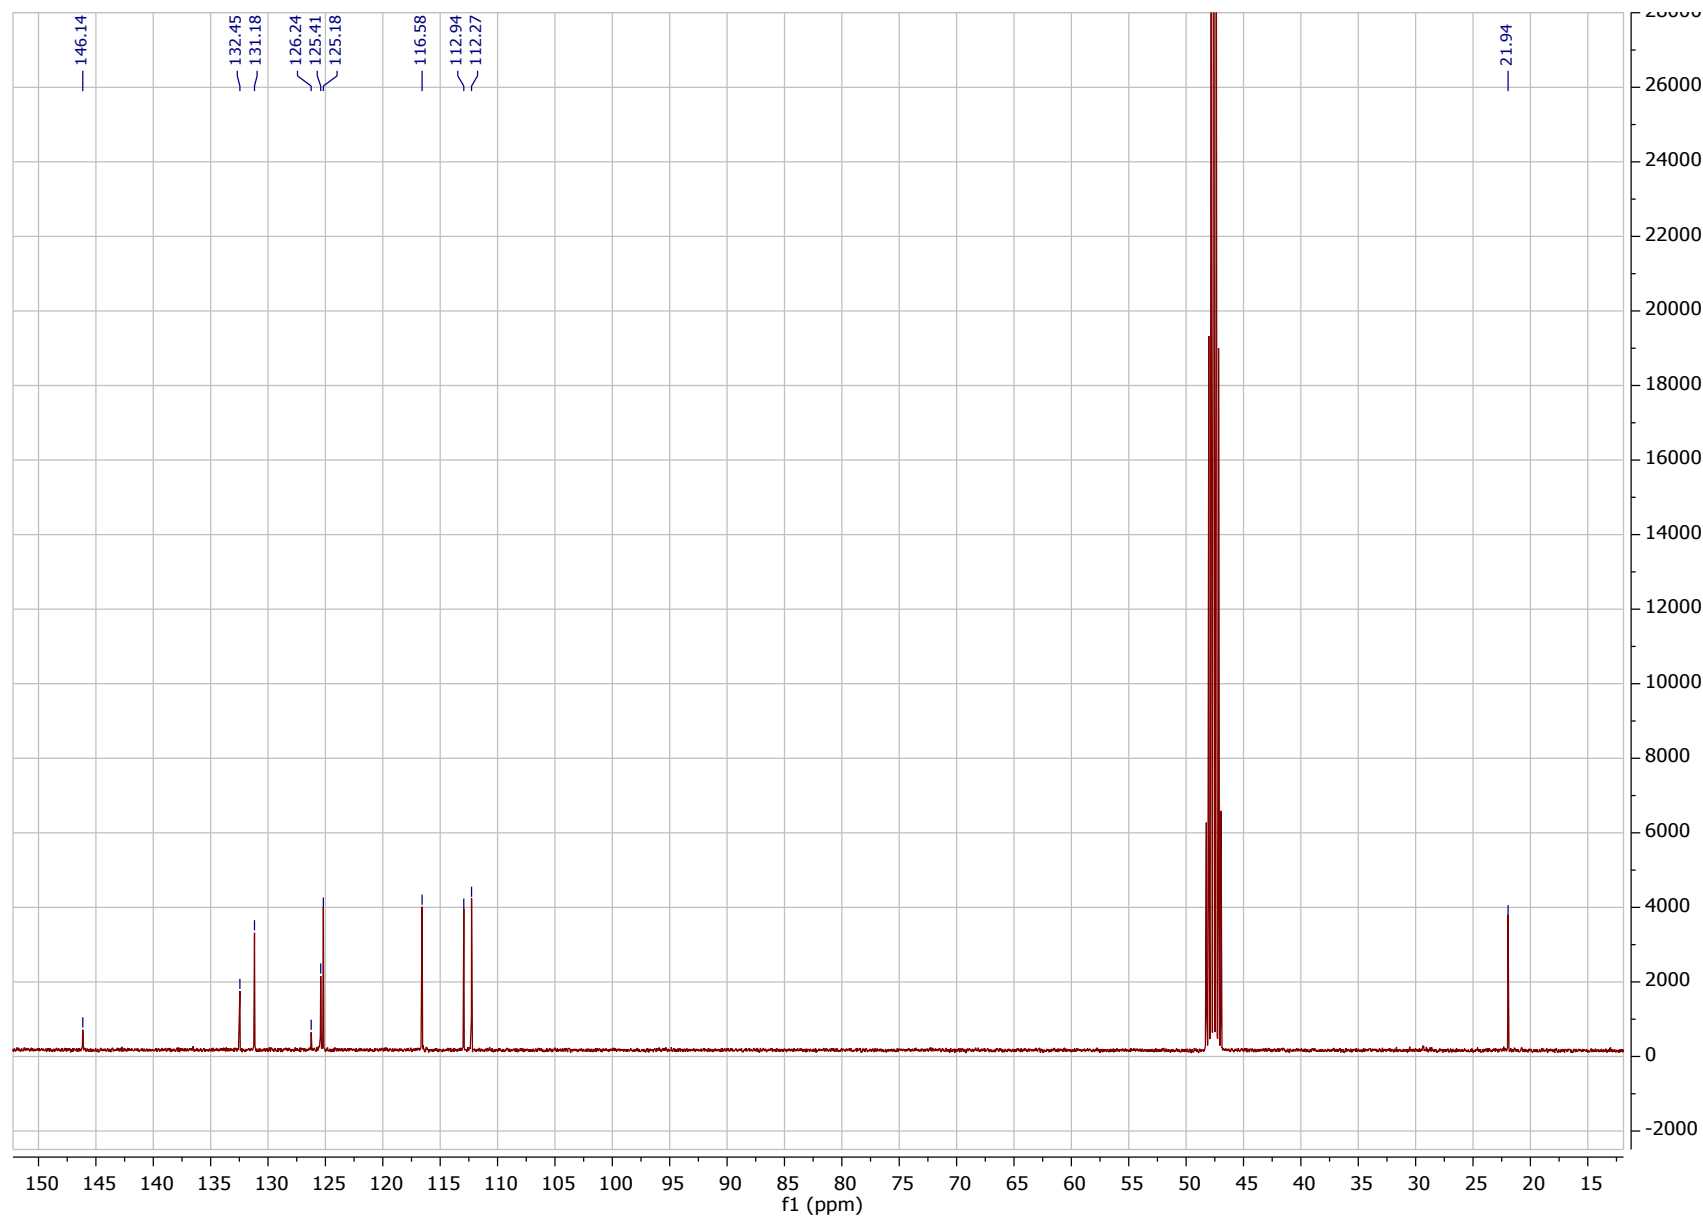

**<sup>1</sup>H NMR of (*E*)-3-(prop-1-en-1-yl)imidazo[1,2-a]pyridine (9d):**

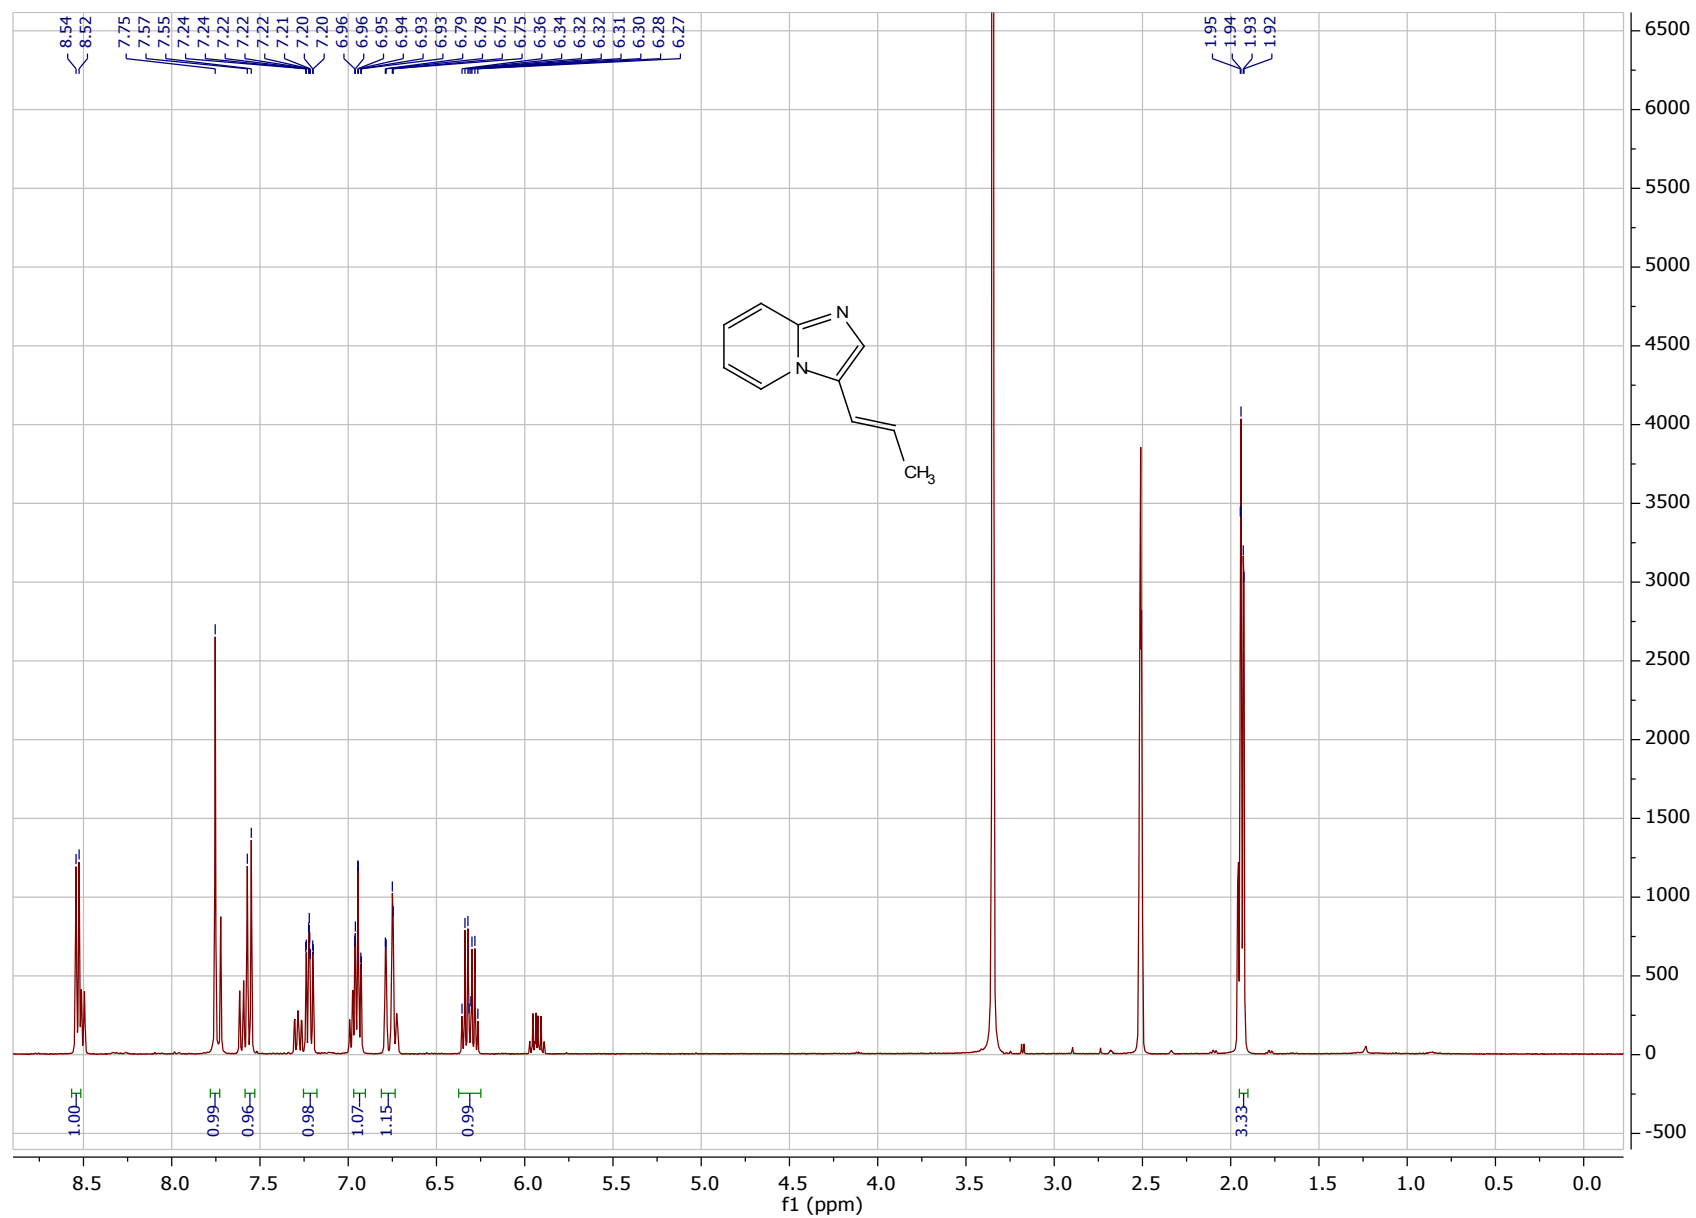

**<sup>13</sup>C NMR of (*E*)-3-(prop-1-en-1-yl)imidazo[1,2-a]pyridine (9d):**

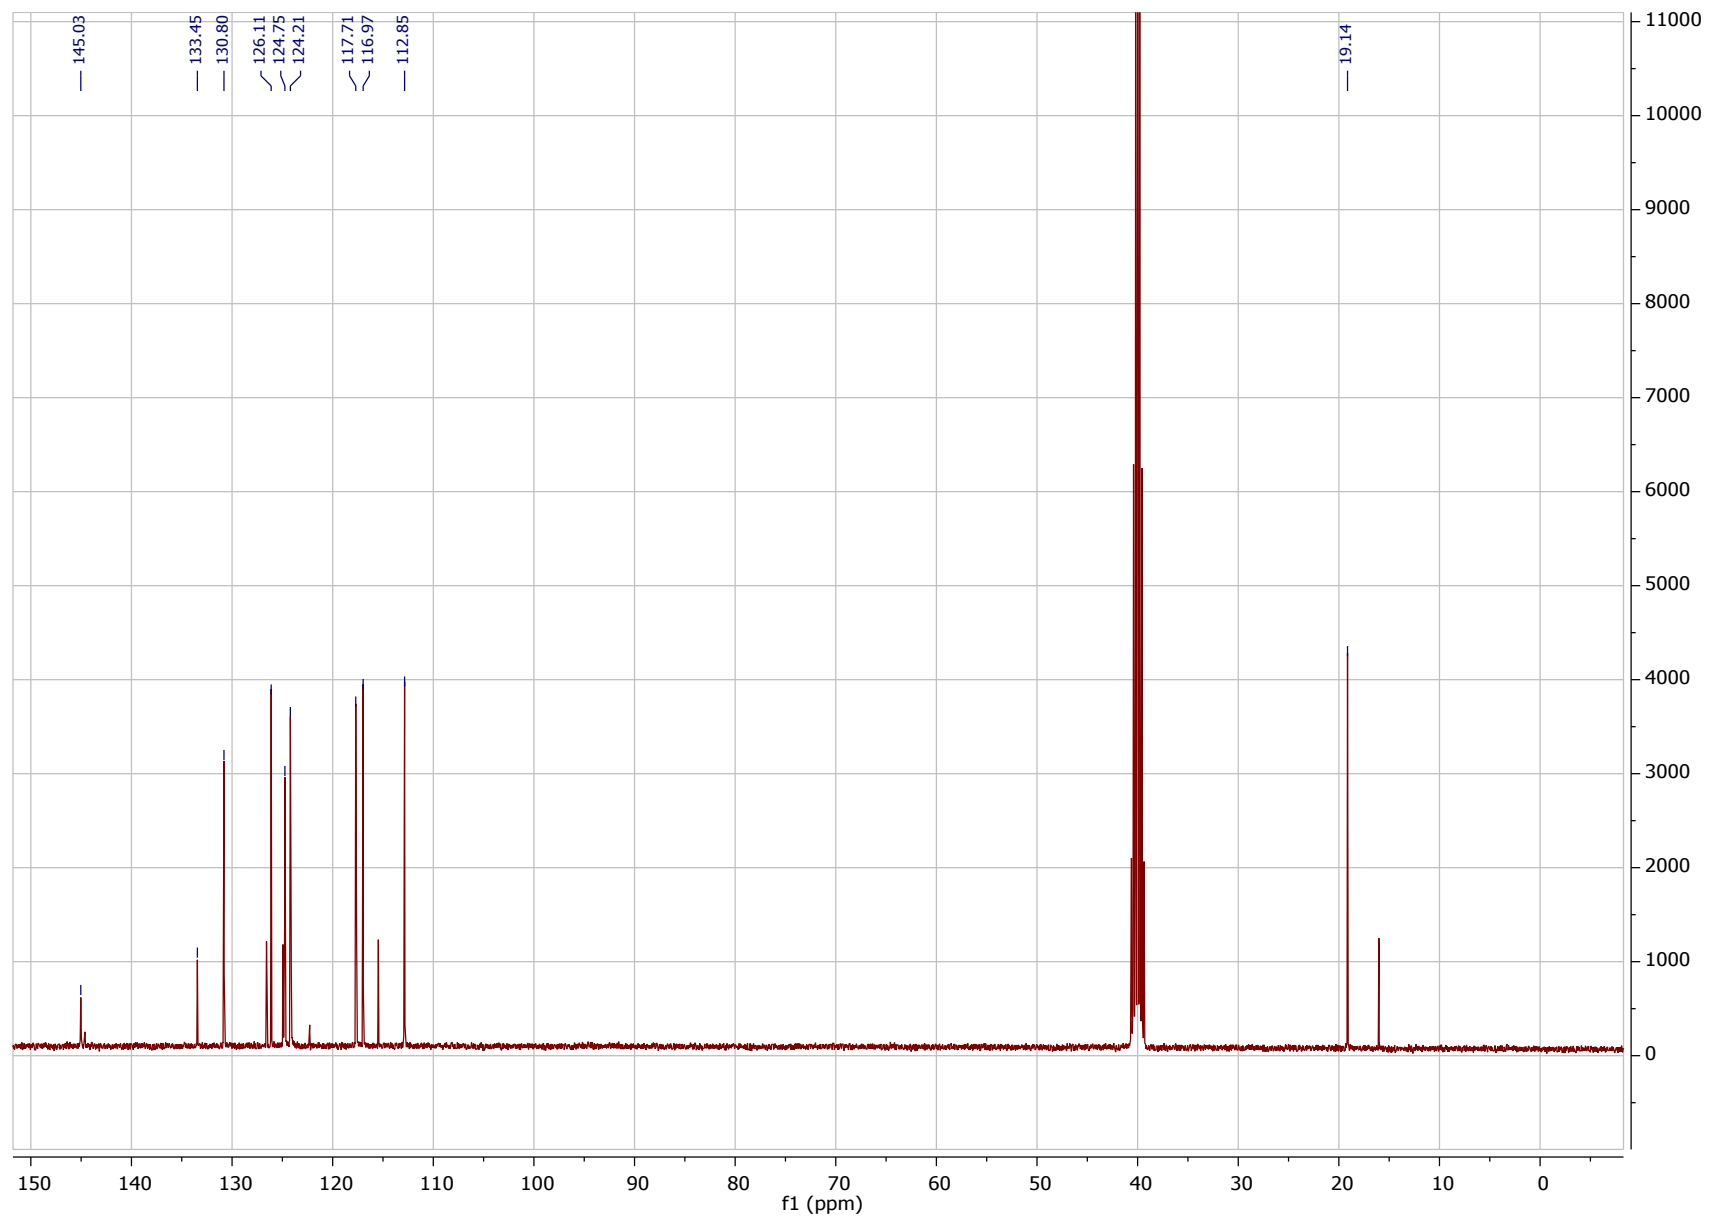

**<sup>1</sup>H NMR of (E)-3-(2,6-dimethylhepta-1,5-dien-1-yl)imidazo[1,2-a]pyridine (9e):**

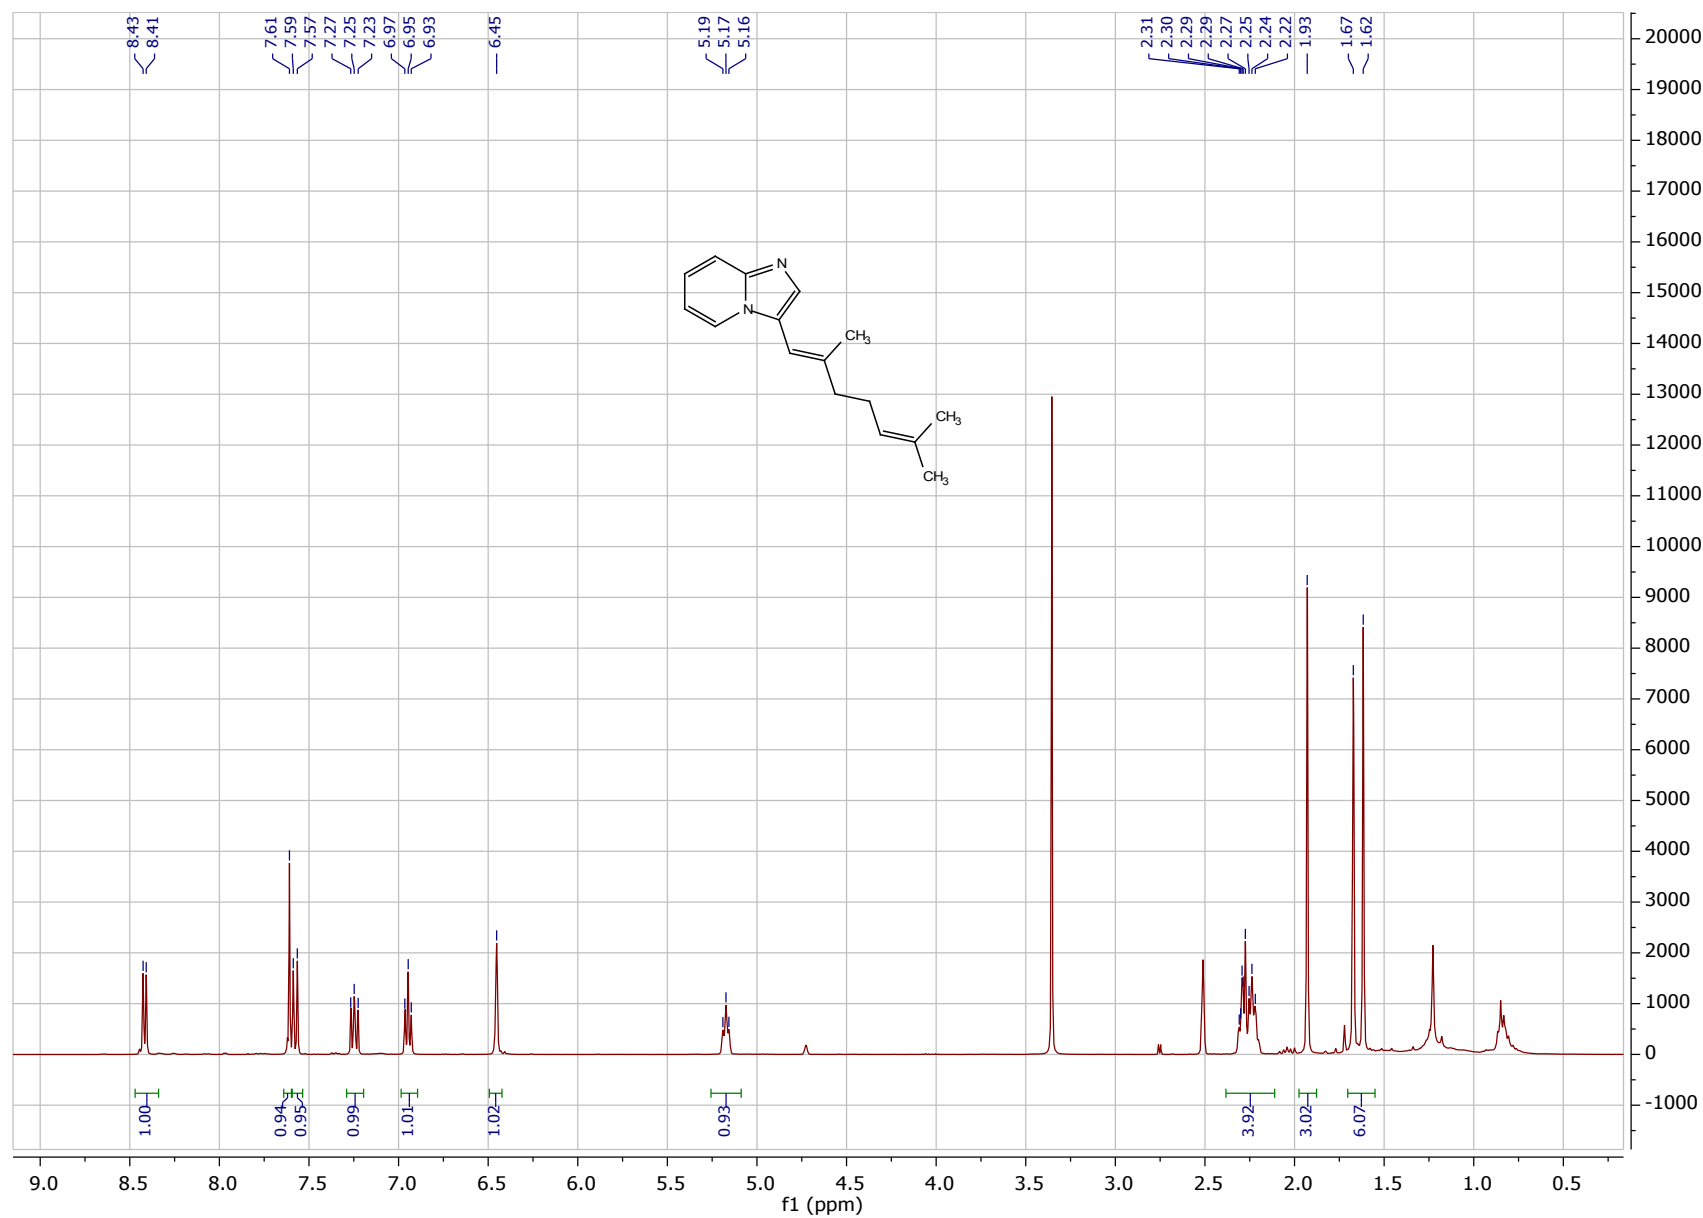



**<sup>13</sup>C NMR of (E)-3-(2,6-dimethylhepta-1,5-dien-1-yl)imidazo[1,2-a]pyridine (9e):**

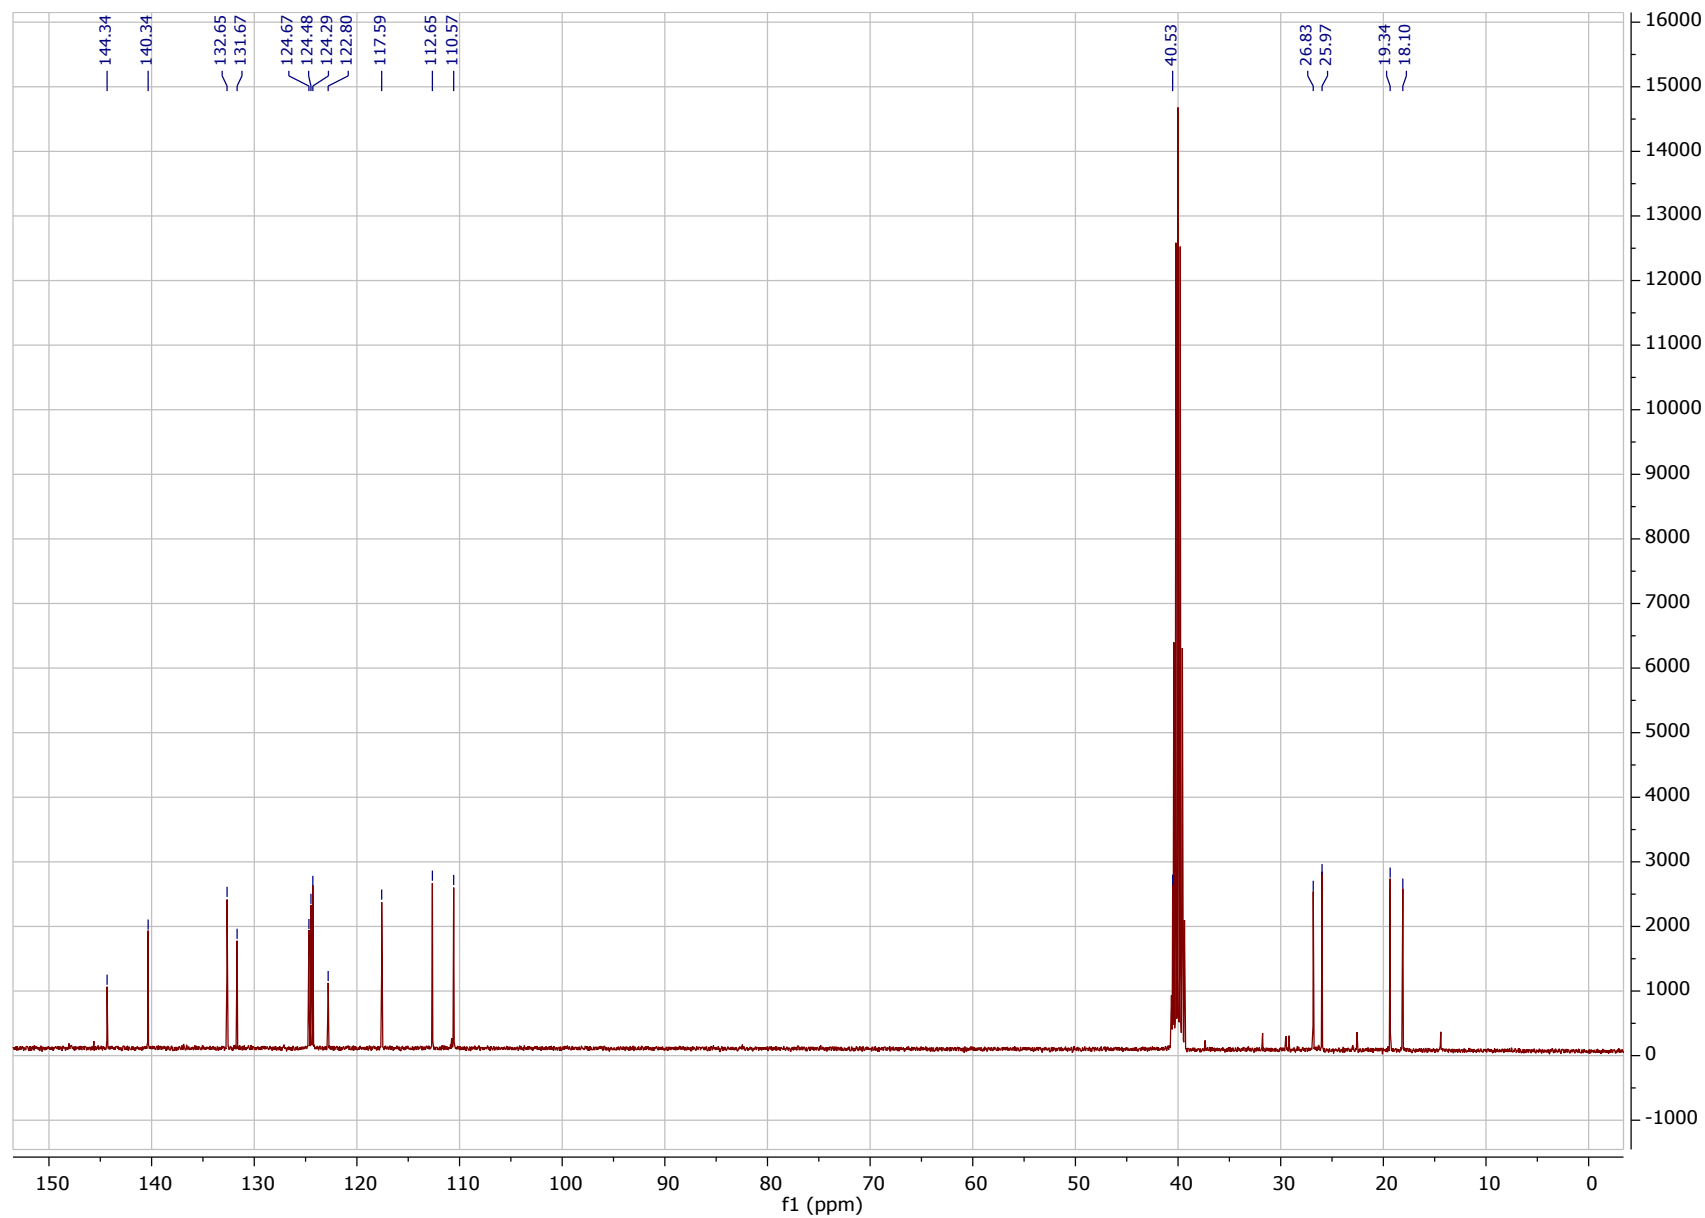

**<sup>1</sup>H NMR of 1-benzylpyridin-2(1H)-imine (7):**

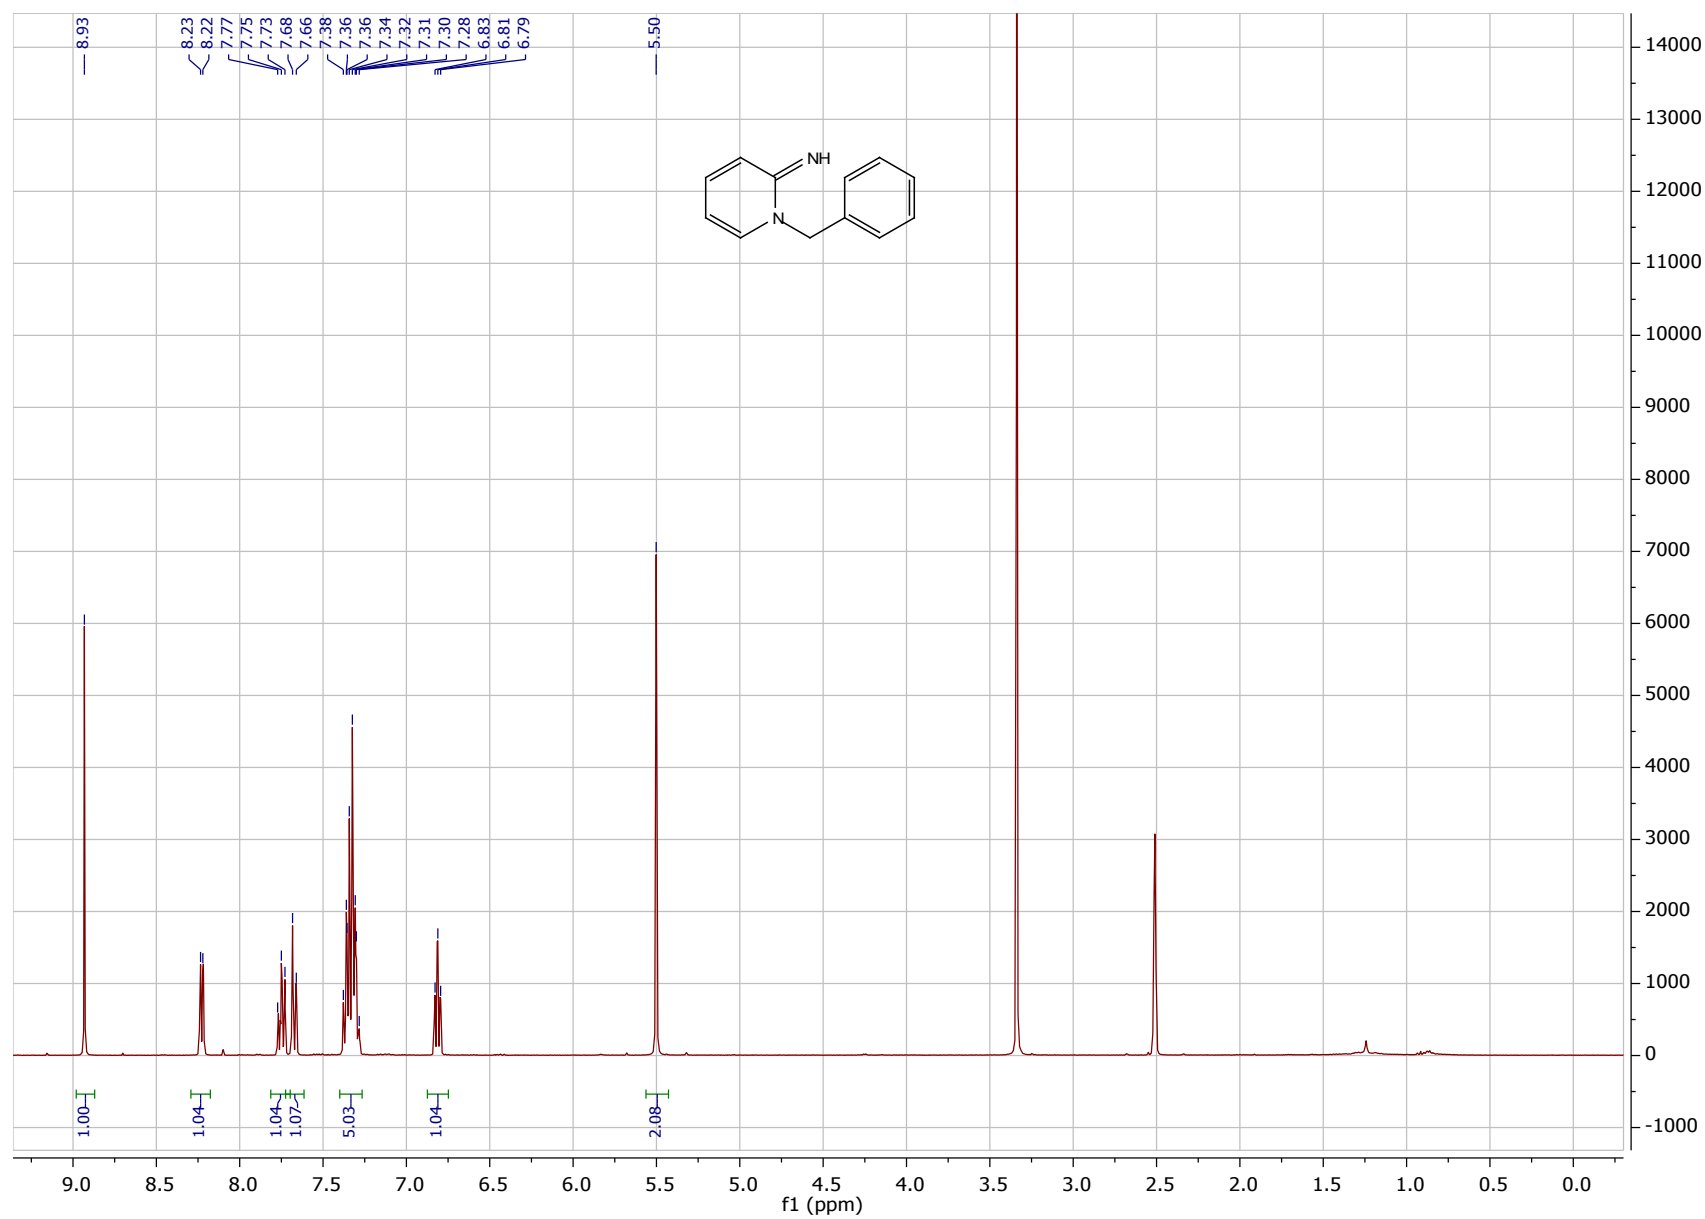

**<sup>13</sup>C NMR of 1-benzylpyridin-2(1*H*)-imine (7):**

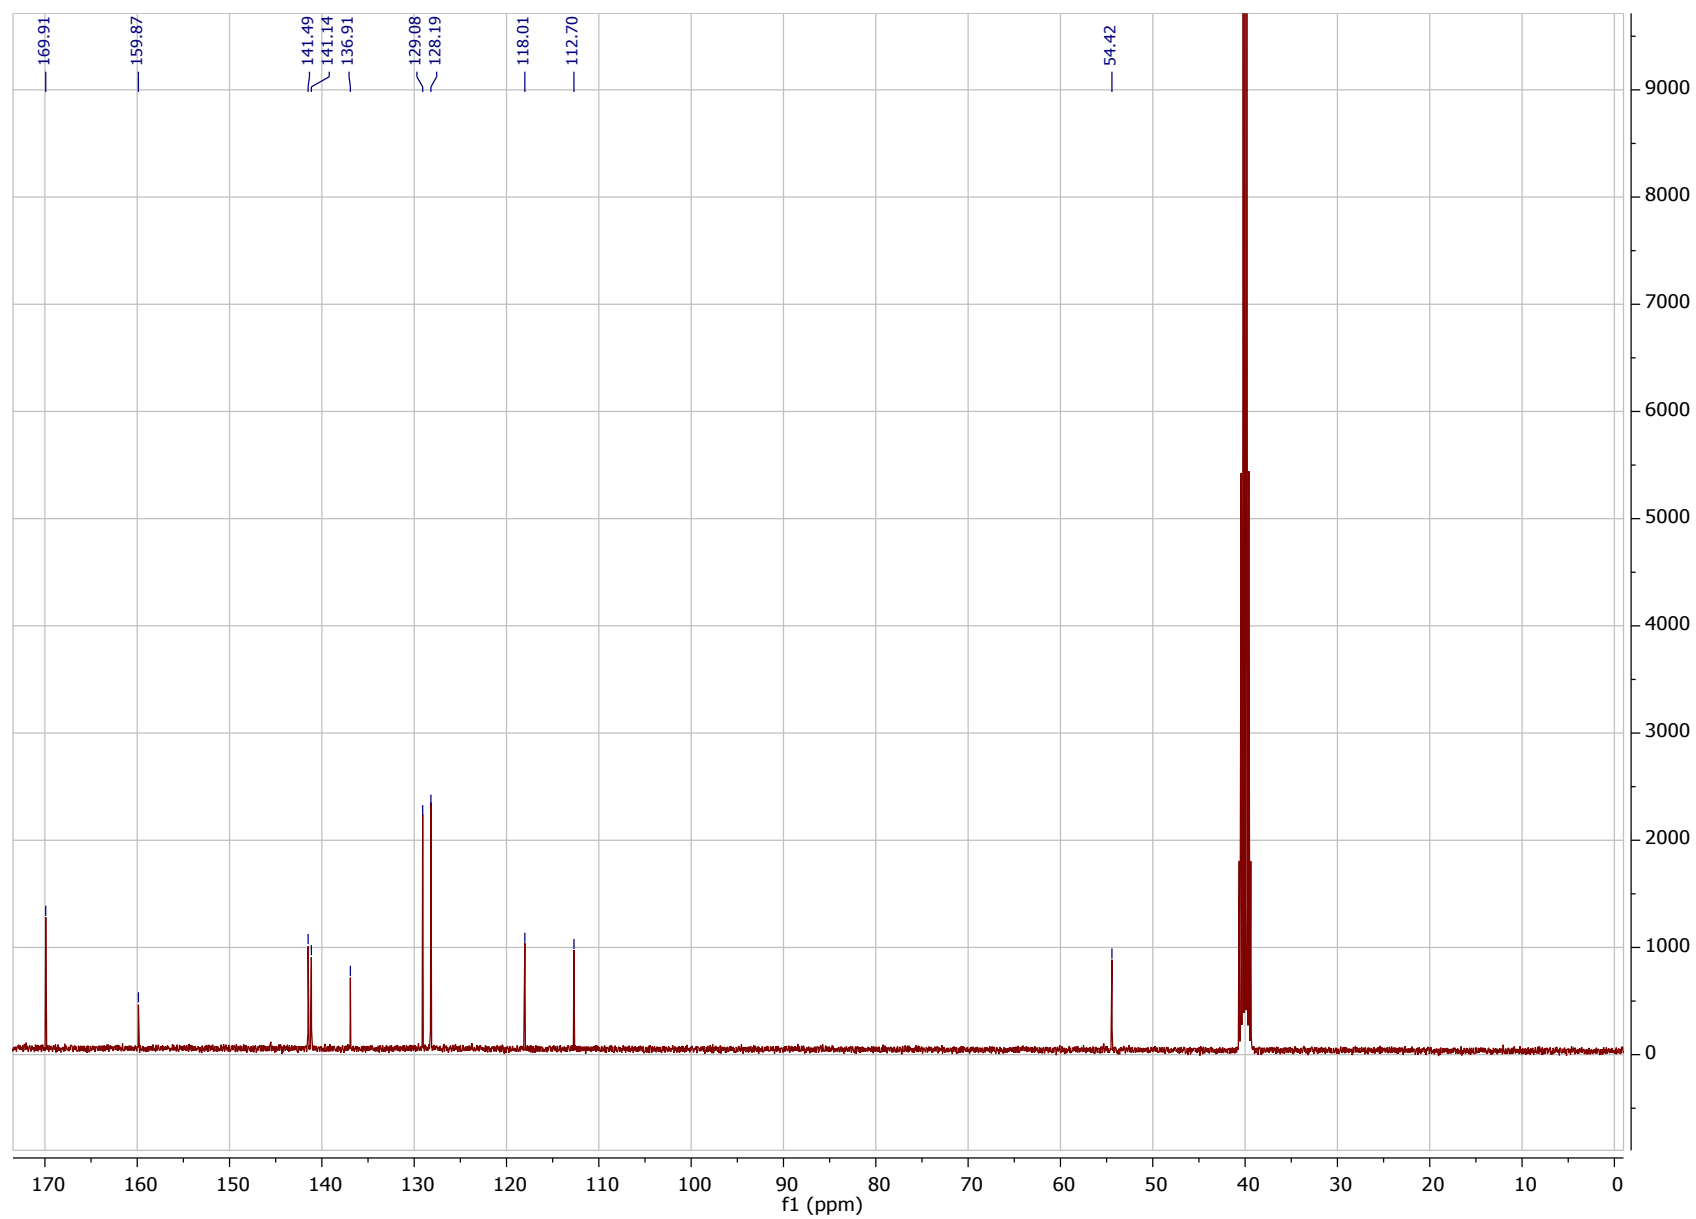

**X-ray crystallography data for 1-benzyl-2-(((dimethylamino)methylene)amino)pyridin-1-ium bromide (2a):**

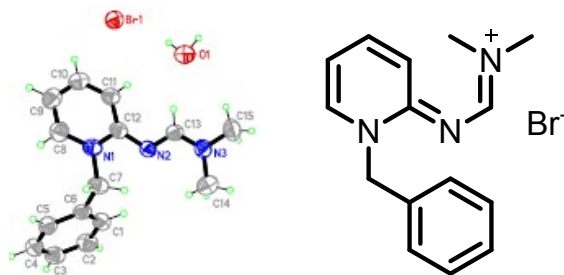

**Table.** Crystal data and structure refinement for Compound **2a**.

|                                 |                                                     |                  |
|---------------------------------|-----------------------------------------------------|------------------|
| CCDC Identification code        | 1922120                                             |                  |
| Empirical formula               | C <sub>15</sub> H <sub>20</sub> Br N <sub>3</sub> O |                  |
| Formula weight                  | 338.25                                              |                  |
| Temperature                     | 299(2) K                                            |                  |
| Wavelength                      | 0.71073 Å                                           |                  |
| Crystal system                  | Monoclinic                                          |                  |
| Space group                     | C2/c                                                |                  |
| Unit cell dimensions            | a = 18.110(3) Å                                     | α = 90°.         |
|                                 | b = 10.9556(18) Å                                   | β = 109.622(5)°. |
|                                 | c = 17.217(3) Å                                     | γ = 90°.         |
| Volume                          | 3217.5(10) Å <sup>3</sup>                           |                  |
| Z                               | 8                                                   |                  |
| Density (calculated)            | 1.397 Mg/m <sup>3</sup>                             |                  |
| Absorption coefficient          | 2.555 mm <sup>-1</sup>                              |                  |
| F(000)                          | 1392                                                |                  |
| Crystal size                    | 0.280 x 0.200 x 0.200 mm <sup>3</sup>               |                  |
| Crystal color / habit           | colorless / block                                   |                  |
| Theta range for data collection | 3.030 to 25.462°.                                   |                  |

|                                   |                                             |
|-----------------------------------|---------------------------------------------|
| Index ranges                      | -21<=h<=21, -13<=k<=13, -20<=l<=20          |
| Reflections collected             | 39434                                       |
| Independent reflections           | 2977 [R(int) = 0.0718]                      |
| Completeness to theta = 25.242°   | 99.7 %                                      |
| Absorption correction             | multi-scan / sadabs                         |
| Refinement method                 | Full-matrix least-squares on F <sup>2</sup> |
| Data / restraints / parameters    | 2977 / 2 / 190                              |
| Goodness-of-fit on F <sup>2</sup> | 1.068                                       |
| Final R indices [I>2sigma(I)]     | R1 = 0.0387, wR2 = 0.0972                   |
| R indices (all data)              | R1 = 0.0573, wR2 = 0.1101                   |
| Extinction coefficient            | n/a                                         |
| Largest diff. peak and hole       | 0.708 and -0.455 e.Å <sup>-3</sup>          |

**X-ray crystallography data for (E)-N-(((1-(2-chloro-6-fluorobenzyl)pyridin-2(1H)-ylidene)amino)methylene)-N-methylmethanaminium chloride (2o):**

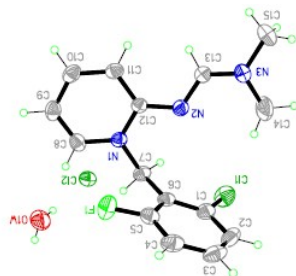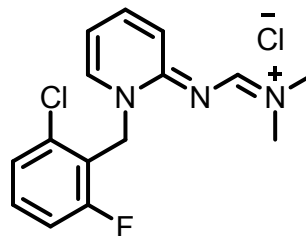

**Table.** Crystal data and structure refinement for compound **2o**.

|                          |                                                       |                  |
|--------------------------|-------------------------------------------------------|------------------|
| CCDC Identification code | 1920096                                               |                  |
| Empirical formula        | C <sub>15</sub> H <sub>18</sub> Cl F N <sub>3</sub> O |                  |
| Formula weight           | 346.22                                                |                  |
| Temperature              | 200(2) K                                              |                  |
| Wavelength               | 0.71073 Å                                             |                  |
| Crystal system           | Triclinic                                             |                  |
| Space group              | P-1                                                   |                  |
| Unit cell dimensions     | a = 8.4862(9) Å                                       | α = 117.555(3)°. |
|                          | b = 10.3569(12) Å                                     | β = 93.859(4)°.  |
|                          | c = 10.6667(12) Å                                     | γ = 95.336(4)°.  |
| Volume                   | 821.07(16) Å <sup>3</sup>                             |                  |
| Z                        | 2                                                     |                  |
| Density (calculated)     | 1.400 Mg/m <sup>3</sup>                               |                  |
| Absorption coefficient   | 0.410 mm <sup>-1</sup>                                |                  |
| F(000)                   | 360                                                   |                  |
| Crystal size             | 0.320 x 0.200 x 0.140 mm <sup>3</sup>                 |                  |
| Crystal color / habit    | pale yellow / block                                   |                  |

|                                   |                                             |
|-----------------------------------|---------------------------------------------|
| Theta range for data collection   | 3.050 to 25.752°.                           |
| Index ranges                      | -10<=h<=10, -12<=k<=12, -13<=l<=13          |
| Reflections collected             | 34369                                       |
| Independent reflections           | 3136 [R(int) = 0.0343]                      |
| Completeness to theta = 25.242°   | 99.8 %                                      |
| Absorption correction             | multi-scan / sadabs                         |
| Refinement method                 | Full-matrix least-squares on F <sup>2</sup> |
| Data / restraints / parameters    | 3136 / 0 / 210                              |
| Goodness-of-fit on F <sup>2</sup> | 1.051                                       |
| Final R indices [I>2sigma(I)]     | R1 = 0.0384, wR2 = 0.1006                   |
| R indices (all data)              | R1 = 0.0446, wR2 = 0.1076                   |
| Extinction coefficient            | 0.050(5)                                    |
| Largest diff. peak and hole       | 0.411 and -0.417 e.Å <sup>-3</sup>          |

X-ray crystallography data for N-(((E)-1-((E)-but-2-en-1-yl)pyridin-2(1H)-ylidene)amino)methylene)-N-methylmethanaminium (8d):

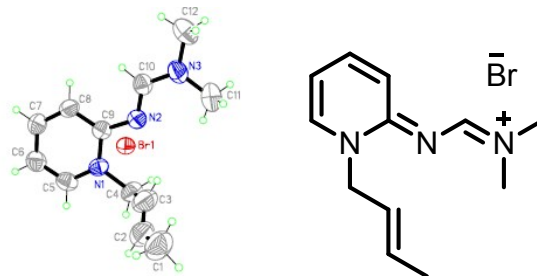

**Table.** Crystal data and structure refinement for compound **9d**.

|                                 |                                                   |                 |
|---------------------------------|---------------------------------------------------|-----------------|
| CCDC Identification code        | 1910925                                           |                 |
| Empirical formula               | C <sub>12</sub> H <sub>18</sub> Br N <sub>3</sub> |                 |
| Formula weight                  | 284.20                                            |                 |
| Temperature                     | 297(2) K                                          |                 |
| Wavelength                      | 0.71073 Å                                         |                 |
| Crystal system                  | Monoclinic                                        |                 |
| Space group                     | P2 <sub>1</sub> /c                                |                 |
| Unit cell dimensions            | a = 10.2000(9) Å                                  | α = 90°.        |
|                                 | b = 18.4716(17) Å                                 | β = 96.769(3)°. |
|                                 | c = 7.3285(7) Å                                   | γ = 90°.        |
| Volume                          | 1371.1(2) Å <sup>3</sup>                          |                 |
| Z                               | 4                                                 |                 |
| Density (calculated)            | 1.377 Mg/m <sup>3</sup>                           |                 |
| Absorption coefficient          | 2.978 mm <sup>-1</sup>                            |                 |
| F(000)                          | 584                                               |                 |
| Crystal size                    | 0.350 x 0.150 x 0.120 mm <sup>3</sup>             |                 |
| Crystal color / habit           | colorless / block                                 |                 |
| Theta range for data collection | 2.985 to 25.404°.                                 |                 |



|                                   |                                             |
|-----------------------------------|---------------------------------------------|
| Index ranges                      | -12<=h<=12, -22<=k<=22, -8<=l<=8            |
| Reflections collected             | 49382                                       |
| Independent reflections           | 2515 [R(int) = 0.0516]                      |
| Completeness to theta = 25.000°   | 99.8 %                                      |
| Absorption correction             | multi-scan / sadabs                         |
| Refinement method                 | Full-matrix least-squares on F <sup>2</sup> |
| Data / restraints / parameters    | 2515 / 0 / 149                              |
| Goodness-of-fit on F <sup>2</sup> | 1.087                                       |
| Final R indices [I>2sigma(I)]     | R1 = 0.0404, wR2 = 0.1063                   |
| R indices (all data)              | R1 = 0.0467, wR2 = 0.1102                   |
| Extinction coefficient            | 0.0147(14)                                  |
| Largest diff. peak and hole       | 0.421 and -0.355 e.Å <sup>-3</sup>          |

**X-ray crystallography data for 3-(2-(trifluoromethyl)phenyl)imidazo[1,2-a]pyridine (3d):**

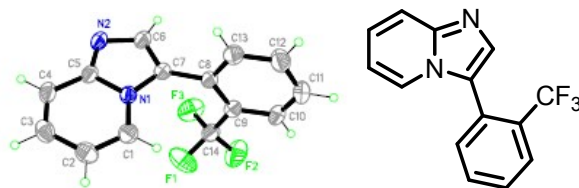

**Table.** Crystal data and structure refinement for **3d**.

|                                 |                                                              |                 |
|---------------------------------|--------------------------------------------------------------|-----------------|
| CCDC Identification code        | 1920095                                                      |                 |
| Empirical formula               | C <sub>14</sub> H <sub>9</sub> F <sub>3</sub> N <sub>2</sub> |                 |
| Formula weight                  | 262.23                                                       |                 |
| Temperature                     | 200(2) K                                                     |                 |
| Wavelength                      | 0.71073 Å                                                    |                 |
| Crystal system                  | Monoclinic                                                   |                 |
| Space group                     | P2 <sub>1</sub> /c                                           |                 |
| Unit cell dimensions            | a = 9.7552(7) Å                                              | α = 90°.        |
|                                 | b = 9.5594(8) Å                                              | β = 91.316(2)°. |
|                                 | c = 12.4421(10) Å                                            | γ = 90°.        |
| Volume                          | 1159.97(16) Å <sup>3</sup>                                   |                 |
| Z                               | 4                                                            |                 |
| Density (calculated)            | 1.502 Mg/m <sup>3</sup>                                      |                 |
| Absorption coefficient          | 0.124 mm <sup>-1</sup>                                       |                 |
| F(000)                          | 536                                                          |                 |
| Crystal size                    | 0.340 x 0.300 x 0.280 mm <sup>3</sup>                        |                 |
| Crystal color / habit           | colorless / block                                            |                 |
| Theta range for data collection | 2.984 to 25.729°.                                            |                 |
| Index ranges                    | -11 ≤ h ≤ 11, -11 ≤ k ≤ 11, -15 ≤ l ≤ 15                     |                 |
| Reflections collected           | 42264                                                        |                 |

|                                   |                                             |
|-----------------------------------|---------------------------------------------|
| Independent reflections           | 2203 [R(int) = 0.0287]                      |
| Completeness to theta = 25.242°   | 99.8 %                                      |
| Absorption correction             | multi-scan / sadabs                         |
| Refinement method                 | Full-matrix least-squares on F <sup>2</sup> |
| Data / restraints / parameters    | 2203 / 0 / 173                              |
| Goodness-of-fit on F <sup>2</sup> | 1.094                                       |
| Final R indices [I>2sigma(I)]     | R1 = 0.0553, wR2 = 0.1425                   |
| R indices (all data)              | R1 = 0.0594, wR2 = 0.1469                   |
| Extinction coefficient            | 0.215(12)                                   |
| Largest diff. peak and hole       | 0.425 and -0.286 e.Å <sup>-3</sup>          |

**X-ray crystallography data for 3-(4-bromophenyl)imidazo[1,2-a]pyridine (3i):**

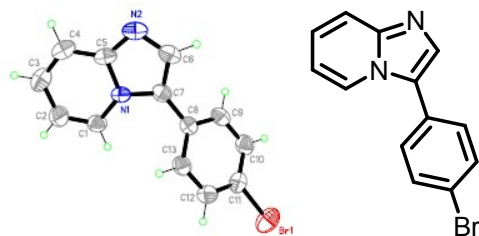

**Table.** Crystal data and structure refinement for **3i**.

|                                 |                                                  |          |
|---------------------------------|--------------------------------------------------|----------|
| CCDC Identification code        | 1920094                                          |          |
| Empirical formula               | C <sub>13</sub> H <sub>9</sub> Br N <sub>2</sub> |          |
| Formula weight                  | 273.13                                           |          |
| Temperature                     | 296(2) K                                         |          |
| Wavelength                      | 0.71073 Å                                        |          |
| Crystal system                  | Orthorhombic                                     |          |
| Space group                     | Pna2 <sub>1</sub>                                |          |
| Unit cell dimensions            | a = 22.620(5) Å                                  | α = 90°. |
|                                 | b = 3.9660(8) Å                                  | β = 90°. |
|                                 | c = 12.201(3) Å                                  | γ = 90°. |
| Volume                          | 1094.6(4) Å <sup>3</sup>                         |          |
| Z                               | 4                                                |          |
| Density (calculated)            | 1.657 Mg/m <sup>3</sup>                          |          |
| Absorption coefficient          | 3.725 mm <sup>-1</sup>                           |          |
| F(000)                          | 544                                              |          |
| Crystal size                    | 0.300 x 0.120 x 0.100 mm <sup>3</sup>            |          |
| Crystal color /habit            | colorless / block                                |          |
| Theta range for data collection | 3.339 to 25.303°.                                |          |

|                                   |                                             |
|-----------------------------------|---------------------------------------------|
| Index ranges                      | -27<=h<=27, -4<=k<=4, -14<=l<=14            |
| Reflections collected             | 16352                                       |
| Independent reflections           | 1992 [R(int) = 0.0362]                      |
| Completeness to theta = 25.242°   | 99.8 %                                      |
| Absorption correction             | multi-scan / sadabs                         |
| Refinement method                 | Full-matrix least-squares on F <sup>2</sup> |
| Data / restraints / parameters    | 1992 / 1 / 147                              |
| Goodness-of-fit on F <sup>2</sup> | 0.957                                       |
| Final R indices [I>2sigma(I)]     | R1 = 0.0266, wR2 = 0.0656                   |
| R indices (all data)              | R1 = 0.0338, wR2 = 0.0693                   |
| Absolute structure parameter      | 0.187(16)                                   |
| Extinction coefficient            | 0.0190(18)                                  |
| Largest diff. peak and hole       | 0.338 and -0.433 e.Å <sup>-3</sup>          |

X-ray crystallography data for (E)-3-(prop-1-en-1-yl)imidazo[1,2-a]pyridine (9d):

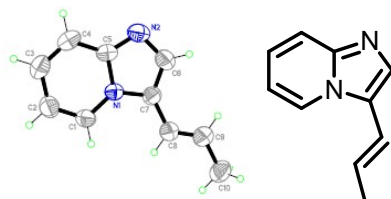

**Table.** Crystal data and structure refinement for **9d**.

|                                 |                                                |                   |
|---------------------------------|------------------------------------------------|-------------------|
| CCDC Identification code        | 1910928                                        |                   |
| Empirical formula               | C <sub>10</sub> H <sub>10</sub> N <sub>2</sub> |                   |
| Formula weight                  | 158.20                                         |                   |
| Temperature                     | 297(2) K                                       |                   |
| Wavelength                      | 0.71073 Å                                      |                   |
| Crystal system                  | Triclinic                                      |                   |
| Space group                     | P-1                                            |                   |
| Unit cell dimensions            | a = 6.4588(12) Å                               | α = 106.039(10)°. |
|                                 | b = 8.1981(17) Å                               | β = 95.947(11)°.  |
|                                 | c = 8.3521(17) Å                               | γ = 92.951(10)°.  |
| Volume                          | 421.25(15) Å <sup>3</sup>                      |                   |
| Z                               | 2                                              |                   |
| Density (calculated)            | 1.247 Mg/m <sup>3</sup>                        |                   |
| Absorption coefficient          | 0.076 mm <sup>-1</sup>                         |                   |
| F(000)                          | 168                                            |                   |
| Crystal size                    | 0.220 x 0.200 x 0.120 mm <sup>3</sup>          |                   |
| Crystal color / habit           | colorless / block                              |                   |
| Theta range for data collection | 3.084 to 25.422°.                              |                   |
| Index ranges                    | -7 ≤ h ≤ 7, -9 ≤ k ≤ 9, -10 ≤ l ≤ 10           |                   |

|                                   |                                             |
|-----------------------------------|---------------------------------------------|
| Reflections collected             | 7413                                        |
| Independent reflections           | 1538 [R(int) = 0.0342]                      |
| Completeness to theta = 25.000°   | 99.8 %                                      |
| Absorption correction             | multi-scan / sadabs                         |
| Refinement method                 | Full-matrix least-squares on F <sup>2</sup> |
| Data / restraints / parameters    | 1538 / 0 / 111                              |
| Goodness-of-fit on F <sup>2</sup> | 1.080                                       |
| Final R indices [I > 2sigma(I)]   | R1 = 0.0428, wR2 = 0.1005                   |
| R indices (all data)              | R1 = 0.0582, wR2 = 0.1109                   |
| Extinction coefficient            | 0.39(3)                                     |
| Largest diff. peak and hole       | 0.148 and -0.173 e.Å <sup>-3</sup>          |
